# Supplementary material
Source: bioRxiv or medRxiv preprint supplement (https://medrxiv.org/highwire/filestream/79142/field_highwire_adjunct_files/1/2020.05.02.20084673-2.pdf)
Supplement: Supplementary file [file 2020.05.02.20084673-2.pdf]

|              | p_val      | avg_logFC  | pct.1 | pct.2 | p_val_adj  | seurat_clusters |
|--------------|------------|------------|-------|-------|------------|-----------------|
| TRBV12-4     | 0          | 0.29031336 | 0.033 | 0.96  | 0          | 0               |
| TRAV21       | 1.96E-245  | 0.32706262 | 0.053 | 0.895 | 3.92E-242  | 0               |
| AC103591.3   | 9.02E-219  | -0.264103  | 0.025 | 0.185 | 1.80E-215  | 0               |
| TRAV13-1     | 9.08E-176  | 0.25136592 | 0.084 | 0.882 | 1.82E-172  | 0               |
| TRBV6-2      | 1.54E-175  | 0.27570529 | 0.053 | 0.832 | 3.08E-172  | 0               |
| TRBV7-2      | 9.46E-160  | 0.4896287  | 0.106 | 0.895 | 1.89E-156  | 0               |
| TRBV6-6      | 6.20E-157  | 0.2817328  | 0.018 | 0.632 | 1.24E-153  | 0               |
| TRAV29DV5    | 1.41E-150  | 0.32643269 | 0.071 | 0.84  | 2.81E-147  | 0               |
| RGS1         | 1.81E-137  | -0.3147683 | 0.04  | 0.248 | 3.63E-134  | 0               |
| TRBV7-9      | 4.18E-129  | 0.35667114 | 0.064 | 0.809 | 8.36E-126  | 0               |
| TRBV6-5      | 1.98E-113  | 0.28055501 | 0.045 | 0.765 | 3.96E-110  | 0               |
| GZMA         | 3.07E-110  | 0.34477315 | 0.214 | 0.981 | 6.15E-107  | 0               |
| CCL5         | 2.37E-84   | 0.36794326 | 0.253 | 0.983 | 4.74E-81   | 0               |
| TRAV38-2DV8  | 2.33E-81   | 0.28202612 | 0.039 | 0.721 | 4.65E-78   | 0               |
| TMEM156      | 1.05E-72   | -0.2698899 | 0.068 | 0.321 | 2.10E-69   | 0               |
| TIPARP       | 1.97E-43   | -0.27125   | 0.091 | 0.372 | 3.94E-40   | 0               |
| STAT1        | 1.55E-26   | 0.28283383 | 0.381 | 0.998 | 3.10E-23   | 0               |
| TOB1         | 1.69E-20   | -0.2785694 | 0.198 | 0.441 | 3.39E-17   | 0               |
| MT2A         | 6.06E-18   | -0.5287484 | 0.327 | 0.817 | 1.21E-14   | 0               |
| ZFP36        | 2.16E-10   | -0.3708284 | 0.624 | 0.847 | 4.33E-07   | 0               |
| TRBV9        | 0.00021125 | 0.26115631 | 0.032 | 0.523 | 0.42250121 | 0               |
| ZFP36L2      | 0.00251393 | -0.3097594 | 0.943 | 0.998 | 1          | 0               |
| JUND         | 0.0397102  | -0.2934537 | 1.155 | 0.536 | 1          | 0               |
| TRBV12-3     | 0.08185158 | 0.29512204 | 0.036 | 0.534 | 1          | 0               |
| KLRB1        | 0.47393198 | 0.25032655 | 0.432 | 0.784 | 1          | 0               |
| TRBV3-1      | 0.84018185 | 0.41031391 | 0.045 | 0.5   | 1          | 0               |
| IFI44L       | 0.99354446 | -0.441425  | 0.048 | 0.456 | 1          | 0               |
| PPBP         | 1.97E-157  | -0.4909711 | 0.007 | 0.212 | 3.94E-154  | 1               |
| NR4A1        | 1.38E-90   | 0.26000096 | 0.253 | 0.975 | 2.76E-87   | 1               |
| CXCL2        | 3.93E-74   | -0.2981918 | 0.012 | 0.306 | 7.85E-71   | 1               |
| CCL3         | 1.54E-57   | -0.3761072 | 0.055 | 0.335 | 3.07E-54   | 1               |
| Z93241.1     | 1.95E-53   | 0.35881577 | 0.325 | 1     | 3.90E-50   | 1               |
| ADM          | 1.46E-47   | -0.2565575 | 0.064 | 0.356 | 2.93E-44   | 1               |
| EREG         | 3.99E-43   | -0.3661655 | 0.034 | 0.359 | 7.98E-40   | 1               |
| TNFSF10      | 1.02E-37   | 0.29790442 | 0.372 | 0.996 | 2.04E-34   | 1               |
| XIST         | 1.68E-30   | 0.31398914 | 0.362 | 1     | 3.36E-27   | 1               |
| G0S2         | 1.40E-24   | -0.3861251 | 0.138 | 0.422 | 2.80E-21   | 1               |
| EGR1         | 3.14E-20   | -0.5016878 | 0.033 | 0.408 | 6.28E-17   | 1               |
| AL138963.3   | 1.97E-19   | 0.34137614 | 0.456 | 0.999 | 3.94E-16   | 1               |
| AC015912.3   | 4.80E-14   | -0.2770392 | 0.074 | 0.44  | 9.60E-11   | 1               |
| RHOB         | 1.68E-09   | 0.27785027 | 0.469 | 1     | 3.35E-06   | 1               |
| TAGLN2       | 2.13E-07   | 0.31661395 | 0.7   | 0.825 | 0.00042595 | 1               |
| MNDA         | 5.99E-07   | -0.2611344 | 0.855 | 1     | 0.00119744 | 1               |
| CXCL8        | 5.81E-05   | -0.4491947 | 0.034 | 0.469 | 0.11612555 | 1               |
| ISG15        | 8.31E-05   | 0.26029183 | 0.232 | 0.693 | 0.1662012  | 1               |
| NFKB1A       | 0.01050548 | 0.25979393 | 0.713 | 0.91  | 1          | 1               |
| CLU          | 0.03449467 | -0.3854841 | 0.003 | 0.524 | 1          | 1               |
| TNFAIP3      | 0.05847586 | -0.2902858 | 0.11  | 0.571 | 1          | 1               |
| TRBV10-3     | 0          | 0.28728376 | 0.026 | 0.968 | 0          | 2               |
| TRAV13-11    | 2.54E-241  | 0.26397025 | 0.084 | 0.968 | 5.08E-238  | 2               |
| TRAV8-4      | 4.00E-196  | 0.27328605 | 0.045 | 0.869 | 8.00E-193  | 2               |
| TRBV18       | 6.69E-190  | 0.33113473 | 0.05  | 0.871 | 1.34E-186  | 2               |
| S100A8       | 1.81E-189  | -0.3497669 | 0.019 | 0.183 | 3.62E-186  | 2               |
| TUBB2A       | 8.97E-186  | -0.3104999 | 0.014 | 0.187 | 1.79E-182  | 2               |
| TRBV12-41    | 1.14E-183  | 0.31117113 | 0.034 | 0.847 | 2.28E-180  | 2               |
| TRBV19       | 1.80E-167  | 0.26350918 | 0.061 | 0.865 | 3.59E-164  | 2               |
| AC103591.31  | 1.82E-142  | -0.5724626 | 0.029 | 0.219 | 3.65E-139  | 2               |
| TRAV38-2DV81 | 4.99E-138  | 0.31357826 | 0.046 | 0.791 | 9.98E-135  | 2               |
| SGK1         | 9.98E-111  | -0.3003763 | 0.025 | 0.26  | 2.00E-107  | 2               |
| PMAIP1       | 2.95E-103  | -0.3713651 | 0.032 | 0.268 | 5.89E-100  | 2               |
| AC245014.3   | 1.41E-86   | -0.3889304 | 0.21  | 0.922 | 2.83E-83   | 2               |
| TRBV7-21     | 3.61E-79   | 0.46147871 | 0.067 | 0.767 | 7.23E-76   | 2               |
| TRBV6-21     | 8.54E-78   | 0.41610643 | 0.052 | 0.746 | 1.71E-74   | 2               |
| TRBV28       | 3.42E-66   | 0.31999986 | 0.047 | 0.32  | 6.84E-63   | 2               |
| STAT11       | 1.59E-54   | 0.25071481 | 0.309 | 1     | 3.17E-51   | 2               |
| TMEM1561     | 3.03E-51   | -0.3468735 | 0.039 | 0.342 | 6.07E-48   | 2               |
| NFKB1A1      | 8.94E-46   | -0.613368  | 0.287 | 0.829 | 1.79E-42   | 2               |
| MT2A1        | 1.94E-32   | -0.3219096 | 0.266 | 0.853 | 3.88E-29   | 2               |
| TRBV6-51     | 6.25E-31   | 0.35127603 | 0.061 | 0.672 | 1.25E-27   | 2               |
| HIFX         | 6.77E-27   | -0.4309062 | 0.295 | 0.815 | 1.35E-23   | 2               |
| AREG         | 3.55E-26   | -0.3146727 | 0.055 | 0.396 | 7.10E-23   | 2               |
| IFIT2        | 2.10E-23   | -0.4191384 | 0.017 | 0.308 | 4.20E-20   | 2               |
| TOB11        | 2.15E-20   | -0.2989358 | 0.148 | 0.431 | 4.30E-17   | 2               |
| TRBV12-31    | 5.32E-18   | 0.6534611  | 0.037 | 0.416 | 1.06E-14   | 2               |
| TRBV3-11     | 7.01E-17   | 0.29861357 | 0.037 | 0.41  | 1.40E-13   | 2               |
| TRBV4-1      | 5.27E-15   | 0.38510898 | 0.025 | 0.26  | 1.05E-11   | 2               |
| HIST1H1C     | 3.55E-14   | -0.3063083 | 0.28  | 0.759 | 7.11E-11   | 2               |
| TRBV5-4      | 3.64E-14   | 0.3599121  | 0.039 | 0.606 | 7.29E-11   | 2               |
| TRBV7-91     | 6.86E-08   | 0.44142686 | 0.059 | 0.596 | 0.00013729 | 2               |
| FOS          | 1.05E-07   | -0.4163767 | 0.643 | 0.835 | 0.00021073 | 2               |
| JUND1        | 1.25E-07   | -0.383823  | 0.093 | 0.469 | 0.00024948 | 2               |
| AL138963.31  | 5.73E-06   | 0.27590653 | 0.537 | 0.994 | 0.01146664 | 2               |
| SUB1         | 1.30E-05   | -0.2576887 | 0.62  | 0.845 | 0.0260843  | 2               |
| IFIT3        | 2.02E-05   | -0.3401857 | 0.008 | 0.314 | 0.04048188 | 2               |
| ZFP36L21     | 0.00032043 | -0.3513931 | 0.937 | 0.996 | 0.64085632 | 2               |
| TRBV20-1     | 0.05741925 | 0.67020901 | 0.104 | 0.531 | 1          | 2               |
| NFKB1Z       | 0.06341139 | -0.3522192 | 0.232 | 0.622 | 1          | 2               |
| IFI44L1      | 0.10069594 | -0.572019  | 0.022 | 0.419 | 1          | 2               |
| HSPA5        | 0.14573272 | -0.3249264 | 0.336 | 0.674 | 1          | 2               |
| DUSP2        | 0.45267549 | -0.3380753 | 0.139 | 0.547 | 1          | 2               |
| DDIT4        | 0.74915786 | -0.4275986 | 0.188 | 0.567 | 1          | 2               |
| TNFAIP31     | 0.80436    | -0.6045136 | 0.22  | 0.577 | 1          | 2               |
| TRBV5-1      | 0.81953052 | 0.284054   | 0.066 | 0.531 | 1          | 2               |
| HIST1H1D     | 0.89733393 | -0.2577563 | 0.463 | 0.688 | 1          | 2               |
| MYOM2        | 5.92E-241  | -0.3025535 | 0.03  | 0.941 | 1.18E-237  | 3               |
| FCER1G       | 4.49E-218  | -0.3267686 | 0.032 | 0.954 | 8.99E-215  | 3               |
| CX3CR1       | 1.90E-193  | -0.280513  | 0.035 | 0.839 | 3.80E-190  | 3               |

|              |            |            |       |       |            |   |
|--------------|------------|------------|-------|-------|------------|---|
| FCGR3A       | 5.65E-191  | -0.4317271 | 0.046 | 0.934 | 1.13E-187  | 3 |
| TRAV38-2DV82 | 3.60E-156  | 0.32054392 | 0.08  | 0.961 | 7.20E-153  | 3 |
| TRBV4-11     | 2.68E-150  | -0.3580819 | 0.03  | 0.868 | 5.36E-147  | 3 |
| FGR          | 2.36E-147  | -0.3014165 | 0.074 | 0.931 | 4.73E-144  | 3 |
| TRDV2        | 1.64E-137  | 0.39282693 | 0.122 | 0.99  | 3.28E-134  | 3 |
| TRAV14DV4    | 1.80E-130  | 0.27942329 | 0.052 | 0.826 | 3.59E-127  | 3 |
| XCL1         | 9.09E-124  | -0.4480226 | 0.113 | 0.947 | 1.82E-120  | 3 |
| XCL2         | 2.19E-123  | -0.3911953 | 0.144 | 0.993 | 4.37E-120  | 3 |
| TRBV6-4      | 9.56E-99   | 0.31404761 | 0.057 | 0.664 | 1.91E-95   | 3 |
| TRBV4-2      | 1.25E-82   | 0.75499541 | 0.085 | 0.822 | 2.50E-79   | 3 |
| HLA-DRB5     | 2.08E-79   | -0.3000115 | 0.16  | 0.921 | 4.15E-76   | 3 |
| TRBV12-42    | 6.10E-75   | 0.2949894  | 0.029 | 0.737 | 1.22E-71   | 3 |
| TRGV4        | 4.70E-74   | 0.26748285 | 0.151 | 0.911 | 9.41E-71   | 3 |
| S100B        | 1.41E-72   | -0.401355  | 0.003 | 0.115 | 2.82E-69   | 3 |
| CLIC3        | 3.57E-70   | -0.5235181 | 0.147 | 0.888 | 7.13E-67   | 3 |
| IFI27        | 3.17E-69   | -0.2775996 | 0.007 | 0.112 | 6.34E-66   | 3 |
| TRBV191      | 3.98E-69   | 0.36061314 | 0.052 | 0.783 | 7.96E-66   | 3 |
| SLC4A10      | 1.02E-65   | 0.34293949 | 0.181 | 0.868 | 2.03E-62   | 3 |
| AC103591.32  | 6.72E-60   | -0.3227405 | 0.033 | 0.283 | 1.34E-56   | 3 |
| JAML         | 9.04E-55   | 0.29447958 | 0.228 | 0.974 | 1.81E-51   | 3 |
| ATF3         | 3.33E-50   | -0.3016888 | 0.014 | 0.286 | 6.66E-47   | 3 |
| HLA-DRA      | 8.00E-48   | -0.5557641 | 0.083 | 0.763 | 1.60E-44   | 3 |
| TRBV6-22     | 8.55E-45   | 0.42995146 | 0.063 | 0.717 | 1.71E-41   | 3 |
| GNLY         | 7.42E-43   | -0.9674425 | 0.141 | 0.799 | 1.48E-39   | 3 |
| LTB          | 1.59E-41   | 0.85527265 | 0.884 | 1     | 3.18E-38   | 3 |
| RGS11        | 1.76E-38   | -0.3142654 | 0.05  | 0.329 | 3.53E-35   | 3 |
| MYC          | 3.41E-35   | 0.41244414 | 0.252 | 0.934 | 6.82E-32   | 3 |
| IFIT21       | 4.00E-33   | -0.6532605 | 0.022 | 0.339 | 8.00E-30   | 3 |
| NKG7         | 1.26E-32   | -0.7454595 | 0.819 | 0.99  | 2.53E-29   | 3 |
| PLEK         | 3.16E-32   | -0.2747856 | 0.344 | 0.99  | 6.32E-29   | 3 |
| OASL         | 1.25E-30   | -0.3218585 | 0.046 | 0.349 | 2.50E-27   | 3 |
| PDE4D        | 2.18E-30   | -0.3038434 | 0.124 | 0.355 | 4.37E-27   | 3 |
| ADGRG1       | 9.23E-27   | -0.3836546 | 0.044 | 0.664 | 1.85E-23   | 3 |
| IL7R         | 1.65E-26   | 0.40002025 | 0.931 | 1     | 3.30E-23   | 3 |
| SAMD3        | 4.22E-25   | -0.3477493 | 0.41  | 0.98  | 8.44E-22   | 3 |
| KLRD1        | 8.58E-25   | -0.535138  | 0.242 | 0.809 | 1.72E-21   | 3 |
| LEF1         | 2.10E-24   | 0.28370027 | 0.217 | 0.839 | 4.19E-21   | 3 |
| PRF1         | 2.28E-23   | -0.3876895 | 0.411 | 1     | 4.57E-20   | 3 |
| APOBEC3G     | 8.00E-23   | -0.3595406 | 0.396 | 0.984 | 1.60E-19   | 3 |
| FCRL6        | 2.69E-22   | -0.3837721 | 0.109 | 0.707 | 5.38E-19   | 3 |
| IFI44L2      | 3.20E-22   | -0.2720636 | 0.039 | 0.352 | 6.39E-19   | 3 |
| CCL4L2       | 2.99E-21   | -0.2991003 | 0.04  | 0.638 | 5.97E-18   | 3 |
| HOPX         | 1.66E-20   | -0.3793567 | 0.414 | 0.984 | 3.31E-17   | 3 |
| TGFBR3       | 1.75E-20   | -0.261387  | 0.159 | 0.747 | 3.51E-17   | 3 |
| GZMH         | 4.14E-20   | -0.7471736 | 0.079 | 0.632 | 8.28E-17   | 3 |
| IDH2         | 9.67E-20   | -0.3561853 | 0.331 | 0.875 | 1.93E-16   | 3 |
| NELL2        | 4.68E-18   | 0.29185093 | 0.362 | 0.98  | 9.35E-15   | 3 |
| RPLP0        | 1.36E-17   | 0.25335308 | 0.998 | 1     | 2.72E-14   | 3 |
| FGFBP2       | 1.23E-16   | -0.9238772 | 0.047 | 0.618 | 2.46E-13   | 3 |
| TRAV1-2      | 1.29E-16   | 0.64973173 | 0.238 | 0.829 | 2.58E-13   | 3 |
| CD63         | 1.52E-16   | -0.2735375 | 0.311 | 0.849 | 3.03E-13   | 3 |
| MIR4435-2HG  | 4.08E-16   | -0.3295777 | 0.056 | 0.401 | 8.15E-13   | 3 |
| RHOB1        | 6.18E-16   | -0.296211  | 0.063 | 0.401 | 1.24E-12   | 3 |
| CST7         | 1.89E-15   | -0.3973235 | 0.747 | 0.984 | 3.78E-12   | 3 |
| HIFX1        | 2.89E-15   | -0.3149223 | 0.285 | 0.438 | 5.77E-12   | 3 |
| ZBP1         | 4.02E-15   | -0.3380175 | 0.107 | 0.411 | 8.04E-12   | 3 |
| ACTB         | 4.02E-14   | -0.2810988 | 1     | 1     | 8.04E-11   | 3 |
| CTSC         | 4.33E-14   | -0.2610317 | 0.469 | 0.974 | 8.67E-11   | 3 |
| TRAV211      | 6.85E-14   | 0.26486989 | 0.041 | 0.546 | 1.37E-10   | 3 |
| EFHD2        | 1.56E-13   | -0.4818134 | 0.136 | 0.684 | 3.11E-10   | 3 |
| LGALS1       | 1.57E-13   | -0.5926699 | 0.236 | 0.743 | 3.14E-10   | 3 |
| TNF          | 4.71E-13   | -0.3494393 | 0.128 | 0.688 | 9.42E-10   | 3 |
| MATK         | 6.34E-12   | -0.2903194 | 0.41  | 0.918 | 1.27E-08   | 3 |
| AQP3         | 1.91E-11   | 0.48013982 | 0.396 | 1     | 3.81E-08   | 3 |
| GPI          | 3.10E-11   | -0.2637345 | 0.453 | 0.947 | 6.21E-08   | 3 |
| TLN1         | 4.60E-11   | -0.2706894 | 0.29  | 0.789 | 9.20E-08   | 3 |
| SH3BGRL3     | 1.47E-10   | -0.2649664 | 0.986 | 1     | 2.94E-07   | 3 |
| TRBV20-11    | 1.47E-09   | 0.36371776 | 0.088 | 0.641 | 2.95E-06   | 3 |
| GZMM         | 3.30E-09   | -0.3810164 | 0.724 | 0.984 | 6.60E-06   | 3 |
| STAT12       | 1.02E-08   | 0.35897279 | 0.355 | 0.885 | 2.04E-05   | 3 |
| CD8A         | 1.38E-08   | -0.4318706 | 0.613 | 0.961 | 2.77E-05   | 3 |
| CD74         | 1.79E-08   | -0.4529615 | 0.923 | 0.997 | 3.58E-05   | 3 |
| ZEB2         | 2.92E-08   | -0.4216912 | 0.085 | 0.438 | 5.84E-05   | 3 |
| CCL31        | 4.13E-08   | -0.2952653 | 0.015 | 0.401 | 8.26E-05   | 3 |
| CCL4         | 4.59E-08   | -1.0707613 | 0.153 | 0.635 | 9.18E-05   | 3 |
| GZMA1        | 1.35E-07   | -0.3788524 | 0.737 | 0.997 | 0.00026989 | 3 |
| PIPA         | 1.70E-07   | -0.3244201 | 0.947 | 0.997 | 0.00034001 | 3 |
| HLA-DPA1     | 3.78E-07   | -0.3668908 | 0.358 | 0.74  | 0.00075563 | 3 |
| GSTP1        | 3.87E-07   | -0.3614882 | 0.554 | 0.901 | 0.00077347 | 3 |
| LGALS9       | 5.64E-07   | -0.3175501 | 0.023 | 0.441 | 0.0011276  | 3 |
| IFITM2       | 1.40E-06   | -0.3780796 | 0.856 | 0.977 | 0.00280912 | 3 |
| HLA-DPB1     | 2.16E-06   | -0.3386509 | 0.387 | 0.75  | 0.00432501 | 3 |
| C12orf75     | 2.51E-06   | -0.2596681 | 0.429 | 0.842 | 0.00502099 | 3 |
| CD69         | 4.77E-06   | 0.25166423 | 0.716 | 0.799 | 0.00953232 | 3 |
| S100A4       | 5.15E-06   | -0.3394867 | 0.96  | 0.993 | 0.01029842 | 3 |
| IFNG         | 9.49E-06   | -0.4245244 | 0.042 | 0.438 | 0.01898627 | 3 |
| TRAV29DV51   | 5.11E-05   | 0.30785626 | 0.043 | 0.562 | 0.10217336 | 3 |
| MT2A2        | 0.00012557 | -0.2738907 | 0.462 | 0.806 | 0.25113561 | 3 |
| AHNAK        | 0.00012871 | -0.3446396 | 0.693 | 0.993 | 0.25741159 | 3 |
| NOSIP        | 0.00022197 | 0.46991842 | 0.658 | 0.993 | 0.44393236 | 3 |
| HSP90B1      | 0.00033677 | -0.4294699 | 0.765 | 1     | 0.67354808 | 3 |
| ISG15        | 0.00036059 | -0.3439619 | 0.308 | 0.704 | 0.72118496 | 3 |
| ACTG1        | 0.00036595 | -0.4194207 | 0.969 | 1     | 0.73189297 | 3 |
| SELL         | 0.00037139 | 0.27864045 | 0.489 | 1     | 0.74277089 | 3 |
| CALR         | 0.00039052 | -0.3545083 | 0.637 | 0.974 | 0.78104055 | 3 |
| CTSW         | 0.00058018 | -0.4953044 | 0.803 | 0.951 | 1          | 3 |
| IFIT31       | 0.00087444 | -0.4726698 | 0.007 | 0.408 | 1          | 3 |
| CORO1A       | 0.00090292 | -0.2721083 | 0.957 | 0.997 | 1          | 3 |

|             |            |            |       |       |            |   |
|-------------|------------|------------|-------|-------|------------|---|
| ATP5F1B     | 0.00091585 | -0.3231379 | 0.633 | 0.964 | 1          | 3 |
| HSPA51      | 0.001163   | -0.2802588 | 0.615 | 0.862 | 1          | 3 |
| Clorf21     | 0.00379198 | -0.2593858 | 0.054 | 0.464 | 1          | 3 |
| HNRNPA2B1   | 0.00520904 | -0.2610659 | 0.903 | 0.993 | 1          | 3 |
| ENC1        | 0.00559787 | -0.262174  | 0.017 | 0.444 | 1          | 3 |
| PIIB        | 0.00599809 | -0.2795234 | 0.872 | 0.997 | 1          | 3 |
| OAZ1        | 0.01006122 | -0.3319462 | 0.916 | 1     | 1          | 3 |
| IFTM3       | 0.01211228 | -0.2577909 | 0.571 | 1     | 1          | 3 |
| KLRB11      | 0.0131507  | 0.70437775 | 0.498 | 0.993 | 1          | 3 |
| SPON2       | 0.01355312 | -0.4795956 | 0.074 | 0.569 | 1          | 3 |
| GZMB        | 0.03338446 | -0.7561576 | 0.025 | 0.47  | 1          | 3 |
| NCL         | 0.05405629 | -0.3085469 | 0.773 | 0.997 | 1          | 3 |
| SLC9A3R1    | 0.07963549 | -0.3392807 | 0.702 | 1     | 1          | 3 |
| PSMB9       | 0.08382618 | -0.3274356 | 0.817 | 1     | 1          | 3 |
| ANXA6       | 0.09386463 | -0.2936544 | 0.692 | 1     | 1          | 3 |
| TUBA4A      | 0.16973289 | -0.3200913 | 0.361 | 0.671 | 1          | 3 |
| ANXA1       | 0.19244363 | -0.2649686 | 0.76  | 0.997 | 1          | 3 |
| CD7         | 0.21123784 | -0.2971149 | 0.747 | 0.98  | 1          | 3 |
| NCR3        | 0.22072282 | 0.26909971 | 0.375 | 0.786 | 1          | 3 |
| NFKB1Z1     | 0.28108961 | -0.2887392 | 0.231 | 0.622 | 1          | 3 |
| MAP3K8      | 0.30127783 | -0.3632068 | 0.161 | 0.546 | 1          | 3 |
| NEAT1       | 0.31009991 | -0.2971478 | 0.437 | 0.641 | 1          | 3 |
| LCK         | 0.39472468 | -0.284784  | 0.839 | 1     | 1          | 3 |
| HLA-DRB1    | 0.46547982 | -0.5881483 | 0.194 | 0.576 | 1          | 3 |
| HERPUD1     | 0.49486695 | -0.3165683 | 0.287 | 0.592 | 1          | 3 |
| TCF7        | 0.77788546 | 0.37350117 | 0.542 | 0.951 | 1          | 3 |
| ATF31       | 3.07E-181  | -0.3153619 | 0.014 | 0.11  | 6.13E-178  | 4 |
| TRDV21      | 1.25E-176  | -0.3540664 | 0.009 | 0.751 | 2.50E-173  | 4 |
| LILRB1      | 7.25E-157  | -0.3052423 | 0.024 | 0.137 | 1.45E-153  | 4 |
| MTIE        | 1.14E-150  | -0.2775422 | 0.003 | 0.127 | 2.28E-147  | 4 |
| LMNA        | 2.29E-149  | -0.4226045 | 0.009 | 0.134 | 4.57E-146  | 4 |
| AC103591.33 | 4.68E-130  | -0.4045806 | 0.021 | 0.173 | 9.36E-127  | 4 |
| CD8B        | 2.29E-129  | -0.2536722 | 0.023 | 0.801 | 4.59E-126  | 4 |
| LINC02446   | 5.84E-116  | -0.4386802 | 0.002 | 0.141 | 1.17E-112  | 4 |
| GRASP       | 4.63E-115  | -0.4121023 | 0.011 | 0.173 | 9.26E-112  | 4 |
| TRGV9       | 4.84E-112  | -0.3418929 | 0.16  | 0.976 | 9.69E-109  | 4 |
| ENC11       | 3.51E-109  | -0.4650656 | 0.024 | 0.199 | 7.01E-106  | 4 |
| IFI44L3     | 1.65E-103  | -0.4254261 | 0.006 | 0.211 | 3.30E-100  | 4 |
| S100B1      | 3.83E-102  | -0.3980102 | 0.002 | 0.213 | 7.66E-99   | 4 |
| RPS4Y1      | 1.35E-101  | -0.3334195 | 0     | 0.127 | 2.70E-98   | 4 |
| GZMK        | 5.49E-99   | 0.37541354 | 0.109 | 0.894 | 1.10E-95   | 4 |
| PTMS        | 7.35E-89   | -0.4717448 | 0.01  | 0.225 | 1.47E-85   | 4 |
| RGCC        | 6.14E-87   | -0.39628   | 0.031 | 0.791 | 1.23E-83   | 4 |
| MIDN        | 3.66E-82   | -0.2676439 | 0.17  | 0.923 | 7.31E-79   | 4 |
| ERLEC1      | 6.24E-82   | -0.250758  | 0.143 | 0.897 | 1.25E-78   | 4 |
| OASL1       | 1.62E-79   | -0.5580378 | 0.032 | 0.237 | 3.25E-76   | 4 |
| EPST11      | 4.77E-75   | -0.3318136 | 0.073 | 0.252 | 9.54E-72   | 4 |
| LAG3        | 2.55E-73   | -0.3878807 | 0.004 | 0.254 | 5.11E-70   | 4 |
| S100A81     | 3.56E-70   | -0.2604001 | 0.014 | 0.235 | 7.11E-67   | 4 |
| TRDV1       | 1.05E-66   | -0.3228939 | 0.004 | 0.182 | 2.11E-63   | 4 |
| CCL3L1      | 5.83E-61   | -0.4401882 | 0.011 | 0.23  | 1.17E-57   | 4 |
| AREG1       | 8.30E-61   | -0.4088987 | 0.04  | 0.281 | 1.66E-57   | 4 |
| PDE4D1      | 1.76E-53   | -0.3610049 | 0.102 | 0.295 | 3.51E-50   | 4 |
| IFT22       | 8.48E-51   | -0.9602263 | 0.043 | 0.297 | 1.70E-47   | 4 |
| TRGV5       | 1.80E-50   | -0.2912334 | 0.001 | 0.209 | 3.60E-47   | 4 |
| NFKB1Z2     | 1.08E-46   | -0.571436  | 0.081 | 0.309 | 2.16E-43   | 4 |
| IFT32       | 3.13E-46   | -1.0627938 | 0.028 | 0.305 | 6.25E-43   | 4 |
| TIPARP1     | 1.90E-45   | -0.3856152 | 0.082 | 0.314 | 3.80E-42   | 4 |
| PTGDS       | 4.56E-45   | -0.5580634 | 0.055 | 0.317 | 9.11E-42   | 4 |
| CFAP20      | 4.68E-44   | -0.3329213 | 0.082 | 0.319 | 9.36E-41   | 4 |
| KIR2DL1     | 1.80E-43   | 0.36521565 | 0.219 | 0.902 | 3.60E-40   | 4 |
| MYADM       | 2.08E-43   | -0.3926246 | 0.094 | 0.321 | 4.16E-40   | 4 |
| KLRC1       | 5.18E-42   | 0.35266404 | 0.299 | 1     | 1.04E-38   | 4 |
| HLA-DRB11   | 4.00E-39   | -0.566069  | 0.08  | 0.329 | 8.00E-36   | 4 |
| KLRC3       | 1.38E-38   | -0.3164374 | 0.062 | 0.333 | 2.76E-35   | 4 |
| LGALS91     | 2.20E-38   | -0.3053933 | 0.052 | 0.333 | 4.39E-35   | 4 |
| PTPRE       | 3.87E-32   | -0.2521644 | 0.225 | 0.837 | 7.75E-29   | 4 |
| EOMES       | 4.33E-32   | 0.3056915  | 0.24  | 0.887 | 8.66E-29   | 4 |
| SIGLEC7     | 3.84E-31   | 0.30881583 | 0.321 | 1     | 7.68E-28   | 4 |
| LYST        | 7.91E-31   | -0.2819113 | 0.159 | 0.367 | 1.58E-27   | 4 |
| SDHC        | 2.78E-28   | 0.30002308 | 0.313 | 0.966 | 5.56E-25   | 4 |
| TIMP1       | 2.75E-27   | 0.31011504 | 0.341 | 0.988 | 5.51E-24   | 4 |
| PRDM1       | 3.07E-27   | -0.3713312 | 0.122 | 0.369 | 6.14E-24   | 4 |
| HERC5       | 5.33E-26   | -0.572153  | 0.06  | 0.367 | 1.07E-22   | 4 |
| PSMB2       | 3.04E-25   | 0.26162745 | 0.296 | 0.916 | 6.09E-22   | 4 |
| HBB         | 1.36E-24   | -0.8620771 | 0.003 | 0.221 | 2.73E-21   | 4 |
| CD3G        | 3.10E-24   | -0.5041889 | 0.032 | 0.367 | 6.20E-21   | 4 |
| FOSB        | 1.12E-23   | -0.3331591 | 0.171 | 0.763 | 2.24E-20   | 4 |
| XIST1       | 1.53E-23   | -0.4185636 | 0.151 | 0.386 | 3.06E-20   | 4 |
| ZBP11       | 2.17E-23   | -0.4400969 | 0.202 | 0.388 | 4.34E-20   | 4 |
| CXXC5       | 2.60E-20   | 0.32614342 | 0.363 | 1     | 5.20E-17   | 4 |
| PMAIP11     | 7.95E-20   | -0.4962057 | 0.166 | 0.398 | 1.59E-16   | 4 |
| GSN         | 8.50E-20   | 0.29926034 | 0.369 | 1     | 1.70E-16   | 4 |
| GNLY1       | 2.03E-19   | 0.3020329  | 0.984 | 0.988 | 4.06E-16   | 4 |
| TNF1        | 2.69E-19   | -0.4170874 | 0.027 | 0.379 | 5.39E-16   | 4 |
| RGS12       | 1.30E-18   | -0.2765149 | 0.013 | 0.367 | 2.60E-15   | 4 |
| IL32        | 1.94E-17   | 0.58223148 | 0.737 | 0.866 | 3.87E-14   | 4 |
| NR4A2       | 1.48E-14   | -0.3372947 | 0.157 | 0.429 | 2.97E-11   | 4 |
| HLA-DPA11   | 1.09E-13   | -0.2521493 | 0.25  | 0.451 | 2.19E-10   | 4 |
| ITGAX       | 1.13E-13   | -0.3661675 | 0.103 | 0.664 | 2.27E-10   | 4 |
| JUND2       | 3.33E-13   | -0.2559417 | 0.107 | 0.429 | 6.66E-10   | 4 |
| GBP5        | 1.33E-12   | -0.4021845 | 0.495 | 0.986 | 2.65E-09   | 4 |
| XCL11       | 1.44E-11   | 0.55638864 | 0.4   | 1     | 2.87E-08   | 4 |
| ISG152      | 1.42E-08   | -0.3461018 | 0.292 | 0.484 | 2.83E-05   | 4 |
| ABRACL      | 5.17E-08   | 0.28554691 | 0.428 | 1     | 0.00010339 | 4 |
| LAT2        | 8.62E-07   | 0.30406862 | 0.437 | 1     | 0.00172439 | 4 |
| ELL2        | 9.83E-07   | -0.3302378 | 0.027 | 0.436 | 0.0019656  | 4 |
| HSP90B11    | 1.32E-06   | -0.3910004 | 0.669 | 0.99  | 0.00263541 | 4 |

|             |            |            |       |       |            |   |
|-------------|------------|------------|-------|-------|------------|---|
| TYMP        | 3.39E-06   | -0.3565146 | 0.069 | 0.46  | 0.00677893 | 4 |
| MX1         | 0.00021081 | -0.3499293 | 0.057 | 0.47  | 0.42162083 | 4 |
| CCL41       | 0.00021695 | -0.4291912 | 0.61  | 0.978 | 0.43389379 | 4 |
| CTSW1       | 0.00025005 | -0.2646159 | 0.977 | 0.998 | 0.50009026 | 4 |
| CCL51       | 0.00061189 | 0.25967734 | 0.811 | 0.954 | 1          | 4 |
| BANF1       | 0.00077123 | 0.258591   | 0.482 | 1     | 1          | 4 |
| ODC1        | 0.00140429 | -0.2592778 | 0.091 | 0.492 | 1          | 4 |
| CCL32       | 0.00151282 | -0.4463075 | 0.213 | 0.659 | 1          | 4 |
| GLIPR1      | 0.00212491 | 0.33610362 | 0.344 | 0.796 | 1          | 4 |
| ZEB21       | 0.00383698 | -0.414775  | 0.41  | 0.724 | 1          | 4 |
| HIFX2       | 0.00498634 | -0.7678643 | 0.119 | 0.494 | 1          | 4 |
| CD3D        | 0.00500156 | -0.9055922 | 0.047 | 0.554 | 1          | 4 |
| HSPA52      | 0.06585184 | -0.2579733 | 0.595 | 0.823 | 1          | 4 |
| FOS1        | 0.0781031  | -0.3779187 | 0.585 | 0.779 | 1          | 4 |
| LTA         | 0.12941279 | -0.3126003 | 0.027 | 0.46  | 1          | 4 |
| HNRNPA2B11  | 0.21716723 | -0.3921038 | 0.871 | 0.995 | 1          | 4 |
| TNFAIP32    | 0.2509555  | -0.6336634 | 0.115 | 0.52  | 1          | 4 |
| NEAT11      | 0.26847652 | -0.3588237 | 0.554 | 0.727 | 1          | 4 |
| HERPUD11    | 0.35297026 | -0.2722921 | 0.231 | 0.58  | 1          | 4 |
| TRGC2       | 0.47004501 | -0.3679961 | 0.064 | 0.54  | 1          | 4 |
| XCL21       | 0.49846291 | 0.44749983 | 0.535 | 1     | 1          | 4 |
| PIB1        | 0.50230728 | -0.2571829 | 0.845 | 1     | 1          | 4 |
| ANXA11      | 0.66031183 | -0.3554406 | 0.726 | 0.998 | 1          | 4 |
| MT2A3       | 0.87459427 | -0.3436888 | 0.353 | 0.633 | 1          | 4 |
| ACTG11      | 0.97898782 | -0.3129555 | 0.988 | 1     | 1          | 4 |
| IGLV2-11    | 1.05E-220  | 1.15509417 | 0.033 | 0.945 | 2.09E-217  | 5 |
| IGHV1-24    | 5.57E-213  | 0.53426766 | 0.022 | 0.856 | 1.11E-209  | 5 |
| IGKV1D-39   | 1.21E-201  | 0.28455164 | 0.046 | 0.966 | 2.42E-198  | 5 |
| IGHV3-11    | 5.67E-178  | 0.42008943 | 0.029 | 0.873 | 1.13E-174  | 5 |
| IGHV4-34    | 1.25E-173  | 0.3651868  | 0.061 | 0.966 | 2.50E-170  | 5 |
| IGHA2       | 2.26E-168  | -0.2798042 | 0.051 | 0.914 | 4.52E-165  | 5 |
| IGHV3-74    | 3.60E-165  | 0.8831649  | 0.039 | 0.784 | 7.20E-162  | 5 |
| IGKV1-9     | 6.22E-159  | 0.6601396  | 0.021 | 0.822 | 1.24E-155  | 5 |
| IGHV1-3     | 1.59E-145  | 0.3321552  | 0.032 | 0.866 | 3.18E-142  | 5 |
| GNLY2       | 2.95E-145  | 0.91745372 | 0.069 | 0.928 | 5.91E-142  | 5 |
| KLF4        | 9.59E-136  | -0.3821325 | 0.016 | 0.161 | 1.92E-132  | 5 |
| IGKV2D-29   | 2.26E-133  | 0.26702771 | 0.051 | 0.897 | 4.52E-130  | 5 |
| GZMA2       | 2.46E-132  | 0.27284338 | 0.06  | 0.76  | 4.92E-129  | 5 |
| IGLV3-1     | 2.23E-129  | 0.6456187  | 0.043 | 0.86  | 4.45E-126  | 5 |
| UTY         | 9.58E-119  | -0.3875269 | 0     | 0.188 | 1.92E-115  | 5 |
| IGHV2-5     | 5.51E-116  | 0.57406295 | 0.025 | 0.788 | 1.10E-112  | 5 |
| IGLV2-8     | 1.59E-114  | 1.00614828 | 0.028 | 0.836 | 3.18E-111  | 5 |
| IGKV4-1     | 9.77E-114  | 0.93568023 | 0.1   | 0.935 | 1.95E-110  | 5 |
| NKG71       | 5.63E-112  | 0.56789674 | 0.07  | 0.726 | 1.13E-108  | 5 |
| CTSW2       | 9.26E-112  | 0.2654683  | 0.075 | 0.74  | 1.85E-108  | 5 |
| IGHV4-39    | 4.93E-104  | 1.17186588 | 0.081 | 0.89  | 9.86E-101  | 5 |
| IGLV1-47    | 1.35E-102  | 1.02081278 | 0.088 | 0.897 | 2.70E-99   | 5 |
| IGLV6-57    | 3.58E-99   | 0.52614439 | 0.026 | 0.671 | 7.16E-96   | 5 |
| IGHV1-46    | 5.84E-92   | 0.58147338 | 0.02  | 0.185 | 1.17E-88   | 5 |
| IGHV5-51    | 1.45E-90   | -0.7341045 | 0.06  | 0.842 | 2.89E-87   | 5 |
| IGLV1-51    | 6.79E-89   | 1.11732593 | 0.051 | 0.825 | 1.36E-85   | 5 |
| IGLV2-23    | 1.23E-87   | 0.70119183 | 0.034 | 0.74  | 2.45E-84   | 5 |
| ELL21       | 3.31E-85   | -0.2616995 | 0.046 | 0.226 | 6.62E-82   | 5 |
| IGLV1-40    | 3.87E-83   | 1.34425884 | 0.057 | 0.825 | 7.74E-80   | 5 |
| IGKV2-30    | 3.20E-82   | 0.68842224 | 0.034 | 0.733 | 6.39E-79   | 5 |
| IGKV3-20    | 1.14E-80   | 1.3988471  | 0.142 | 0.928 | 2.29E-77   | 5 |
| IL321       | 1.52E-74   | 0.84890627 | 0.173 | 0.959 | 3.04E-71   | 5 |
| IGHV3-15    | 1.64E-74   | 0.46012737 | 0.038 | 0.788 | 3.27E-71   | 5 |
| IGHV3-30    | 8.00E-72   | 0.68371935 | 0.084 | 0.836 | 1.60E-68   | 5 |
| GRASP1      | 1.02E-70   | -0.3345332 | 0.037 | 0.253 | 2.04E-67   | 5 |
| TCF71       | 1.08E-66   | 0.25111237 | 0.126 | 0.863 | 2.17E-63   | 5 |
| SOX4        | 2.36E-58   | -0.4148168 | 0.06  | 0.774 | 4.72E-55   | 5 |
| IGLV3-25    | 1.04E-56   | 0.70755288 | 0.021 | 0.685 | 2.07E-53   | 5 |
| IL7R1       | 1.04E-53   | 0.49909875 | 0.138 | 0.853 | 2.09E-50   | 5 |
| CD3D1       | 1.54E-51   | 0.3152809  | 0.121 | 0.695 | 3.07E-48   | 5 |
| IGHV3-23    | 3.37E-50   | 0.72265254 | 0.162 | 0.873 | 6.75E-47   | 5 |
| LINC01781   | 2.17E-43   | 0.25459903 | 0.24  | 0.949 | 4.34E-40   | 5 |
| CCL52       | 3.01E-43   | 0.45040969 | 0.094 | 0.774 | 6.01E-40   | 5 |
| IGHV3-33    | 2.44E-41   | 0.3269527  | 0.03  | 0.705 | 4.88E-38   | 5 |
| IGHV6-1     | 6.91E-41   | 0.29644811 | 0.012 | 0.654 | 1.38E-37   | 5 |
| IGHV1-2     | 1.27E-40   | 0.55755874 | 0.07  | 0.747 | 2.53E-37   | 5 |
| IGHV3-21    | 1.15E-39   | 0.44912899 | 0.08  | 0.753 | 2.30E-36   | 5 |
| CFAP201     | 8.34E-39   | -0.6712226 | 0.057 | 0.318 | 1.67E-35   | 5 |
| IGHV3-53    | 7.04E-38   | 0.34963691 | 0.013 | 0.503 | 1.41E-34   | 5 |
| LMNA1       | 2.64E-37   | -0.3425089 | 0.017 | 0.277 | 5.28E-34   | 5 |
| YBX3        | 1.95E-36   | -0.3973741 | 0.133 | 0.325 | 3.91E-33   | 5 |
| CD71        | 3.07E-36   | 0.43889778 | 0.13  | 0.647 | 6.14E-33   | 5 |
| IGHV1-18    | 4.88E-36   | 0.91008767 | 0.046 | 0.705 | 9.76E-33   | 5 |
| SLC9A3R11   | 2.92E-34   | 0.27818564 | 0.27  | 0.962 | 5.85E-31   | 5 |
| NFKB1Z3     | 6.87E-32   | -0.2543374 | 0.169 | 0.342 | 1.37E-28   | 5 |
| IGLV1-44    | 3.89E-30   | 1.06189881 | 0.077 | 0.719 | 7.79E-27   | 5 |
| AC103591.34 | 5.46E-29   | -0.8437407 | 0.048 | 0.346 | 1.09E-25   | 5 |
| PHACTR1     | 7.93E-29   | -0.376498  | 0.199 | 0.818 | 1.59E-25   | 5 |
| RAB11FIP1   | 4.16E-28   | -0.4153297 | 0.112 | 0.356 | 8.32E-25   | 5 |
| IGHV4-59    | 4.56E-28   | 0.67068852 | 0.089 | 0.726 | 9.12E-25   | 5 |
| NFKBID      | 1.67E-27   | -0.3647384 | 0.118 | 0.36  | 3.34E-24   | 5 |
| ITGB1       | 8.70E-24   | 0.32533354 | 0.225 | 0.846 | 1.74E-20   | 5 |
| IGHV3-7     | 2.24E-22   | 0.78960306 | 0.076 | 0.695 | 4.48E-19   | 5 |
| IFI44L4     | 9.98E-22   | -0.4897447 | 0.036 | 0.346 | 2.00E-18   | 5 |
| IGLV8-61    | 1.10E-21   | 0.36734382 | 0.018 | 0.527 | 2.19E-18   | 5 |
| EFHD21      | 8.56E-21   | -0.3461887 | 0.087 | 0.384 | 1.71E-17   | 5 |
| BACH2       | 7.00E-19   | -0.5753116 | 0.402 | 0.925 | 1.40E-15   | 5 |
| NR4A21      | 8.59E-18   | -0.6041504 | 0.137 | 0.394 | 1.72E-14   | 5 |
| IGLV2-14    | 1.64E-17   | 1.09353956 | 0.085 | 0.682 | 3.29E-14   | 5 |
| WARS        | 9.64E-17   | -0.3526105 | 0.075 | 0.664 | 1.93E-13   | 5 |
| IGLV3-19    | 9.38E-14   | 0.44522377 | 0.022 | 0.616 | 1.88E-10   | 5 |
| IGHD        | 3.33E-13   | -0.2908925 | 0.449 | 0.959 | 6.66E-10   | 5 |
| ADAM28      | 1.53E-11   | -0.3150788 | 0.492 | 0.993 | 3.06E-08   | 5 |

|             |            |            |       |       |            |   |
|-------------|------------|------------|-------|-------|------------|---|
| AC245014.31 | 1.93E-11   | -0.4970586 | 0.248 | 0.452 | 3.87E-08   | 5 |
| FOSB1       | 3.52E-11   | -0.345554  | 0.229 | 0.449 | 7.05E-08   | 5 |
| YWHAQ       | 1.98E-10   | -0.2723436 | 0.45  | 0.973 | 3.96E-07   | 5 |
| CD22        | 2.75E-10   | -0.2691973 | 0.481 | 0.949 | 5.49E-07   | 5 |
| TUBB4B      | 4.23E-10   | -0.4024328 | 0.13  | 0.442 | 8.46E-07   | 5 |
| AC007952.4  | 8.86E-10   | -0.5028262 | 0.416 | 0.877 | 1.77E-06   | 5 |
| MAP3K81     | 1.46E-09   | -0.4088179 | 0.256 | 0.455 | 2.92E-06   | 5 |
| IGKV1-16    | 2.35E-09   | 0.30920775 | 0.006 | 0.401 | 4.70E-06   | 5 |
| IGHV3-72    | 2.03E-08   | 0.35071594 | 0.012 | 0.479 | 4.05E-05   | 5 |
| HLA-DRB12   | 2.13E-08   | -0.2780421 | 0.995 | 1     | 4.25E-05   | 5 |
| FCER2       | 2.22E-08   | -0.3399348 | 0.566 | 0.993 | 4.43E-05   | 5 |
| HLA-DRA1    | 2.91E-08   | -0.2662593 | 0.991 | 1     | 5.82E-05   | 5 |
| HERPUD12    | 7.00E-08   | -0.3703102 | 0.364 | 0.795 | 0.00014002 | 5 |
| BLK         | 1.24E-07   | -0.3725977 | 0.56  | 0.99  | 0.00024865 | 5 |
| HLA-DQB1    | 1.06E-06   | -0.4475559 | 0.947 | 1     | 0.00211159 | 5 |
| HLA-DQA1    | 1.10E-06   | -0.3849112 | 0.896 | 1     | 0.00219131 | 5 |
| IGKC        | 5.85E-06   | -0.3391882 | 0.514 | 0.942 | 0.01170491 | 5 |
| IGKV1-8     | 6.74E-06   | 0.445997   | 0.012 | 0.421 | 0.01348259 | 5 |
| MTSS1       | 1.64E-05   | -0.2995488 | 0.409 | 0.805 | 0.03275084 | 5 |
| RHOB2       | 2.04E-05   | -0.3143183 | 0.253 | 0.709 | 0.04084428 | 5 |
| JUND3       | 2.05E-05   | -0.5906268 | 0.188 | 0.647 | 0.0409896  | 5 |
| AL138963.32 | 4.71E-05   | 0.29029922 | 0.438 | 0.914 | 0.09417045 | 5 |
| PRDX2       | 5.95E-05   | 0.26372383 | 0.284 | 0.774 | 0.1189017  | 5 |
| MYADM1      | 8.62E-05   | -0.7257475 | 0.088 | 0.462 | 0.17245474 | 5 |
| SAT1        | 0.000116   | -0.3232481 | 0.623 | 0.938 | 0.2320095  | 5 |
| IGKV1-5     | 0.00021168 | 0.89442335 | 0.058 | 0.442 | 0.42335392 | 5 |
| AHNAK1      | 0.00028738 | -0.4464127 | 0.476 | 0.822 | 0.57476921 | 5 |
| IGKV3-15    | 0.00041208 | 0.53683749 | 0.066 | 0.589 | 0.82415289 | 5 |
| HSP90AB1    | 0.00076154 | -0.2796635 | 0.862 | 0.932 | 1          | 5 |
| MEF2C       | 0.00639612 | -0.3361942 | 0.665 | 0.976 | 1          | 5 |
| S100A10     | 0.00642827 | 0.3384621  | 0.425 | 0.87  | 1          | 5 |
| IGHV7-4-1   | 0.0069136  | 0.38454771 | 0.016 | 0.445 | 1          | 5 |
| IGLV3-21    | 0.00702676 | 0.74889379 | 0.043 | 0.548 | 1          | 5 |
| AFF3        | 0.00914317 | -0.2688747 | 0.493 | 0.805 | 1          | 5 |
| HNRNPA2B12  | 0.00966174 | -0.3717999 | 0.926 | 1     | 1          | 5 |
| CD79A       | 0.01223322 | -0.2660709 | 0.977 | 1     | 1          | 5 |
| LYN         | 0.03643494 | -0.2679394 | 0.617 | 0.866 | 1          | 5 |
| IGHV4-31    | 0.03846682 | 0.4117555  | 0.032 | 0.466 | 1          | 5 |
| NPM1        | 0.05439328 | -0.2862692 | 0.901 | 1     | 1          | 5 |
| FOS2        | 0.07532688 | -0.3680612 | 0.505 | 0.743 | 1          | 5 |
| OAZ11       | 0.09471499 | -0.2703634 | 0.952 | 1     | 1          | 5 |
| HSPA53      | 0.25894756 | -0.505817  | 0.334 | 0.654 | 1          | 5 |
| CST71       | 0.32680307 | 0.26784653 | 0.065 | 0.144 | 1          | 5 |
| IGKV3-11    | 0.36604518 | 1.28028451 | 0.063 | 0.517 | 1          | 5 |
| VIM         | 0.36713881 | -0.281667  | 0.827 | 1     | 1          | 5 |
| LINC00926   | 0.42845851 | -0.2588477 | 0.815 | 0.973 | 1          | 5 |
| TNF2        | 0.4608347  | -0.3348514 | 0.04  | 0.476 | 1          | 5 |
| HMG1        | 0.48007721 | -0.2893882 | 0.856 | 0.962 | 1          | 5 |
| HLA-DRB51   | 0.6197465  | -0.2621572 | 0.979 | 1     | 1          | 5 |
| GADD45B     | 0.78895649 | -0.4007044 | 0.234 | 0.596 | 1          | 5 |
| CD83        | 0.83356775 | -0.504354  | 0.373 | 0.616 | 1          | 5 |
| S100A41     | 0.83700525 | 0.53783331 | 0.374 | 0.75  | 1          | 5 |
| ATF32       | 0.8554649  | -0.2542605 | 0.01  | 0.469 | 1          | 5 |
| TRBV10-31   | 2.37E-102  | 0.26619211 | 0.014 | 0.731 | 4.74E-99   | 6 |
| TRAV212     | 3.76E-77   | 0.31321915 | 0.065 | 0.925 | 7.52E-74   | 6 |
| TRBV7-22    | 2.58E-75   | 0.4129458  | 0.051 | 0.892 | 5.16E-72   | 6 |
| TRBV7-6     | 1.28E-73   | 0.2990959  | 0.053 | 0.892 | 2.56E-70   | 6 |
| TRBV91      | 6.60E-66   | 0.25285933 | 0.045 | 0.849 | 1.32E-62   | 6 |
| AC103591.35 | 4.02E-60   | -0.7099259 | 0.041 | 0.204 | 8.04E-57   | 6 |
| TRBV7-92    | 1.73E-56   | 0.41036805 | 0.074 | 0.882 | 3.46E-53   | 6 |
| S100A82     | 1.12E-55   | -0.3977911 | 0.017 | 0.237 | 2.24E-52   | 6 |
| TRBV4-21    | 2.43E-55   | 0.53785253 | 0.07  | 0.871 | 4.87E-52   | 6 |
| PCSKIN      | 1.29E-52   | -0.3317614 | 0.107 | 0.914 | 2.57E-49   | 6 |
| TRBV4-12    | 1.40E-47   | 0.52852934 | 0.038 | 0.215 | 2.80E-44   | 6 |
| TRBV5-6     | 8.54E-43   | 0.27814305 | 0.037 | 0.72  | 1.71E-39   | 6 |
| BACH21      | 8.24E-19   | -0.2964051 | 0.237 | 0.892 | 1.65E-15   | 6 |
| TRBV281     | 2.04E-15   | 0.296553   | 0.041 | 0.656 | 4.07E-12   | 6 |
| TRBV20-12   | 1.50E-13   | 0.45777443 | 0.055 | 0.677 | 3.00E-10   | 6 |
| NFKB1A2     | 1.75E-12   | -0.4757443 | 0.289 | 0.849 | 3.51E-09   | 6 |
| IFI44L5     | 3.24E-12   | -0.2684491 | 0.009 | 0.226 | 6.48E-09   | 6 |
| TRBV27      | 2.99E-11   | 0.38501748 | 0.079 | 0.688 | 5.97E-08   | 6 |
| STAT13      | 4.34E-10   | 0.30877914 | 0.337 | 1     | 8.67E-07   | 6 |
| MT2A4       | 5.25E-09   | -0.3619804 | 0.395 | 0.978 | 1.05E-05   | 6 |
| TRBV12-43   | 0.00031286 | 0.36318431 | 0.056 | 0.602 | 0.62572917 | 6 |
| SNRPD3      | 0.00115234 | 0.26646303 | 0.419 | 1     | 1          | 6 |
| TRBV6-52    | 0.00176573 | 0.52681256 | 0.068 | 0.602 | 1          | 6 |
| MT-ATP8     | 0.02069723 | 0.26843721 | 0.802 | 0.968 | 1          | 6 |
| TRBC1       | 0.10146074 | 0.25448794 | 0.521 | 1     | 1          | 6 |
| ZFP361.22   | 0.32572252 | -0.3391496 | 0.935 | 1     | 1          | 6 |
| AL138963.33 | 0.50192939 | 0.43575788 | 0.571 | 0.957 | 1          | 6 |
| AIFI        | 0.81901004 | 0.2681274  | 0.571 | 0.968 | 1          | 6 |
| MRPL3       | 1.11E-121  | -0.2503833 | 0.008 | 0.986 | 2.22E-118  | 7 |
| JAML1       | 4.08E-101  | 0.29790669 | 0.051 | 0.993 | 8.17E-98   | 7 |
| PTGDR       | 3.45E-98   | 0.41601604 | 0.061 | 0.997 | 6.89E-95   | 7 |
| IGKV2D-291  | 4.46E-98   | 0.65581669 | 0.061 | 0.997 | 8.93E-95   | 7 |
| SIRPG       | 4.24E-97   | 0.31055668 | 0.056 | 0.99  | 8.49E-94   | 7 |
| FKBP2       | 7.55E-96   | 0.32940082 | 0.059 | 0.99  | 1.51E-92   | 7 |
| CD8B1       | 6.05E-95   | 0.33062605 | 0.066 | 0.997 | 1.21E-91   | 7 |
| IFNG-AS1    | 7.61E-95   | 0.28231516 | 0.069 | 1     | 1.52E-91   | 7 |
| CST3        | 3.64E-93   | -0.2606239 | 0.024 | 0.942 | 7.28E-90   | 7 |
| ACTN1       | 3.66E-93   | 0.43718903 | 0.064 | 0.99  | 7.33E-90   | 7 |
| KLRB12      | 5.75E-90   | 0.27578382 | 0.077 | 0.997 | 1.15E-86   | 7 |
| MRPL13      | 7.73E-90   | -0.2935874 | 0.019 | 0.928 | 1.55E-86   | 7 |
| CSTB        | 1.06E-89   | 0.27604196 | 0.074 | 0.993 | 2.12E-86   | 7 |
| NUCB2       | 6.08E-89   | 0.27533903 | 0.08  | 0.997 | 1.22E-85   | 7 |
| IGHV3-71    | 6.48E-86   | 0.47971952 | 0.032 | 0.838 | 1.30E-82   | 7 |
| NAAA        | 2.66E-85   | 0.25926853 | 0.088 | 0.997 | 5.32E-82   | 7 |
| CD82        | 1.28E-84   | 0.38202973 | 0.066 | 0.962 | 2.56E-81   | 7 |

|             |            |            |       |       |            |   |
|-------------|------------|------------|-------|-------|------------|---|
| AL138963.34 | 2.37E-83   | 0.53929897 | 0.093 | 0.997 | 4.74E-80   | 7 |
| GPR183      | 1.38E-80   | -0.3964549 | 0.085 | 0.973 | 2.76E-77   | 7 |
| HIST1H2BC   | 4.59E-79   | 0.52451721 | 0.101 | 0.997 | 9.17E-76   | 7 |
| PARP1       | 2.27E-77   | 0.37550103 | 0.109 | 1     | 4.55E-74   | 7 |
| HIST1H2BJ   | 2.73E-77   | 0.32319877 | 0.051 | 0.931 | 5.46E-74   | 7 |
| IL4R        | 3.94E-77   | -0.2506598 | 0.048 | 0.928 | 7.87E-74   | 7 |
| NCF1        | 4.92E-77   | 0.36241964 | 0.037 | 0.12  | 9.84E-74   | 7 |
| HIST1H2AG   | 1.08E-76   | 0.35280577 | 0.109 | 0.997 | 2.16E-73   | 7 |
| CD27        | 5.39E-73   | 0.28570818 | 0.114 | 0.993 | 1.08E-69   | 7 |
| FGFBP21     | 5.47E-73   | -0.3163949 | 0.019 | 0.704 | 1.09E-69   | 7 |
| GZMK1       | 7.50E-73   | 0.74293103 | 0.12  | 1     | 1.50E-69   | 7 |
| CDC25B      | 3.19E-72   | 0.36946583 | 0.122 | 1     | 6.37E-69   | 7 |
| UTY1        | 1.11E-71   | -0.482392  | 0     | 0.127 | 2.21E-68   | 7 |
| POU2F2      | 3.30E-70   | 0.25506371 | 0.098 | 0.966 | 6.60E-67   | 7 |
| CD38        | 7.06E-70   | -0.3175979 | 0.019 | 0.708 | 1.41E-66   | 7 |
| CRIP2       | 8.88E-68   | 0.26008171 | 0.035 | 0.835 | 1.78E-64   | 7 |
| LYZ         | 4.97E-67   | -0.447783  | 0.024 | 0.876 | 9.95E-64   | 7 |
| ILK         | 1.17E-65   | 0.25460483 | 0.051 | 0.9   | 2.34E-62   | 7 |
| NUDT5       | 4.04E-64   | 0.34316331 | 0.056 | 0.893 | 8.08E-61   | 7 |
| NELL21      | 8.47E-64   | 0.26683756 | 0.146 | 1     | 1.69E-60   | 7 |
| HIST1H2AC   | 1.19E-63   | 0.50324514 | 0.128 | 0.979 | 2.37E-60   | 7 |
| CNN2        | 2.86E-60   | 0.32475379 | 0.133 | 0.973 | 5.73E-57   | 7 |
| KLRG1       | 5.83E-60   | 0.37947635 | 0.152 | 0.993 | 1.17E-56   | 7 |
| CUX1        | 6.56E-58   | 0.37048513 | 0.066 | 0.893 | 1.31E-54   | 7 |
| CCR7        | 1.14E-57   | 0.26399843 | 0.117 | 0.945 | 2.29E-54   | 7 |
| EGR11       | 1.26E-57   | 0.53163752 | 0.16  | 0.997 | 2.52E-54   | 7 |
| FCRL3       | 3.84E-57   | 0.30447054 | 0.043 | 0.667 | 7.68E-54   | 7 |
| ANXA61      | 2.28E-55   | 0.37239365 | 0.17  | 1     | 4.56E-52   | 7 |
| CCL42       | 3.56E-54   | -0.3272253 | 0.019 | 0.612 | 7.13E-51   | 7 |
| ATP2B1-AS1  | 6.06E-54   | 0.43523112 | 0.112 | 0.928 | 1.21E-50   | 7 |
| PASK        | 1.19E-52   | 0.40956294 | 0.066 | 0.876 | 2.38E-49   | 7 |
| FCGR3A1     | 3.55E-52   | -0.3632481 | 0.019 | 0.656 | 7.10E-49   | 7 |
| GART        | 6.50E-52   | 0.25379463 | 0.088 | 0.746 | 1.30E-48   | 7 |
| ITGB7       | 7.56E-52   | 0.30521509 | 0.181 | 0.997 | 1.51E-48   | 7 |
| SNRPG       | 7.57E-52   | 0.29871532 | 0.061 | 0.196 | 1.51E-48   | 7 |
| FCMR        | 1.49E-48   | 0.58656698 | 0.189 | 1     | 2.98E-45   | 7 |
| LIMS1       | 8.90E-48   | 0.56254916 | 0.093 | 0.887 | 1.78E-44   | 7 |
| TRBC2       | 1.06E-47   | 0.59038387 | 0.191 | 0.997 | 2.11E-44   | 7 |
| TUBA1B      | 3.26E-47   | 0.54708924 | 0.191 | 0.997 | 6.51E-44   | 7 |
| HSP90B12    | 2.69E-46   | -0.2834172 | 0.215 | 1     | 5.39E-43   | 7 |
| TSHZ2       | 4.79E-44   | -0.2580042 | 0.04  | 0.216 | 9.59E-41   | 7 |
| ITGAX1      | 7.86E-44   | -0.3612051 | 0.003 | 0.134 | 1.57E-40   | 7 |
| GBP51       | 3.00E-42   | -0.3743358 | 0.229 | 0.997 | 5.99E-39   | 7 |
| DAAMI       | 7.56E-42   | 0.27064904 | 0.037 | 0.533 | 1.51E-38   | 7 |
| CD3D2       | 1.16E-41   | 0.44144422 | 0.165 | 0.938 | 2.33E-38   | 7 |
| TRBV6-53    | 2.98E-41   | 0.28028893 | 0.019 | 0.495 | 5.95E-38   | 7 |
| TXNDC11     | 3.43E-41   | -0.270817  | 0.051 | 0.23  | 6.85E-38   | 7 |
| PSMB91      | 7.19E-41   | 0.53478321 | 0.218 | 1     | 1.44E-37   | 7 |
| S100A9      | 1.32E-40   | -0.6294733 | 0.037 | 0.23  | 2.63E-37   | 7 |
| GRAP2       | 1.22E-37   | 0.2514219  | 0.104 | 0.856 | 2.44E-34   | 7 |
| TRAC        | 3.18E-35   | 0.30909823 | 0.106 | 0.849 | 6.36E-32   | 7 |
| TRBV4-22    | 2.20E-34   | 0.32812677 | 0.027 | 0.546 | 4.40E-31   | 7 |
| LAT         | 3.30E-34   | 0.41731522 | 0.221 | 0.969 | 6.59E-31   | 7 |
| HIST1H4C    | 2.49E-33   | 0.60809189 | 0.245 | 0.997 | 4.97E-30   | 7 |
| SPON21      | 3.13E-33   | -0.3849254 | 0.029 | 0.759 | 6.27E-30   | 7 |
| LDHB        | 5.07E-33   | 0.34357369 | 0.237 | 0.979 | 1.01E-29   | 7 |
| TCF72       | 1.87E-31   | 0.63467774 | 0.255 | 1     | 3.73E-28   | 7 |
| ITGB11      | 1.37E-30   | 0.38718419 | 0.16  | 0.876 | 2.74E-27   | 7 |
| ID2         | 7.58E-30   | 0.32225364 | 0.109 | 0.289 | 1.52E-26   | 7 |
| NOSIP1      | 2.52E-28   | 0.5611738  | 0.269 | 1     | 5.03E-25   | 7 |
| S100A83     | 3.28E-28   | -0.8483846 | 0.027 | 0.278 | 6.57E-25   | 7 |
| GNLY3       | 2.11E-27   | -0.3254654 | 0.104 | 0.804 | 4.21E-24   | 7 |
| DENND2D     | 3.28E-27   | 0.60476343 | 0.125 | 0.832 | 6.57E-24   | 7 |
| SAMHD1      | 2.08E-25   | 0.43477426 | 0.239 | 0.34  | 4.17E-22   | 7 |
| ARMH1       | 1.02E-24   | 0.32392942 | 0.069 | 0.766 | 2.04E-21   | 7 |
| FOSB2       | 4.51E-23   | 0.25824956 | 0.306 | 0.997 | 9.01E-20   | 7 |
| LYST1       | 8.46E-23   | 0.27158343 | 0.088 | 0.32  | 1.69E-19   | 7 |
| IFI44L6     | 7.81E-22   | -0.6406064 | 0.011 | 0.179 | 1.56E-18   | 7 |
| PPM1G       | 3.66E-21   | 0.27673661 | 0.064 | 0.323 | 7.33E-18   | 7 |
| TNF3        | 6.72E-20   | -0.3290431 | 0.048 | 0.203 | 1.34E-16   | 7 |
| MTRNR2L8    | 5.12E-19   | -0.7043454 | 0.12  | 0.763 | 1.02E-15   | 7 |
| KLRD11      | 1.88E-18   | -0.4181619 | 0.059 | 0.698 | 3.76E-15   | 7 |
| EPRS        | 1.09E-17   | 0.2571701  | 0.061 | 0.722 | 2.19E-14   | 7 |
| PLEC        | 2.40E-17   | 0.51465753 | 0.168 | 0.811 | 4.79E-14   | 7 |
| LDHA        | 8.13E-16   | 0.40289309 | 0.165 | 0.797 | 1.63E-12   | 7 |
| Z93241.11   | 1.17E-15   | 0.63694493 | 0.093 | 0.735 | 2.35E-12   | 7 |
| ENO1        | 1.50E-15   | 0.32167384 | 0.12  | 0.756 | 3.00E-12   | 7 |
| EPST111     | 2.08E-15   | -0.3892433 | 0.021 | 0.677 | 4.16E-12   | 7 |
| ADGRG11     | 6.53E-14   | -0.250184  | 0.016 | 0.502 | 1.31E-10   | 7 |
| H2AFY       | 6.18E-11   | -0.2836647 | 0.064 | 0.677 | 1.24E-07   | 7 |
| PMAIP12     | 1.53E-10   | -0.4178722 | 0.072 | 0.677 | 3.07E-07   | 7 |
| IFIT23      | 3.19E-10   | -0.8531558 | 0.008 | 0.186 | 6.38E-07   | 7 |
| CST72       | 5.97E-10   | 0.53964639 | 0.098 | 0.409 | 1.19E-06   | 7 |
| TGFBR31     | 2.65E-09   | 0.36118892 | 0.098 | 0.691 | 5.29E-06   | 7 |
| DUSP21      | 5.43E-09   | 0.63123685 | 0.301 | 0.866 | 1.09E-05   | 7 |
| NFKB1Z4     | 1.82E-08   | -0.5711535 | 0.191 | 0.725 | 3.64E-05   | 7 |
| MIF         | 4.48E-08   | 0.30741737 | 0.149 | 0.718 | 8.96E-05   | 7 |
| CYB5D2      | 7.30E-08   | 0.31785975 | 0.024 | 0.399 | 0.00014602 | 7 |
| CD3G1       | 3.66E-07   | 0.27249712 | 0.117 | 0.684 | 0.0007316  | 7 |
| TKT         | 3.74E-07   | -0.2788138 | 0.021 | 0.612 | 0.00074802 | 7 |
| OASL2       | 1.03E-06   | -0.745938  | 0.005 | 0.237 | 0.00205744 | 7 |
| CPNE3       | 1.13E-06   | 0.27369141 | 0.045 | 0.629 | 0.00226092 | 7 |
| SLC25A39    | 3.76E-06   | 0.27091951 | 0.048 | 0.625 | 0.00751319 | 7 |
| CD28        | 2.17E-05   | 0.35536578 | 0.09  | 0.45  | 0.04332199 | 7 |
| GADD45B1    | 2.54E-05   | 0.25305458 | 0.194 | 0.718 | 0.05084547 | 7 |
| IFI6        | 4.38E-05   | -0.3882196 | 0.019 | 0.433 | 0.087505   | 7 |
| TRGV3       | 0.00012477 | 0.28967059 | 0.04  | 0.392 | 0.2495396  | 7 |
| IL322       | 0.00028022 | 0.5284176  | 0.404 | 0.904 | 0.56043322 | 7 |

|             |            |            |       |       |            |    |
|-------------|------------|------------|-------|-------|------------|----|
| MX11        | 0.00077273 | -0.2775214 | 0.061 | 0.584 | 1          | 7  |
| LTB1        | 0.00081408 | 0.60435159 | 0.468 | 0.997 | 1          | 7  |
| TOB12       | 0.00130689 | -0.3253255 | 0.045 | 0.591 | 1          | 7  |
| HSPA54      | 0.00226058 | -0.3174125 | 0.184 | 0.667 | 1          | 7  |
| HERC51      | 0.00637737 | -0.8459808 | 0.024 | 0.433 | 1          | 7  |
| ZEB22       | 0.00725408 | -0.4335139 | 0.061 | 0.467 | 1          | 7  |
| STAT14      | 0.0079522  | 0.27040986 | 0.098 | 0.612 | 1          | 7  |
| SAT11       | 0.00854593 | 0.68357608 | 0.415 | 0.68  | 1          | 7  |
| IL7R2       | 0.02152238 | 0.25392088 | 0.537 | 1     | 1          | 7  |
| CD691       | 0.03243085 | 0.39680869 | 0.322 | 0.773 | 1          | 7  |
| DUSP1       | 0.05552082 | 0.30695538 | 0.335 | 0.753 | 1          | 7  |
| TRBC11      | 0.06429771 | 0.4879539  | 0.154 | 0.632 | 1          | 7  |
| FOS3        | 0.1203164  | 0.26543543 | 0.394 | 0.784 | 1          | 7  |
| ACTB1       | 0.1447904  | -0.3032635 | 0.694 | 1     | 1          | 7  |
| PRDX21      | 0.19091366 | 0.26545492 | 0.045 | 0.495 | 1          | 7  |
| S100A42     | 0.25711951 | 0.33485589 | 0.181 | 0.625 | 1          | 7  |
| PRDM11      | 0.41061714 | -0.6743025 | 0.064 | 0.546 | 1          | 7  |
| IFIT33      | 0.71326759 | -0.8083303 | 0.005 | 0.127 | 1          | 7  |
| JUN         | 0.92327124 | 0.30725206 | 0.617 | 0.945 | 1          | 7  |
| GZMH1       | 0.97939321 | -0.2532781 | 0.024 | 0.488 | 1          | 7  |
| ZFP36L23    | 0.98914345 | -0.3341457 | 0.699 | 0.997 | 1          | 7  |
| PPBP1       | 4.39E-52   | -0.45378   | 0.006 | 0.142 | 8.78E-49   | 8  |
| IGLV3-191   | 2.94E-45   | -0.2940756 | 0.003 | 0.52  | 5.87E-42   | 8  |
| CD3D3       | 1.68E-43   | 0.28641166 | 0.128 | 0.961 | 3.36E-40   | 8  |
| IL7R3       | 1.54E-39   | 0.58490061 | 0.155 | 1     | 3.07E-36   | 8  |
| IL323       | 3.35E-35   | 0.61069863 | 0.172 | 1     | 6.71E-32   | 8  |
| IFI271      | 3.22E-30   | -0.7248904 | 0.003 | 0.181 | 6.43E-27   | 8  |
| AC020916.1  | 3.68E-28   | -0.2747791 | 0.055 | 0.236 | 7.36E-25   | 8  |
| LYPD2       | 3.63E-26   | 0.38996714 | 0.187 | 0.913 | 7.27E-23   | 8  |
| KCNMA1      | 3.54E-22   | -0.2982152 | 0.032 | 0.756 | 7.09E-19   | 8  |
| CXCL81      | 1.79E-21   | -0.4120133 | 0.015 | 0.276 | 3.57E-18   | 8  |
| GNLY4       | 1.17E-20   | 0.35468535 | 0.044 | 0.756 | 2.35E-17   | 8  |
| PHACTR11    | 5.07E-20   | -0.28274   | 0.073 | 0.283 | 1.01E-16   | 8  |
| CCL43       | 9.12E-19   | -0.5907842 | 0.02  | 0.291 | 1.82E-15   | 8  |
| CD163       | 7.99E-18   | -0.2776436 | 0.023 | 0.299 | 1.60E-14   | 8  |
| CLEC10A     | 1.30E-17   | -0.2670204 | 0.058 | 0.732 | 2.60E-14   | 8  |
| TCN2        | 3.27E-14   | -0.3358674 | 0.05  | 0.323 | 6.54E-11   | 8  |
| VMO1        | 1.16E-13   | 0.40054903 | 0.297 | 0.969 | 2.31E-10   | 8  |
| IER3        | 4.59E-13   | -0.304625  | 0.017 | 0.331 | 9.18E-10   | 8  |
| CCL4L21     | 5.27E-13   | -0.4399821 | 0.003 | 0.331 | 1.05E-09   | 8  |
| EGR12       | 5.75E-13   | -0.3528946 | 0.058 | 0.331 | 1.15E-09   | 8  |
| RNASE6      | 1.57E-12   | -0.2717303 | 0.047 | 0.339 | 3.13E-09   | 8  |
| HES1        | 2.67E-12   | -0.2552676 | 0.035 | 0.339 | 5.35E-09   | 8  |
| RGCC1       | 1.29E-10   | -0.2770291 | 0.058 | 0.354 | 2.58E-07   | 8  |
| LMNA2       | 9.58E-09   | -0.3667511 | 0.044 | 0.37  | 1.92E-05   | 8  |
| IFITM21     | 2.90E-08   | 0.40823532 | 0.983 | 0.969 | 5.79E-05   | 8  |
| CCL53       | 3.05E-07   | 0.29319513 | 0.07  | 0.669 | 0.00061098 | 8  |
| CD741       | 5.85E-07   | -0.3542407 | 1     | 1     | 0.00116914 | 8  |
| ADMI        | 1.27E-06   | -0.3113121 | 0.05  | 0.394 | 0.00254745 | 8  |
| CCL33       | 3.08E-06   | -0.661229  | 0.041 | 0.394 | 0.00615216 | 8  |
| PECAM1      | 4.31E-06   | 0.3555294  | 0.892 | 0.992 | 0.00861924 | 8  |
| LDHA1       | 2.01E-05   | 0.28485046 | 0.723 | 0.677 | 0.04022345 | 8  |
| CKB         | 2.21E-05   | 0.25031503 | 0.426 | 1     | 0.04424971 | 8  |
| HLA-DRA2    | 5.37E-05   | -0.3540023 | 0.988 | 1     | 0.10747117 | 8  |
| LGALS2      | 7.20E-05   | -0.4568111 | 0.111 | 0.425 | 0.14406616 | 8  |
| IL1B        | 7.91E-05   | -0.4397307 | 0.07  | 0.417 | 0.15814419 | 8  |
| HLA-DRB13   | 0.00028554 | -0.3925658 | 0.991 | 1     | 0.57108975 | 8  |
| LYZ1        | 0.00029761 | -0.4301608 | 0.985 | 0.992 | 0.59522904 | 8  |
| HLA-DMA     | 0.00032139 | -0.3574616 | 0.598 | 0.89  | 0.64278968 | 8  |
| LILRA5      | 0.00038314 | 0.29855867 | 0.741 | 0.787 | 0.76627253 | 8  |
| H2AFY1      | 0.00043927 | -0.2978456 | 0.711 | 0.89  | 0.8785497  | 8  |
| IFITM31     | 0.00090554 | 0.25008099 | 0.985 | 0.992 | 1          | 8  |
| IGSF6       | 0.00116183 | -0.3434514 | 0.755 | 0.984 | 1          | 8  |
| PSME2       | 0.00141025 | -0.2719866 | 0.854 | 1     | 1          | 8  |
| CD36        | 0.00157574 | -0.3363083 | 0.16  | 0.465 | 1          | 8  |
| SHTN1       | 0.00182712 | -0.3620061 | 0.07  | 0.441 | 1          | 8  |
| HLA-DPB11   | 0.0048636  | -0.3473499 | 0.956 | 1     | 1          | 8  |
| CDKN1C      | 0.00488476 | 0.2887534  | 0.711 | 0.976 | 1          | 8  |
| TNFSF101    | 0.00510543 | 0.31292921 | 0.662 | 1     | 1          | 8  |
| HLA-DPA12   | 0.00840381 | -0.2902428 | 0.991 | 1     | 1          | 8  |
| C1QA        | 0.00962767 | -0.8430836 | 0.175 | 0.646 | 1          | 8  |
| MNDA1       | 0.01134543 | -0.2804017 | 0.659 | 1     | 1          | 8  |
| C1QC        | 0.01201592 | -0.751988  | 0.035 | 0.535 | 1          | 8  |
| BLVRB       | 0.01896232 | -0.2791873 | 0.478 | 0.772 | 1          | 8  |
| PTPRE1      | 0.02857763 | -0.361463  | 0.332 | 0.709 | 1          | 8  |
| CRTAP       | 0.03135109 | -0.3611522 | 0.274 | 0.669 | 1          | 8  |
| ALI38963.35 | 0.041132   | 0.29276228 | 0.522 | 1     | 1          | 8  |
| MS4A6A      | 0.04301    | -0.5108876 | 0.283 | 0.646 | 1          | 8  |
| ATP2B1-AS11 | 0.07251332 | -0.2787352 | 0.665 | 0.85  | 1          | 8  |
| ODF3B       | 0.14180558 | -0.2525511 | 0.335 | 0.709 | 1          | 8  |
| MT-ND6      | 0.17633956 | 0.30899563 | 0.665 | 1     | 1          | 8  |
| MSLN        | 0.17950374 | 0.59179975 | 0.551 | 1     | 1          | 8  |
| LY86        | 0.22124908 | -0.3415206 | 0.306 | 0.654 | 1          | 8  |
| TNFAIP33    | 0.23608702 | -0.2516539 | 0.128 | 0.512 | 1          | 8  |
| MARCO       | 0.23613043 | -0.2624675 | 0.155 | 0.528 | 1          | 8  |
| CD14        | 0.2378579  | -0.4119299 | 0.248 | 0.551 | 1          | 8  |
| RETN        | 0.24850318 | 0.25390923 | 0.539 | 1     | 1          | 8  |
| NKG72       | 0.26257825 | 0.2510923  | 0.236 | 0.591 | 1          | 8  |
| SGK11       | 0.46678066 | -0.498148  | 0.152 | 0.575 | 1          | 8  |
| LINC02432   | 0.4978558  | 0.27593339 | 0.455 | 0.89  | 1          | 8  |
| G0S21       | 0.50895912 | -0.5676889 | 0.041 | 0.496 | 1          | 8  |
| CD79B       | 0.58730033 | 0.29558162 | 0.507 | 0.937 | 1          | 8  |
| LDHB1       | 0.61359077 | 0.28979178 | 0.437 | 0.764 | 1          | 8  |
| DDIT41      | 0.62950357 | -0.2663209 | 0.149 | 0.567 | 1          | 8  |
| C1QB        | 0.68808378 | -1.1120133 | 0.047 | 0.504 | 1          | 8  |
| MT2A5       | 0.73182535 | -0.6588095 | 0.767 | 0.803 | 1          | 8  |
| PLBD1       | 0.99666033 | -0.2738081 | 0.248 | 0.591 | 1          | 8  |
| MAP7        | 1.57E-53   | -0.3617759 | 0.008 | 0.952 | 3.14E-50   | 10 |

|             |            |            |       |       |            |    |
|-------------|------------|------------|-------|-------|------------|----|
| HIST1H2AM   | 2.81E-33   | -0.2658328 | 0.034 | 0.952 | 5.61E-30   | 10 |
| TRBV6-23    | 9.94E-27   | 0.28313826 | 0.053 | 0.952 | 1.99E-23   | 10 |
| GPR82       | 6.53E-26   | -0.3503892 | 0.05  | 0.905 | 1.31E-22   | 10 |
| IER31       | 4.02E-23   | -0.3253342 | 0.027 | 0.857 | 8.05E-20   | 10 |
| MAP1A       | 3.72E-21   | -0.3259339 | 0     | 0.333 | 7.45E-18   | 10 |
| SI00A91     | 7.98E-21   | 0.27394951 | 0.065 | 0.143 | 1.60E-17   | 10 |
| TRBV20-13   | 1.87E-20   | 0.44413312 | 0.08  | 0.952 | 3.74E-17   | 10 |
| SI00A84     | 3.01E-20   | 0.66972507 | 0.027 | 0.19  | 6.01E-17   | 10 |
| TRBV7-93    | 5.13E-20   | 0.34620254 | 0.031 | 0.667 | 1.03E-16   | 10 |
| TRGC21      | 3.52E-19   | -0.4645727 | 0.069 | 0.905 | 7.04E-16   | 10 |
| TRBV192     | 4.91E-19   | 0.59967594 | 0.088 | 0.952 | 9.83E-16   | 10 |
| LYZ2        | 4.91E-19   | 0.26234473 | 0.088 | 0.952 | 9.83E-16   | 10 |
| HERCS2      | 1.72E-18   | -0.2781454 | 0.084 | 0.143 | 3.44E-15   | 10 |
| TCF4        | 2.21E-16   | -0.3970433 | 0.023 | 0.762 | 4.42E-13   | 10 |
| RBBP8       | 2.19E-15   | -0.483899  | 0.023 | 0.238 | 4.38E-12   | 10 |
| ID3         | 6.32E-15   | -0.6475982 | 0.107 | 0.905 | 1.26E-11   | 10 |
| TYMP1       | 9.29E-15   | -0.2583287 | 0.069 | 0.857 | 1.86E-11   | 10 |
| GRASP2      | 2.31E-14   | -0.3810804 | 0.031 | 0.238 | 4.61E-11   | 10 |
| TRBV4-23    | 1.07E-13   | 0.25770226 | 0.027 | 0.429 | 2.13E-10   | 10 |
| GLUL        | 1.24E-13   | -0.2677067 | 0.099 | 0.19  | 2.49E-10   | 10 |
| KIR2DL4     | 6.89E-13   | -0.7047543 | 0.156 | 0.952 | 1.38E-09   | 10 |
| CHMP1B      | 1.93E-12   | -0.3674263 | 0.145 | 0.952 | 3.87E-09   | 10 |
| SOX41       | 2.29E-12   | -0.3080294 | 0.141 | 0.952 | 4.58E-09   | 10 |
| IGFBP2      | 4.47E-12   | -0.2630343 | 0.008 | 0.19  | 8.94E-09   | 10 |
| CD8B2       | 6.44E-12   | 0.57099106 | 0.168 | 1     | 1.29E-08   | 10 |
| IFIT24      | 1.14E-11   | -0.7016946 | 0.065 | 0.238 | 2.28E-08   | 10 |
| FES         | 1.25E-11   | -0.5791763 | 0.187 | 1     | 2.50E-08   | 10 |
| SYK         | 2.09E-11   | -0.3102867 | 0.191 | 1     | 4.19E-08   | 10 |
| EBNA1BP2    | 4.12E-11   | -0.2897398 | 0.164 | 0.952 | 8.24E-08   | 10 |
| SIRPG1      | 5.61E-11   | 0.33754661 | 0.233 | 0.19  | 1.12E-07   | 10 |
| TRGV91      | 3.00E-10   | 0.25104613 | 0.187 | 1     | 6.00E-07   | 10 |
| KIR3DL2     | 3.78E-10   | 0.32519755 | 0.164 | 0.238 | 7.55E-07   | 10 |
| SPTSSB      | 6.09E-10   | -0.5668946 | 0.24  | 1     | 1.22E-06   | 10 |
| PPBP2       | 8.69E-10   | -0.4266043 | 0     | 0.143 | 1.74E-06   | 10 |
| LIPA        | 1.98E-09   | -0.4244434 | 0.225 | 1     | 3.97E-06   | 10 |
| SIT1        | 2.84E-09   | 0.26372378 | 0.187 | 0.952 | 5.68E-06   | 10 |
| OASL3       | 4.71E-09   | -0.4363045 | 0.05  | 0.286 | 9.41E-06   | 10 |
| ELL22       | 4.73E-09   | -0.2947218 | 0.053 | 0.286 | 9.47E-06   | 10 |
| MAL         | 6.20E-09   | 0.51955619 | 0.328 | 0.238 | 1.24E-05   | 10 |
| BID         | 7.22E-09   | 0.31258147 | 0.233 | 0.238 | 1.44E-05   | 10 |
| STMN1       | 1.45E-08   | 0.28121152 | 0.21  | 1     | 2.90E-05   | 10 |
| SIPR5       | 4.05E-08   | 0.43602598 | 0.347 | 0.238 | 8.10E-05   | 10 |
| TNFRSF18    | 1.23E-07   | -0.5689031 | 0.271 | 0.952 | 0.00024515 | 10 |
| IGFBP4      | 1.32E-07   | -0.5110765 | 0.24  | 0.952 | 0.00026486 | 10 |
| PLEC1       | 1.90E-07   | -0.2628579 | 0.134 | 0.286 | 0.00038044 | 10 |
| GZMH2       | 2.30E-07   | 0.26580581 | 0.324 | 0.238 | 0.00045955 | 10 |
| IFIT34      | 2.90E-07   | -0.665424  | 0.019 | 0.333 | 0.00058069 | 10 |
| NOP56       | 6.03E-07   | 0.25044677 | 0.237 | 1     | 0.0012059  | 10 |
| SPINT2      | 6.72E-07   | 0.25165066 | 0.168 | 0.762 | 0.00134386 | 10 |
| ARMH11      | 7.89E-07   | 0.26618178 | 0.137 | 0.714 | 0.00157771 | 10 |
| MCM3        | 8.14E-07   | 0.25328223 | 0.21  | 0.952 | 0.00162743 | 10 |
| ATP2B1-AS12 | 1.56E-06   | -0.6453468 | 0.275 | 1     | 0.0031189  | 10 |
| MARCKSL1    | 2.07E-06   | 0.3211534  | 0.218 | 0.952 | 0.0041421  | 10 |
| GRAP21      | 2.07E-06   | 0.28975104 | 0.218 | 0.952 | 0.0041421  | 10 |
| GNLV5       | 2.25E-06   | -0.7141626 | 0.954 | 1     | 0.00450662 | 10 |
| LIME1       | 2.41E-06   | 0.35588775 | 0.431 | 0.286 | 0.00482472 | 10 |
| MIR22HG     | 4.59E-06   | -0.3426257 | 0.019 | 0.333 | 0.00918037 | 10 |
| IL324       | 8.12E-06   | 1.10805272 | 0.84  | 0.762 | 0.01623714 | 10 |
| GZMK2       | 1.04E-05   | -0.7044116 | 0.416 | 1     | 0.02088368 | 10 |
| LTB2        | 1.25E-05   | 1.06096676 | 0.847 | 1     | 0.02491116 | 10 |
| PRDX1       | 1.35E-05   | 0.32344516 | 0.427 | 0.333 | 0.02709024 | 10 |
| KLF10       | 1.95E-05   | -0.4033631 | 0.084 | 0.333 | 0.03897974 | 10 |
| TMSB10      | 1.96E-05   | 0.45206161 | 0.989 | 1     | 0.03925825 | 10 |
| MX12        | 2.20E-05   | -0.2611331 | 0.099 | 0.333 | 0.04398184 | 10 |
| RHOC        | 4.80E-05   | -0.3796688 | 0.267 | 0.905 | 0.09600518 | 10 |
| HSH2D       | 5.23E-05   | -0.3527558 | 0.439 | 1     | 0.10465325 | 10 |
| BHLHE40     | 5.55E-05   | -0.4464914 | 0.336 | 0.905 | 0.11091661 | 10 |
| PP1B2       | 5.64E-05   | -0.5053947 | 0.885 | 1     | 0.11270036 | 10 |
| ACTN11      | 6.51E-05   | 0.37100696 | 0.252 | 0.905 | 0.13025814 | 10 |
| ITGAX2      | 9.64E-05   | -0.4857589 | 0.248 | 0.857 | 0.19275994 | 10 |
| HLA-DMA1    | 9.70E-05   | -0.3636192 | 0.134 | 0.762 | 0.1939634  | 10 |
| KLRD12      | 9.76E-05   | -0.7429695 | 0.859 | 1     | 0.19515884 | 10 |
| FKBP11      | 0.00013149 | 0.32213077 | 0.37  | 0.381 | 0.26298036 | 10 |
| PNP         | 0.00014172 | 0.28697143 | 0.26  | 0.952 | 0.2834488  | 10 |
| SI00B2      | 0.00014483 | -1.0211423 | 0.011 | 0.381 | 0.2896584  | 10 |
| RPA3        | 0.00014563 | 0.25928424 | 0.26  | 0.952 | 0.29125748 | 10 |
| PMAIP13     | 0.00014883 | -0.7858205 | 0.168 | 0.333 | 0.29765229 | 10 |
| MYC1        | 0.00016695 | 0.28026445 | 0.267 | 0.952 | 0.33390624 | 10 |
| KLRG11      | 0.00021393 | 0.29589028 | 0.305 | 1     | 0.4278669  | 10 |
| IFITM22     | 0.00023948 | -0.4950625 | 0.992 | 1     | 0.47896261 | 10 |
| TPM4        | 0.00034075 | -0.2964816 | 0.359 | 1     | 0.6814995  | 10 |
| SI00A6      | 0.00038    | 1.01852924 | 0.775 | 0.81  | 0.76000461 | 10 |
| CMC1        | 0.00038959 | -0.7715354 | 0.653 | 0.905 | 0.77917246 | 10 |
| IFITM32     | 0.00056698 | -0.6326691 | 0.912 | 1     | 1          | 10 |
| SELL1       | 0.00057256 | -0.6052421 | 0.908 | 1     | 1          | 10 |
| AQP31       | 0.0007127  | 0.60959463 | 0.309 | 1     | 1          | 10 |
| GSN1        | 0.00071273 | -0.4638852 | 0.389 | 0.952 | 1          | 10 |
| CY5D21      | 0.00075322 | -0.7401181 | 0.073 | 0.381 | 1          | 10 |
| CD742       | 0.00077867 | -0.7136238 | 0.95  | 1     | 1          | 10 |
| KLRC11      | 0.0009361  | -0.6218595 | 0.511 | 1     | 1          | 10 |
| TYROBP      | 0.00103883 | -0.466279  | 0.966 | 1     | 1          | 10 |
| PLSCR1      | 0.00115781 | -0.2763787 | 0.103 | 0.381 | 1          | 10 |
| ACTB2       | 0.00123852 | 0.30858169 | 1     | 1     | 1          | 10 |
| GZMB1       | 0.00161749 | 0.73467739 | 0.592 | 0.571 | 1          | 10 |
| NDUFB6      | 0.00162094 | 0.41121067 | 0.424 | 0.476 | 1          | 10 |
| XCL22       | 0.00174796 | -0.7150103 | 0.63  | 1     | 1          | 10 |
| TIARP2      | 0.00174962 | -1.0463893 | 0.095 | 0.381 | 1          | 10 |
| XCL12       | 0.00177268 | -0.6008841 | 0.527 | 0.952 | 1          | 10 |



|           |            |            |       |       |   |    |
|-----------|------------|------------|-------|-------|---|----|
| STAT15    | 0.00188532 | 0.27475416 | 0.336 | 1     | 1 | 10 |
| CAPG      | 0.0019973  | -0.3458577 | 0.305 | 0.905 | 1 | 10 |
| FGFBP22   | 0.00227335 | 1.02941456 | 0.473 | 0.571 | 1 | 10 |
| SRGN      | 0.00250127 | -0.5206328 | 0.901 | 1     | 1 | 10 |
| RAMP1     | 0.00257517 | -0.3291577 | 0.183 | 0.762 | 1 | 10 |
| PDE4D2    | 0.00264988 | -0.2544894 | 0.134 | 0.381 | 1 | 10 |
| SPON22    | 0.00273707 | 0.70181211 | 0.466 | 0.524 | 1 | 10 |
| CDK6      | 0.00280142 | -0.4810683 | 0.126 | 0.381 | 1 | 10 |
| TRBV5-11  | 0.00295208 | 0.37669729 | 0.034 | 0.524 | 1 | 10 |
| NAAA1     | 0.00298691 | 0.26521896 | 0.344 | 1     | 1 | 10 |
| EGR13     | 0.00324128 | -0.4196225 | 0.107 | 0.667 | 1 | 10 |
| GADD45B2  | 0.00350057 | -0.3936463 | 0.531 | 1     | 1 | 10 |
| CFAP202   | 0.0035148  | -0.2893964 | 0.153 | 0.381 | 1 | 10 |
| LDHB2     | 0.0035664  | 0.52442497 | 0.863 | 0.952 | 1 | 10 |
| CTSW3     | 0.0036977  | -0.3440888 | 0.981 | 1     | 1 | 10 |
| PLPP5     | 0.00384342 | -0.261136  | 0.084 | 0.667 | 1 | 10 |
| ZMAT4     | 0.00384739 | -0.3354812 | 0.073 | 0.381 | 1 | 10 |
| S100A43   | 0.00388803 | 0.62593707 | 0.908 | 0.952 | 1 | 10 |
| KIR2DL11  | 0.00410167 | 0.29133759 | 0.145 | 0.667 | 1 | 10 |
| RNF130    | 0.00413335 | -0.3254577 | 0.168 | 0.381 | 1 | 10 |
| VIMI      | 0.00453675 | 0.64546703 | 0.882 | 0.905 | 1 | 10 |
| PASK1     | 0.00464089 | 0.33646428 | 0.172 | 0.571 | 1 | 10 |
| Z93241.12 | 0.00523132 | 0.25669529 | 0.332 | 0.952 | 1 | 10 |
| CD3G2     | 0.0053556  | 0.7899648  | 0.469 | 0.619 | 1 | 10 |
| ITGB12    | 0.00555713 | 0.28769687 | 0.523 | 0.524 | 1 | 10 |
| NBPF14    | 0.00949593 | -0.6295808 | 0.16  | 0.714 | 1 | 10 |
| IL2RB     | 0.00964453 | -0.6317946 | 0.74  | 1     | 1 | 10 |
| KLRF1     | 0.00991197 | -0.6933318 | 0.664 | 1     | 1 | 10 |
| NINJ1     | 0.01019671 | 0.28944506 | 0.29  | 0.476 | 1 | 10 |
| S1PR4     | 0.01037833 | 0.44991666 | 0.351 | 1     | 1 | 10 |
| ANXA2     | 0.01537336 | 0.39685905 | 0.363 | 0.524 | 1 | 10 |
| AHNAK2    | 0.01596659 | -0.6033106 | 0.683 | 0.952 | 1 | 10 |
| FAM30A    | 0.01601255 | -0.5630326 | 0.027 | 0.571 | 1 | 10 |
| TRDC      | 0.01721946 | -0.4205393 | 0.702 | 1     | 1 | 10 |
| CALR1     | 0.01888786 | 0.38073701 | 0.76  | 0.667 | 1 | 10 |
| NUCB21    | 0.01939003 | -0.2791653 | 0.55  | 1     | 1 | 10 |
| LAT1      | 0.02014733 | 0.74637768 | 0.592 | 0.81  | 1 | 10 |
| NCL1      | 0.02033344 | -0.4120698 | 0.87  | 1     | 1 | 10 |
| COTL1     | 0.02297204 | -0.4883769 | 0.687 | 0.952 | 1 | 10 |
| IL4R1     | 0.02308711 | -0.2595632 | 0.218 | 0.429 | 1 | 10 |
| CD37      | 0.02377727 | -0.3494475 | 0.905 | 1     | 1 | 10 |
| ANXA2R    | 0.02465908 | 0.37145283 | 0.351 | 0.952 | 1 | 10 |
| CCL44     | 0.02630684 | 0.5067997  | 0.351 | 0.952 | 1 | 10 |
| HLA-DPB12 | 0.02659481 | -0.2580673 | 0.321 | 0.429 | 1 | 10 |
| PLAC8     | 0.02848369 | -0.5417758 | 0.767 | 1     | 1 | 10 |
| DST       | 0.02919205 | -0.333376  | 0.038 | 0.571 | 1 | 10 |
| FCRL61    | 0.0344848  | 0.40579769 | 0.218 | 0.476 | 1 | 10 |
| CD631     | 0.03747749 | -0.4002437 | 0.615 | 1     | 1 | 10 |
| LGALS11   | 0.04184059 | 0.27846294 | 0.355 | 0.905 | 1 | 10 |
| VDAC3     | 0.04550186 | 0.29821936 | 0.382 | 1     | 1 | 10 |
| TSPO      | 0.04736323 | -0.3305163 | 0.683 | 1     | 1 | 10 |
| RANBP1    | 0.04843981 | 0.29796843 | 0.378 | 0.952 | 1 | 10 |
| IL7R4     | 0.04954753 | 0.3963183  | 0.84  | 0.952 | 1 | 10 |
| HIST1H1D1 | 0.05342792 | -0.8447685 | 0.5   | 0.857 | 1 | 10 |
| CALM2     | 0.05384675 | -0.4010838 | 0.718 | 1     | 1 | 10 |
| UBE2J1    | 0.06143438 | -0.3158435 | 0.302 | 0.762 | 1 | 10 |
| ESY11     | 0.06246177 | 0.33151165 | 0.389 | 1     | 1 | 10 |
| ANXA12    | 0.06824675 | 0.37127705 | 0.763 | 0.905 | 1 | 10 |
| TRBC21    | 0.06957884 | 0.32875416 | 0.828 | 0.952 | 1 | 10 |
| AIF11     | 0.07412936 | 0.27125611 | 0.183 | 0.714 | 1 | 10 |
| DNMT1     | 0.07748095 | 0.37243339 | 0.412 | 1     | 1 | 10 |
| GATA3     | 0.07765745 | -0.3090381 | 0.477 | 1     | 1 | 10 |
| SNRPD31   | 0.08054283 | 0.32053298 | 0.527 | 0.667 | 1 | 10 |
| ILK1      | 0.08987199 | 0.32122817 | 0.408 | 1     | 1 | 10 |
| CD72      | 0.09067814 | -0.4828554 | 0.989 | 1     | 1 | 10 |
| TRBC12    | 0.09642483 | 0.6246221  | 0.649 | 0.905 | 1 | 10 |
| TAGLN21   | 0.09649917 | -0.4519815 | 0.897 | 1     | 1 | 10 |
| IDH21     | 0.09656129 | 0.31056365 | 0.363 | 0.905 | 1 | 10 |
| NOSIP2    | 0.09843589 | 0.50773577 | 0.71  | 1     | 1 | 10 |
| HOPX1     | 0.10045307 | -0.4105361 | 0.897 | 1     | 1 | 10 |
| MYOM21    | 0.10634446 | 1.03211004 | 0.607 | 1     | 1 | 10 |
| PRMT1     | 0.10900142 | -0.2870387 | 0.492 | 1     | 1 | 10 |
| TPST2     | 0.11116457 | -0.5176331 | 0.634 | 1     | 1 | 10 |
| S100A11   | 0.11380678 | 0.52780209 | 0.615 | 0.952 | 1 | 10 |
| PTGDR1    | 0.12155812 | -0.2904532 | 0.584 | 1     | 1 | 10 |
| PIM2      | 0.13628694 | 0.30363179 | 0.405 | 0.952 | 1 | 10 |
| AT1C      | 0.14013176 | 0.30971944 | 0.29  | 0.571 | 1 | 10 |
| CCL54     | 0.14786917 | 0.61238462 | 0.718 | 1     | 1 | 10 |
| CLIC31    | 0.14972046 | 0.76877132 | 0.611 | 1     | 1 | 10 |
| YWHAQ1    | 0.15065155 | -0.3603237 | 0.66  | 1     | 1 | 10 |
| IFI44L7   | 0.15720347 | -0.8042014 | 0.057 | 0.571 | 1 | 10 |
| SNRPE     | 0.15731719 | 0.25438305 | 0.408 | 0.619 | 1 | 10 |
| CD3D4     | 0.17490983 | 0.10794869 | 0.542 | 0.905 | 1 | 10 |
| FBL       | 0.17860171 | -0.3396692 | 0.63  | 1     | 1 | 10 |
| NDUF3     | 0.18420364 | 0.49137968 | 0.42  | 1     | 1 | 10 |
| CPNE31    | 0.19218168 | 0.2889216  | 0.355 | 0.857 | 1 | 10 |
| HLA-DRB14 | 0.19334731 | -0.595184  | 0.187 | 0.476 | 1 | 10 |
| LDHA2     | 0.20767858 | -0.3040153 | 0.695 | 1     | 1 | 10 |
| MDHI      | 0.2106317  | 0.2667901  | 0.466 | 1     | 1 | 10 |
| TRBV7-23  | 0.21126963 | 0.3588054  | 0.031 | 0.19  | 1 | 10 |
| FCER1G1   | 0.21896418 | -0.6425458 | 0.92  | 1     | 1 | 10 |
| CARD16    | 0.22104274 | 0.30041886 | 0.489 | 0.714 | 1 | 10 |
| LRRN3     | 0.2286226  | 0.26158309 | 0.118 | 0.238 | 1 | 10 |
| 1-Sep     | 0.24147106 | 0.4104185  | 0.687 | 1     | 1 | 10 |
| TUBA1B1   | 0.24373312 | 0.3352573  | 0.687 | 1     | 1 | 10 |
| FCMR1     | 0.24993512 | 0.26416354 | 0.676 | 1     | 1 | 10 |
| SNX3      | 0.28121231 | -0.3211391 | 0.595 | 1     | 1 | 10 |
| KLRB13    | 0.28202011 | 0.28441975 | 0.74  | 1     | 1 | 10 |

|             |            |            |       |       |            |    |
|-------------|------------|------------|-------|-------|------------|----|
| CTSC1       | 0.29424515 | -0.2505893 | 0.679 | 1     | 1          | 10 |
| PA2G4       | 0.31701017 | -0.3013926 | 0.626 | 0.952 | 1          | 10 |
| CD5         | 0.3255898  | 0.38709302 | 0.252 | 0.667 | 1          | 10 |
| CASP1       | 0.34812509 | 0.26613567 | 0.29  | 0.762 | 1          | 10 |
| CD271       | 0.34937869 | 0.27667896 | 0.5   | 1     | 1          | 10 |
| ID21        | 0.3613308  | -0.2746759 | 0.645 | 1     | 1          | 10 |
| RGS2        | 0.37126036 | -0.456564  | 0.076 | 0.571 | 1          | 10 |
| ABRACL1     | 0.37813247 | 0.30303041 | 0.611 | 1     | 1          | 10 |
| CRIP21      | 0.38689134 | 0.2560013  | 0.13  | 0.571 | 1          | 10 |
| NFKBIZ5     | 0.4209535  | -0.2910517 | 0.206 | 0.619 | 1          | 10 |
| FOS4        | 0.42228888 | -0.6622892 | 0.916 | 0.952 | 1          | 10 |
| KLRC31      | 0.44553377 | -0.6323108 | 0.107 | 0.571 | 1          | 10 |
| SAT12       | 0.45106768 | -0.4486412 | 0.592 | 0.714 | 1          | 10 |
| I-Jun       | 0.45509986 | -0.6677522 | 0.931 | 0.952 | 1          | 10 |
| TTC38       | 0.4660443  | 0.36192096 | 0.435 | 0.905 | 1          | 10 |
| FCGR3A2     | 0.48200542 | 0.65908505 | 0.569 | 1     | 1          | 10 |
| CI2orf751   | 0.48324763 | 0.26344482 | 0.492 | 1     | 1          | 10 |
| NDUFAB1     | 0.53916345 | 0.31285433 | 0.489 | 1     | 1          | 10 |
| OSTC        | 0.58854477 | 0.27790534 | 0.504 | 1     | 1          | 10 |
| TIMP11      | 0.61441725 | 0.29709767 | 0.412 | 0.714 | 1          | 10 |
| EPRS1       | 0.72014678 | 0.30784781 | 0.366 | 0.714 | 1          | 10 |
| PYCARD      | 0.72479405 | 0.25225412 | 0.366 | 0.762 | 1          | 10 |
| NUDT1       | 0.74401076 | -0.2684579 | 0.206 | 0.619 | 1          | 10 |
| CSTB1       | 0.76491372 | 0.28174797 | 0.618 | 1     | 1          | 10 |
| NEAT12      | 0.78212391 | -0.3542494 | 0.615 | 0.667 | 1          | 10 |
| CCR71       | 0.79302605 | 0.42388787 | 0.431 | 0.905 | 1          | 10 |
| ZFH3        | 0.82802517 | -0.3122369 | 0.038 | 0.524 | 1          | 10 |
| CIQBP       | 0.85896135 | 0.44111074 | 0.534 | 1     | 1          | 10 |
| LEF11       | 0.86503754 | 0.31630874 | 0.466 | 0.81  | 1          | 10 |
| CCT2        | 0.87667502 | 0.49685349 | 0.466 | 0.905 | 1          | 10 |
| SLCIA5      | 0.87781345 | -0.7993481 | 0.061 | 0.524 | 1          | 10 |
| CX3CR11     | 0.87838819 | 0.49591577 | 0.344 | 0.714 | 1          | 10 |
| ALOX5AP     | 0.91852983 | 0.55696917 | 0.458 | 0.905 | 1          | 10 |
| AL138963.36 | 0.93284781 | 0.63977883 | 0.58  | 1     | 1          | 10 |
| MTRNR2L12   | 0.9348447  | 0.25768289 | 1     | 1     | 1          | 10 |
| RPS27L      | 0.93666852 | 0.27830337 | 0.534 | 1     | 1          | 10 |
| MYDGF       | 0.9424017  | -0.2830432 | 0.382 | 0.667 | 1          | 10 |
| HSPA8       | 0.96794676 | -0.2643396 | 0.962 | 1     | 1          | 10 |
| CCL34       | 0.97239013 | 0.2745403  | 0.122 | 0.571 | 1          | 10 |
| IGKV3-111   | 6.39E-31   | 0.85043566 | 0.011 | 0.75  | 1.28E-27   | 11 |
| RNASE1      | 1.12E-25   | -0.3945227 | 0.004 | 0.125 | 2.24E-22   | 11 |
| TUBB1       | 5.77E-22   | -0.3203673 | 0     | 0.125 | 1.15E-18   | 11 |
| IRF4        | 1.63E-21   | -0.3709316 | 0.036 | 0.875 | 3.25E-18   | 11 |
| TSC22D1     | 4.85E-20   | -0.2560171 | 0.022 | 0.875 | 9.71E-17   | 11 |
| IGKV3-201   | 3.55E-19   | 0.40035342 | 0.018 | 0.625 | 7.10E-16   | 11 |
| TRBV5-61    | 3.55E-19   | 0.30154316 | 0.018 | 0.625 | 7.10E-16   | 11 |
| IGLV2-141   | 3.71E-19   | 0.69698903 | 0.029 | 0.75  | 7.43E-16   | 11 |
| RHOC1       | 2.48E-18   | -0.5862635 | 0.066 | 1     | 4.97E-15   | 11 |
| TPM1        | 2.08E-16   | -0.4502421 | 0.073 | 1     | 4.17E-13   | 11 |
| TNF4        | 7.41E-16   | 0.27292044 | 0.047 | 0.125 | 1.48E-12   | 11 |
| CLU1        | 2.07E-15   | 0.34510818 | 0.004 | 0.25  | 4.14E-12   | 11 |
| TRBV7-61    | 7.87E-15   | -0.4991045 | 0.044 | 0.75  | 1.57E-11   | 11 |
| IGHV3-231   | 2.57E-13   | 0.29965654 | 0.033 | 0.625 | 5.14E-10   | 11 |
| TRBV92      | 8.64E-13   | 0.28653956 | 0.051 | 0.75  | 1.73E-09   | 11 |
| ASGR2       | 9.21E-13   | 0.41870401 | 0.117 | 0     | 1.84E-09   | 11 |
| BANK1       | 1.60E-12   | -0.2908454 | 0.095 | 1     | 3.21E-09   | 11 |
| UBE2S       | 3.76E-12   | -0.3409591 | 0.099 | 1     | 7.53E-09   | 11 |
| GZMK3       | 5.13E-12   | 0.32384217 | 0.095 | 1     | 1.03E-08   | 11 |
| ZSCAN22     | 2.55E-11   | -0.428441  | 0.004 | 0.25  | 5.10E-08   | 11 |
| CCDC50      | 1.43E-10   | -0.2866306 | 0.117 | 1     | 2.86E-07   | 11 |
| RACGAP1     | 3.33E-10   | -0.2550026 | 0.026 | 0.25  | 6.66E-07   | 11 |
| CALHM6      | 1.00E-09   | 0.40754466 | 0.12  | 0.125 | 2.01E-06   | 11 |
| SIGLEC1     | 1.18E-09   | -0.9171724 | 0.033 | 0.5   | 2.36E-06   | 11 |
| MANF        | 2.25E-09   | -0.3424679 | 0.131 | 1     | 4.50E-06   | 11 |
| ITGB5       | 4.28E-09   | -0.3352093 | 0     | 0.375 | 8.56E-06   | 11 |
| HES11       | 4.28E-09   | -0.4000908 | 0     | 0.125 | 8.56E-06   | 11 |
| MGST1       | 5.67E-09   | 0.82215407 | 0.219 | 0     | 1.13E-05   | 11 |
| KPNA2       | 8.56E-09   | -0.2875236 | 0.08  | 0.875 | 1.71E-05   | 11 |
| MIR22HG1    | 1.21E-08   | 0.50233406 | 0.153 | 0.125 | 2.42E-05   | 11 |
| TRBV282     | 1.22E-08   | 0.27725452 | 0.036 | 0.5   | 2.44E-05   | 11 |
| TRDC1       | 2.34E-08   | -0.329654  | 0.088 | 0.75  | 4.69E-05   | 11 |
| BASP1       | 2.42E-08   | 0.29801967 | 0.102 | 0.125 | 4.84E-05   | 11 |
| MX13        | 3.50E-08   | 0.25926978 | 0.164 | 0.125 | 7.00E-05   | 11 |
| TRBV20-14   | 3.57E-08   | 0.71522857 | 0.084 | 0.75  | 7.14E-05   | 11 |
| TXNDC17     | 4.97E-08   | 0.88085515 | 0.38  | 0     | 9.94E-05   | 11 |
| SMIM3       | 1.09E-07   | -0.4101179 | 0.051 | 0.25  | 0.00021861 | 11 |
| ID31        | 1.64E-07   | 0.25397772 | 0.091 | 0.75  | 0.00032745 | 11 |
| IFI61       | 4.65E-07   | 0.29131893 | 0.208 | 0.125 | 0.00092995 | 11 |
| COMTD1      | 8.79E-07   | -0.4093696 | 0.109 | 0.875 | 0.00175718 | 11 |
| CD300LF     | 1.06E-06   | -0.5376361 | 0.153 | 0.875 | 0.00212816 | 11 |
| CMC11       | 1.17E-06   | -0.3525291 | 0.172 | 1     | 0.00233222 | 11 |
| MCM7        | 1.87E-06   | -0.2973896 | 0.113 | 0.875 | 0.00373369 | 11 |
| HPGD        | 3.13E-06   | -0.2866252 | 0.033 | 0.25  | 0.00625231 | 11 |
| TBX21       | 4.03E-06   | -0.5873357 | 0.088 | 0.625 | 0.00805978 | 11 |
| HSPB11      | 4.71E-06   | -0.3147661 | 0.193 | 1     | 0.00942696 | 11 |
| TRBV7-24    | 8.11E-06   | 0.75581701 | 0.058 | 0.5   | 0.0162125  | 11 |
| LMNA3       | 9.00E-06   | -0.2654174 | 0.091 | 0.25  | 0.01799303 | 11 |
| CD8A1       | 1.03E-05   | 0.45773287 | 0.179 | 1     | 0.02059107 | 11 |
| CDCA7L      | 1.12E-05   | -0.2994656 | 0.058 | 0.625 | 0.02234582 | 11 |
| EPST112     | 1.27E-05   | -0.5498558 | 0.102 | 0.25  | 0.02535666 | 11 |
| SAMD31      | 1.37E-05   | -0.3004259 | 0.172 | 0.875 | 0.02732463 | 11 |
| CD692       | 1.59E-05   | -1.4003826 | 0.405 | 1     | 0.03176092 | 11 |
| MCM31       | 1.82E-05   | -0.2720655 | 0.128 | 0.875 | 0.03642301 | 11 |
| GBPS2       | 1.87E-05   | -0.2868251 | 0.201 | 1     | 0.03741567 | 11 |
| EPHB6       | 2.21E-05   | -0.3053993 | 0.095 | 0.75  | 0.04410978 | 11 |
| MS4A1       | 2.29E-05   | 0.47652964 | 0.157 | 0.875 | 0.04572787 | 11 |
| RPS4Y11     | 2.88E-05   | -0.6450545 | 0     | 0.625 | 0.05765204 | 11 |
| SWAP70      | 3.02E-05   | 0.42454222 | 0.153 | 0.25  | 0.0603478  | 11 |

|             |            |            |       |       |            |    |
|-------------|------------|------------|-------|-------|------------|----|
| CISD1       | 3.04E-05   | -0.3560686 | 0.142 | 0.875 | 0.06073113 | 11 |
| GPR35       | 4.22E-05   | -0.2550463 | 0.055 | 0.25  | 0.0843562  | 11 |
| IL2RB1      | 4.45E-05   | -0.4628314 | 0.106 | 0.625 | 0.08896867 | 11 |
| P2RY13      | 4.63E-05   | -0.3056548 | 0.106 | 0.75  | 0.09261015 | 11 |
| HPRT1       | 5.18E-05   | 0.3252523  | 0.179 | 0.25  | 0.10366006 | 11 |
| PIK3AP1     | 6.58E-05   | 0.41261727 | 0.193 | 0.25  | 0.13165321 | 11 |
| MT1X        | 7.62E-05   | 0.30920196 | 0.186 | 0.25  | 0.15243213 | 11 |
| PTTG1       | 8.31E-05   | -0.3963646 | 0.062 | 0.25  | 0.16627246 | 11 |
| CD79A1      | 0.00010376 | 0.82906986 | 0.172 | 0.875 | 0.20751732 | 11 |
| 1-Mar       | 0.00010463 | -0.2995027 | 0.263 | 1     | 0.20925331 | 11 |
| CD40        | 0.00011396 | 0.260554   | 0.102 | 0.75  | 0.22792388 | 11 |
| GLIPR11     | 0.00012108 | 0.99675373 | 0.504 | 0.25  | 0.24216942 | 11 |
| SELENOS     | 0.00012777 | 0.442829   | 0.252 | 0.25  | 0.25553284 | 11 |
| RPNI        | 0.00024006 | 0.67110211 | 0.42  | 0.25  | 0.48012581 | 11 |
| ASGR1       | 0.00037439 | -0.7390604 | 0.365 | 1     | 0.74878183 | 11 |
| DDIT42      | 0.0005501  | 0.35684768 | 0.307 | 0.25  | 1          | 11 |
| PSMD8       | 0.00067641 | 0.37588255 | 0.394 | 0.25  | 1          | 11 |
| PRF11       | 0.00067874 | -0.2843292 | 0.175 | 0.75  | 1          | 11 |
| CD40LG      | 0.00068164 | 0.27272536 | 0.124 | 0.625 | 1          | 11 |
| AREG2       | 0.00084935 | -0.5328843 | 0.022 | 0.375 | 1          | 11 |
| PYGL        | 0.00086586 | -0.4188169 | 0.259 | 0.875 | 1          | 11 |
| NELL22      | 0.00111709 | -0.2587362 | 0.142 | 0.625 | 1          | 11 |
| RALGPS2     | 0.00117276 | 0.33724054 | 0.128 | 0.75  | 1          | 11 |
| CEBPB       | 0.00121382 | 1.1245204  | 0.599 | 0.375 | 1          | 11 |
| SNX22       | 0.00128643 | -0.5335161 | 0.026 | 0.375 | 1          | 11 |
| HIST1H1D2   | 0.00157458 | -0.5524797 | 0.405 | 1     | 1          | 11 |
| CTSW4       | 0.00227138 | 0.47178674 | 0.259 | 1     | 1          | 11 |
| CREB5       | 0.00260814 | -0.3727026 | 0.172 | 0.75  | 1          | 11 |
| TREML1      | 0.00283788 | -0.3236791 | 0.004 | 0.125 | 1          | 11 |
| CST73       | 0.00296177 | -0.2680564 | 0.208 | 0.875 | 1          | 11 |
| AC103591.36 | 0.00314496 | -0.7394571 | 0.036 | 0.375 | 1          | 11 |
| ETFA        | 0.00361175 | -0.3297034 | 0.237 | 0.875 | 1          | 11 |
| TRAV13-12   | 0.00380276 | 0.27911133 | 0.069 | 0.375 | 1          | 11 |
| ACTG12      | 0.00416367 | 0.65687864 | 0.967 | 1     | 1          | 11 |
| EPRS2       | 0.00460742 | 0.26118876 | 0.266 | 1     | 1          | 11 |
| OSTC1       | 0.00505304 | 0.4139611  | 0.35  | 0.375 | 1          | 11 |
| GZMB2       | 0.00530749 | 0.4488492  | 0.109 | 0.625 | 1          | 11 |
| HLA-DQA11   | 0.00549148 | 0.36808901 | 0.277 | 1     | 1          | 11 |
| LINC009261  | 0.00550309 | 0.29672762 | 0.113 | 0.5   | 1          | 11 |
| ITGB13      | 0.00657206 | 0.60853661 | 0.365 | 0.375 | 1          | 11 |
| SULT1A1     | 0.00692129 | 0.5199017  | 0.321 | 0.375 | 1          | 11 |
| IDH22       | 0.00814205 | 0.31417453 | 0.303 | 0.375 | 1          | 11 |
| GGCT        | 0.0081431  | 0.28368699 | 0.142 | 0.375 | 1          | 11 |
| IGHV5-511   | 0.00826123 | 0.39248258 | 0.011 | 0.125 | 1          | 11 |
| ERLEC11     | 0.00837686 | 0.37960566 | 0.179 | 0.375 | 1          | 11 |
| LYL1        | 0.00838986 | 0.33255857 | 0.175 | 0.375 | 1          | 11 |
| ICAM1       | 0.00864583 | 0.28554399 | 0.142 | 0.375 | 1          | 11 |
| BCL2A1      | 0.00883163 | 0.59927875 | 0.27  | 0.375 | 1          | 11 |
| PRDM12      | 0.00889868 | -0.4094349 | 0.066 | 0.375 | 1          | 11 |
| VPREB3      | 0.00980667 | 0.25127556 | 0.08  | 0.375 | 1          | 11 |
| RXRA        | 0.00986803 | 0.38598025 | 0.255 | 0.375 | 1          | 11 |
| LDHA3       | 0.00988644 | 0.74888579 | 0.562 | 0.5   | 1          | 11 |
| DMTN        | 0.01128513 | -0.3439495 | 0.011 | 0.125 | 1          | 11 |
| ACSL1       | 0.01149879 | -0.3705825 | 0.08  | 0.375 | 1          | 11 |
| SLC31A2     | 0.01218025 | -0.254196  | 0.157 | 0.75  | 1          | 11 |
| MZT1        | 0.01239631 | -0.5421553 | 0.164 | 0.75  | 1          | 11 |
| IGLV1-401   | 0.01271544 | -1.0776409 | 0.007 | 0.25  | 1          | 11 |
| HVCN1       | 0.0137875  | 0.33978598 | 0.212 | 0.875 | 1          | 11 |
| SLC25A37    | 0.01782355 | -0.5923633 | 0.19  | 0.75  | 1          | 11 |
| ADGRE2      | 0.01867424 | -0.2674587 | 0.095 | 0.625 | 1          | 11 |
| INSIG1      | 0.01953729 | -0.2865802 | 0.106 | 0.375 | 1          | 11 |
| CALR2       | 0.0212273  | 0.54499255 | 0.544 | 0.5   | 1          | 11 |
| AQP32       | 0.02226082 | 0.60925846 | 0.303 | 1     | 1          | 11 |
| IGHV3-531   | 0.02260792 | 0.27357338 | 0.015 | 0.125 | 1          | 11 |
| SELL2       | 0.02333382 | 0.77004389 | 0.704 | 0.625 | 1          | 11 |
| FKBP21      | 0.02420394 | -0.6082262 | 0.328 | 0.375 | 1          | 11 |
| SPN         | 0.0253748  | 0.31295704 | 0.307 | 1     | 1          | 11 |
| HIST1H1C1   | 0.02562616 | -0.3590597 | 0.343 | 0.875 | 1          | 11 |
| RPA31       | 0.02582299 | -0.5212772 | 0.201 | 0.75  | 1          | 11 |
| MT-ND4L     | 0.02619526 | 0.4537651  | 0.989 | 1     | 1          | 11 |
| TRAC1       | 0.02952135 | 0.42732932 | 0.318 | 1     | 1          | 11 |
| CDKN1A      | 0.03211849 | -0.5437733 | 0.226 | 0.75  | 1          | 11 |
| ILIR2       | 0.03227604 | -0.3886542 | 0.004 | 0.375 | 1          | 11 |
| HYOU1       | 0.03404984 | -0.2836414 | 0.113 | 0.625 | 1          | 11 |
| ACTB3       | 0.03419675 | 0.3271438  | 1     | 1     | 1          | 11 |
| HIST1H4C1   | 0.03480828 | -0.4519795 | 0.544 | 1     | 1          | 11 |
| NRGN        | 0.03484796 | 0.32673774 | 0.255 | 0.375 | 1          | 11 |
| CYB561A3    | 0.03631203 | 0.40494779 | 0.237 | 0.875 | 1          | 11 |
| TLR2        | 0.03665169 | 0.31963991 | 0.193 | 0.75  | 1          | 11 |
| SH3BGR1.31  | 0.03689199 | 0.41747355 | 0.993 | 1     | 1          | 11 |
| HOPX2       | 0.03801075 | -0.3511885 | 0.164 | 0.75  | 1          | 11 |
| LAT3        | 0.0381172  | -0.3731639 | 0.405 | 1     | 1          | 11 |
| COTL11      | 0.03890845 | 0.41954834 | 0.942 | 1     | 1          | 11 |
| RASSF4      | 0.0433968  | -0.3417441 | 0.332 | 0.875 | 1          | 11 |
| IGKV1-51    | 0.04486902 | 0.66616515 | 0.018 | 0.125 | 1          | 11 |
| GAPDH       | 0.05058187 | 0.36527111 | 0.996 | 1     | 1          | 11 |
| PRMT11      | 0.05333942 | 0.37241116 | 0.332 | 1     | 1          | 11 |
| HSPD1       | 0.05381714 | -0.3814782 | 0.369 | 0.875 | 1          | 11 |
| AHNAK3      | 0.05514013 | 0.78005836 | 0.803 | 0.875 | 1          | 11 |
| ACTN12      | 0.05676664 | 0.60600117 | 0.339 | 0.5   | 1          | 11 |
| CD1631      | 0.05760977 | -0.3747766 | 0.208 | 0.75  | 1          | 11 |
| LRRK2       | 0.06381693 | -0.2604184 | 0.193 | 0.75  | 1          | 11 |
| PPM1G1      | 0.06432803 | -0.3882533 | 0.387 | 0.875 | 1          | 11 |
| CACYBP      | 0.06493952 | 0.53089986 | 0.325 | 0.5   | 1          | 11 |
| GAS6        | 0.06633599 | -0.5060294 | 0.018 | 0.375 | 1          | 11 |
| NDUFB31     | 0.06972709 | 0.4127008  | 0.376 | 0.5   | 1          | 11 |
| CTSS        | 0.07028553 | 0.47578656 | 0.938 | 0.75  | 1          | 11 |
| PYCARD1     | 0.0721109  | -0.3285823 | 0.766 | 1     | 1          | 11 |

|             |            |            |       |       |   |    |
|-------------|------------|------------|-------|-------|---|----|
| IGHV3-211   | 0.07394262 | 0.37085932 | 0.022 | 0.125 | 1 | 11 |
| CD632       | 0.08059289 | -0.8944667 | 0.449 | 0.875 | 1 | 11 |
| CPPE1       | 0.08064509 | 0.37552367 | 0.361 | 0.5   | 1 | 11 |
| TAGLN22     | 0.08253729 | 0.61360985 | 0.81  | 0.875 | 1 | 11 |
| CFP         | 0.084724   | 0.3454955  | 0.547 | 0.5   | 1 | 11 |
| ARHGAP24    | 0.08752073 | -0.3335078 | 0.153 | 0.625 | 1 | 11 |
| S100A101    | 0.09080509 | 0.4110862  | 0.96  | 1     | 1 | 11 |
| SIRPG2      | 0.09136049 | 0.3519097  | 0.172 | 0.75  | 1 | 11 |
| PGD         | 0.09370157 | -0.3397999 | 0.522 | 0.875 | 1 | 11 |
| SUB11       | 0.09384386 | 0.53214383 | 0.686 | 0.75  | 1 | 11 |
| KLF101      | 0.09743759 | 0.33192605 | 0.405 | 0.5   | 1 | 11 |
| NAIP        | 0.09870537 | -0.250486  | 0.361 | 0.875 | 1 | 11 |
| H2AFY2      | 0.09979721 | 0.43815298 | 0.562 | 0.625 | 1 | 11 |
| MRPL131     | 0.10133794 | 0.26246693 | 0.175 | 0.75  | 1 | 11 |
| ATPSF1B1    | 0.10191612 | 0.35569402 | 0.635 | 0.625 | 1 | 11 |
| CD93        | 0.10603835 | -0.2652138 | 0.27  | 0.75  | 1 | 11 |
| PSMB8       | 0.1066642  | -0.4485576 | 0.584 | 0.875 | 1 | 11 |
| NFKB1Z6     | 0.108472   | -0.4351767 | 0.38  | 0.75  | 1 | 11 |
| MT-ATP81    | 0.10852264 | -0.3275045 | 0.664 | 1     | 1 | 11 |
| CYP1B1      | 0.10883322 | 0.27214443 | 0.124 | 0.625 | 1 | 11 |
| SDHC1       | 0.11039636 | 0.34911216 | 0.318 | 0.5   | 1 | 11 |
| ENO11       | 0.11107256 | 0.44861189 | 0.745 | 0.75  | 1 | 11 |
| P2RX1       | 0.1110802  | -0.5015076 | 0.088 | 0.625 | 1 | 11 |
| CPVL        | 0.11291892 | 0.39548724 | 0.449 | 0.5   | 1 | 11 |
| TRGV92      | 0.11707603 | -1.0775623 | 0.029 | 0.125 | 1 | 11 |
| TLN11       | 0.11725165 | 0.40711361 | 0.588 | 0.625 | 1 | 11 |
| VIM2        | 0.11791732 | 0.33427452 | 0.978 | 1     | 1 | 11 |
| CORO1A1     | 0.11990021 | 0.29721769 | 0.916 | 1     | 1 | 11 |
| CALM21      | 0.12311942 | 0.26893265 | 0.734 | 0.625 | 1 | 11 |
| MTRNR2L121  | 0.12424537 | 0.48862441 | 0.971 | 1     | 1 | 11 |
| FERM13      | 0.12473388 | 0.2546196  | 0.478 | 0.5   | 1 | 11 |
| CFD         | 0.1249921  | -0.3734404 | 0.664 | 0.875 | 1 | 11 |
| PLAC81      | 0.1252967  | -0.5840969 | 0.387 | 0.5   | 1 | 11 |
| ATP2B1-AS13 | 0.12634956 | 0.71429619 | 0.591 | 0.75  | 1 | 11 |
| CTSD        | 0.12701701 | 0.4907173  | 0.544 | 0.625 | 1 | 11 |
| GZMA3       | 0.13374383 | 0.54450119 | 0.19  | 0.5   | 1 | 11 |
| HIFX3       | 0.13534471 | 0.62968554 | 0.555 | 0.625 | 1 | 11 |
| FGFBP23     | 0.13730169 | 0.25003672 | 0.08  | 0.25  | 1 | 11 |
| MYADM2      | 0.13853092 | -0.3718748 | 0.46  | 0.875 | 1 | 11 |
| MT2A6       | 0.13887979 | -0.5973574 | 0.507 | 0.5   | 1 | 11 |
| DUT         | 0.14192549 | -0.2751331 | 0.511 | 0.875 | 1 | 11 |
| RBP7        | 0.14893916 | -0.2624597 | 0.427 | 0.875 | 1 | 11 |
| SOX42       | 0.15247774 | 0.44473162 | 0.237 | 0.5   | 1 | 11 |
| ATPSF1A     | 0.15481385 | 0.55627233 | 0.624 | 0.875 | 1 | 11 |
| MPP1        | 0.15570519 | 0.36947906 | 0.223 | 0.5   | 1 | 11 |
| NCF2        | 0.16317545 | 0.6366318  | 0.624 | 0.75  | 1 | 11 |
| C19orf38    | 0.16379916 | 0.38677679 | 0.412 | 0.5   | 1 | 11 |
| CSTA        | 0.16616037 | 0.4784782  | 0.682 | 0.75  | 1 | 11 |
| KLRD13      | 0.16732061 | -0.7574814 | 0.099 | 0.25  | 1 | 11 |
| FOSB3       | 0.16968453 | 0.32149487 | 0.704 | 0.625 | 1 | 11 |
| IFITM33     | 0.17135846 | -0.2834596 | 0.781 | 0.625 | 1 | 11 |
| CSE3R       | 0.17215042 | -0.5495855 | 0.504 | 0.875 | 1 | 11 |
| GZMM1       | 0.17553017 | 0.55712682 | 0.376 | 1     | 1 | 11 |
| IFNGR2      | 0.17893528 | 0.3317857  | 0.409 | 0.5   | 1 | 11 |
| AHR         | 0.18535293 | -0.7674429 | 0.19  | 0.625 | 1 | 11 |
| LAG31       | 0.18666269 | -0.2558459 | 0.033 | 0.25  | 1 | 11 |
| TNFRSF13C   | 0.19519482 | -0.256253  | 0.033 | 0.25  | 1 | 11 |
| VCL         | 0.19648921 | 0.38887341 | 0.193 | 0.5   | 1 | 11 |
| TRAV12-1    | 0.19956661 | -0.2688155 | 0.033 | 0.25  | 1 | 11 |
| PRDX11      | 0.20145194 | 0.72116958 | 0.522 | 0.75  | 1 | 11 |
| DUSP6       | 0.20156853 | -0.8200625 | 0.347 | 0.75  | 1 | 11 |
| SEC61B      | 0.20367089 | -0.3141726 | 0.734 | 0.75  | 1 | 11 |
| HLA-DPB13   | 0.20367096 | 0.65995511 | 0.734 | 0.875 | 1 | 11 |
| HSP90AB11   | 0.2117828  | -0.5284457 | 0.854 | 1     | 1 | 11 |
| SNAP23      | 0.21770923 | 0.43950419 | 0.307 | 0.875 | 1 | 11 |
| NPC2        | 0.21849151 | 0.38948294 | 0.679 | 0.75  | 1 | 11 |
| CD361       | 0.22003587 | 0.58050916 | 0.5   | 0.625 | 1 | 11 |
| NKG73       | 0.22255346 | -0.2862194 | 0.266 | 0.5   | 1 | 11 |
| FPR1        | 0.2263139  | 0.27925243 | 0.354 | 0.5   | 1 | 11 |
| HSP90B13    | 0.22791383 | -0.399432  | 0.668 | 0.875 | 1 | 11 |
| YWHAQ2      | 0.22953566 | -0.2610077 | 0.42  | 0.875 | 1 | 11 |
| LTB3        | 0.24042292 | 0.51138836 | 0.85  | 1     | 1 | 11 |
| CANX        | 0.24247566 | 0.36830358 | 0.449 | 0.625 | 1 | 11 |
| DUSP11      | 0.2428047  | 0.31724453 | 0.92  | 0.75  | 1 | 11 |
| PSME21      | 0.24303425 | 0.3039986  | 0.712 | 0.75  | 1 | 11 |
| CSTB2       | 0.2432327  | 0.51836573 | 0.715 | 1     | 1 | 11 |
| LGALS12     | 0.24807417 | 0.28404802 | 0.901 | 1     | 1 | 11 |
| BTK         | 0.25032061 | 0.26453132 | 0.157 | 0.625 | 1 | 11 |
| STAB1       | 0.25106542 | -0.9656747 | 0.172 | 0.625 | 1 | 11 |
| TMEM1562    | 0.25616678 | -0.4184104 | 0.044 | 0.375 | 1 | 11 |
| HLA-DQB11   | 0.25670188 | 0.46383794 | 0.434 | 1     | 1 | 11 |
| IFI30       | 0.25895885 | 0.53115046 | 0.504 | 0.625 | 1 | 11 |
| IL325       | 0.25899107 | 0.66752858 | 0.737 | 1     | 1 | 11 |
| LDHB3       | 0.25953391 | 0.33917729 | 0.807 | 1     | 1 | 11 |
| SYK1        | 0.26281082 | 0.2820445  | 0.434 | 0.625 | 1 | 11 |
| RAB32       | 0.265006   | 0.31588025 | 0.347 | 0.5   | 1 | 11 |
| PA2G41      | 0.26826545 | 0.56620323 | 0.496 | 0.75  | 1 | 11 |
| CCT7        | 0.27690502 | 0.40805808 | 0.416 | 1     | 1 | 11 |
| PDCD5       | 0.27923503 | 0.52871859 | 0.401 | 1     | 1 | 11 |
| AP2S1       | 0.28014629 | 0.37228874 | 0.737 | 1     | 1 | 11 |
| HP          | 0.28393292 | -0.2609814 | 0.036 | 0.5   | 1 | 11 |
| SGK12       | 0.28524317 | -0.6959222 | 0.303 | 0.625 | 1 | 11 |
| UQCC2       | 0.2899689  | 0.31999928 | 0.223 | 0.75  | 1 | 11 |
| SERPINA1    | 0.29808174 | 0.43889357 | 0.788 | 0.875 | 1 | 11 |
| FGR1        | 0.30476537 | 0.36660164 | 0.602 | 0.75  | 1 | 11 |
| CYTOR       | 0.30781981 | -0.3689939 | 0.142 | 0.625 | 1 | 11 |
| HLA-DRB15   | 0.31771926 | -0.3334231 | 0.814 | 0.875 | 1 | 11 |
| TRAV8-41    | 0.31796933 | 0.38406086 | 0.044 | 0.125 | 1 | 11 |

|             |            |            |       |       |   |    |
|-------------|------------|------------|-------|-------|---|----|
| PPICA       | 0.32031095 | 0.55523785 | 0.679 | 1     | 1 | 11 |
| RAB31       | 0.3209788  | 0.34407252 | 0.31  | 0.5   | 1 | 11 |
| CTSC2       | 0.32739181 | -0.5484222 | 0.445 | 0.625 | 1 | 11 |
| STXBP2      | 0.3315763  | 0.38904279 | 0.719 | 0.75  | 1 | 11 |
| ADGRG12     | 0.33355958 | -0.3009988 | 0.051 | 0.125 | 1 | 11 |
| SAT13       | 0.34986869 | 0.31991293 | 0.92  | 1     | 1 | 11 |
| TRBV6-1     | 0.35079923 | 0.33173232 | 0.044 | 0.25  | 1 | 11 |
| TIMM10      | 0.352076   | 0.27017161 | 0.245 | 0.75  | 1 | 11 |
| Z93241.13   | 0.36168293 | 0.39210415 | 0.416 | 1     | 1 | 11 |
| DYNLL1      | 0.36397357 | 0.37225905 | 0.566 | 0.75  | 1 | 11 |
| CTS5        | 0.36408732 | 0.2881927  | 0.365 | 0.875 | 1 | 11 |
| AL138963.37 | 0.3790285  | 1.18363138 | 0.635 | 1     | 1 | 11 |
| Clorf162    | 0.379592   | -0.4306498 | 0.672 | 1     | 1 | 11 |
| CTSA        | 0.38193375 | -0.2690353 | 0.347 | 0.5   | 1 | 11 |
| EMILIN2     | 0.39289334 | -0.2997232 | 0.321 | 0.625 | 1 | 11 |
| RAB11FIP11  | 0.39319642 | -0.2608951 | 0.339 | 0.75  | 1 | 11 |
| TBXAS1      | 0.39405128 | 0.33699965 | 0.365 | 0.625 | 1 | 11 |
| MIF1        | 0.40522303 | 0.25696515 | 0.796 | 0.875 | 1 | 11 |
| 11-Sep      | 0.40970899 | 0.52320804 | 0.438 | 1     | 1 | 11 |
| NBPF141     | 0.41798489 | -0.9290237 | 0.321 | 0.5   | 1 | 11 |
| HIST1HIE    | 0.44788707 | 0.48862535 | 0.704 | 0.875 | 1 | 11 |
| TCL1A       | 0.44908186 | 0.33014777 | 0.055 | 0.125 | 1 | 11 |
| SLC9A3R12   | 0.45757828 | 0.34824627 | 0.478 | 1     | 1 | 11 |
| CLEC12A     | 0.46588528 | 0.34116777 | 0.325 | 0.75  | 1 | 11 |
| SUPT16H     | 0.46888726 | -0.2726557 | 0.208 | 0.5   | 1 | 11 |
| ITGB71      | 0.47686176 | 0.39103756 | 0.255 | 0.75  | 1 | 11 |
| PLEK1       | 0.48454096 | 0.3315668  | 0.536 | 0.75  | 1 | 11 |
| DNMT11      | 0.49096917 | -0.337264  | 0.332 | 0.75  | 1 | 11 |
| MT-ND61     | 0.49458799 | 1.02142179 | 0.569 | 1     | 1 | 11 |
| CRTAPI      | 0.50055994 | 0.32260928 | 0.547 | 0.75  | 1 | 11 |
| LTA4H       | 0.50392923 | 0.68902917 | 0.602 | 1     | 1 | 11 |
| MTHFD2      | 0.50504819 | -0.3139688 | 0.139 | 0.5   | 1 | 11 |
| CD51        | 0.5068423  | 0.40027575 | 0.201 | 0.5   | 1 | 11 |
| SSR4        | 0.51598762 | 0.27680206 | 0.741 | 1     | 1 | 11 |
| MNDA2       | 0.52515494 | -0.2875722 | 0.755 | 1     | 1 | 11 |
| HLA-DQA2    | 0.5320243  | 0.27550748 | 0.496 | 1     | 1 | 11 |
| TRBV3-12    | 0.54262496 | 0.33608906 | 0.051 | 0.125 | 1 | 11 |
| BHLHE401    | 0.54653726 | -0.3347774 | 0.175 | 0.5   | 1 | 11 |
| NUDT11      | 0.54941037 | 0.46075951 | 0.281 | 0.625 | 1 | 11 |
| NDUFAB11    | 0.55075398 | 0.36331665 | 0.478 | 1     | 1 | 11 |
| RGS21       | 0.56062532 | 0.27243667 | 0.522 | 1     | 1 | 11 |
| VDAC31      | 0.5660814  | 0.4426837  | 0.277 | 0.625 | 1 | 11 |
| LIMS11      | 0.56608148 | 0.44989588 | 0.277 | 0.625 | 1 | 11 |
| CD821       | 0.57275278 | -0.3492666 | 0.201 | 0.5   | 1 | 11 |
| MS4A6A1     | 0.58177321 | -0.3155061 | 0.726 | 0.875 | 1 | 11 |
| PTGER4      | 0.58554394 | -0.3420267 | 0.164 | 0.5   | 1 | 11 |
| TUBB        | 0.5910091  | 0.63043581 | 0.566 | 1     | 1 | 11 |
| FCMR2       | 0.59413023 | 0.37087825 | 0.489 | 1     | 1 | 11 |
| SLC7A7      | 0.60600406 | 0.63070461 | 0.445 | 0.75  | 1 | 11 |
| PSMA4       | 0.61605884 | 0.52579788 | 0.376 | 0.875 | 1 | 11 |
| JPT1        | 0.62072128 | 0.38894649 | 0.412 | 0.875 | 1 | 11 |
| DMXL2       | 0.6391896  | -0.5359985 | 0.303 | 0.625 | 1 | 11 |
| CDK61       | 0.65757433 | -0.4081777 | 0.088 | 0.5   | 1 | 11 |
| HMGB2       | 0.65995566 | -0.5599886 | 0.365 | 0.625 | 1 | 11 |
| CD73        | 0.66085159 | 0.41730244 | 0.518 | 1     | 1 | 11 |
| HIST3H2A    | 0.66350318 | -0.3065566 | 0.069 | 0.5   | 1 | 11 |
| NLRP3       | 0.6730835  | -0.4969753 | 0.234 | 0.625 | 1 | 11 |
| IL7R5       | 0.6937862  | 0.29189567 | 0.635 | 1     | 1 | 11 |
| ID1         | 0.69803302 | -0.4820731 | 0.077 | 0.5   | 1 | 11 |
| FCRL1       | 0.70129084 | -0.2695219 | 0.036 | 0.125 | 1 | 11 |
| HS2D1       | 0.71139972 | 0.35243974 | 0.157 | 0.5   | 1 | 11 |
| RETN1       | 0.71192259 | 0.2587663  | 0.606 | 0.875 | 1 | 11 |
| IGLC3       | 0.71841386 | -0.4947636 | 0.033 | 0.125 | 1 | 11 |
| UCHL5       | 0.72791474 | 0.25006686 | 0.161 | 0.625 | 1 | 11 |
| IGLC2       | 0.72824016 | -0.5022429 | 0.033 | 0.125 | 1 | 11 |
| ALDH2       | 0.73603028 | 0.42621389 | 0.358 | 0.75  | 1 | 11 |
| ADA2        | 0.73655376 | 0.29212501 | 0.453 | 0.875 | 1 | 11 |
| IGHA1       | 0.73663049 | -0.6762681 | 0.029 | 0.125 | 1 | 11 |
| RNASE2      | 0.73778245 | -0.4984757 | 0.073 | 0.5   | 1 | 11 |
| EFHD22      | 0.74822215 | -0.5206136 | 0.46  | 0.75  | 1 | 11 |
| SLC40A1     | 0.75220483 | 0.2684401  | 0.15  | 0.5   | 1 | 11 |
| NPM11       | 0.75614118 | -0.2786917 | 0.85  | 1     | 1 | 11 |
| ANP32E      | 0.76602053 | 0.31751149 | 0.328 | 0.75  | 1 | 11 |
| CD302       | 0.7678066  | 0.28113982 | 0.318 | 0.75  | 1 | 11 |
| LILRA2      | 0.77066807 | 0.26919995 | 0.332 | 0.75  | 1 | 11 |
| JAKMIP1     | 0.77724232 | -0.3526992 | 0.022 | 0.125 | 1 | 11 |
| PIIB3       | 0.78215679 | -0.4136994 | 0.766 | 1     | 1 | 11 |
| ANKRD28     | 0.78750929 | -0.4860579 | 0.051 | 0.5   | 1 | 11 |
| HCK         | 0.78771559 | 0.53731466 | 0.522 | 0.875 | 1 | 11 |
| CSAR1       | 0.79718447 | -0.4553677 | 0.328 | 0.5   | 1 | 11 |
| LCK1        | 0.80462659 | 0.28687694 | 0.595 | 1     | 1 | 11 |
| FCRL5       | 0.81294346 | -0.3101984 | 0.018 | 0.125 | 1 | 11 |
| SPCS2       | 0.81308729 | 0.33458756 | 0.412 | 0.75  | 1 | 11 |
| IGKV4-11    | 0.83150395 | 0.39189399 | 0.015 | 0.375 | 1 | 11 |
| Cl2orf752   | 0.8324905  | 0.30391861 | 0.175 | 0.625 | 1 | 11 |
| MCTP1       | 0.8324905  | 0.27574635 | 0.175 | 0.625 | 1 | 11 |
| MARCKS      | 0.83306977 | -0.253665  | 0.299 | 0.5   | 1 | 11 |
| ATP5MC1     | 0.84412631 | 0.28473284 | 0.42  | 0.75  | 1 | 11 |
| PCSKIN1     | 0.84539848 | -0.469473  | 0.018 | 0.25  | 1 | 11 |
| ABRACL2     | 0.8530544  | 0.45069502 | 0.566 | 1     | 1 | 11 |
| TOR3A       | 0.85817957 | 0.28249338 | 0.179 | 0.625 | 1 | 11 |
| ZFH31       | 0.87035947 | -0.4956095 | 0.153 | 0.5   | 1 | 11 |
| HMGA1       | 0.87302366 | -0.3342761 | 0.281 | 0.625 | 1 | 11 |
| XIST2       | 0.87675235 | 0.40185158 | 0.453 | 0.875 | 1 | 11 |
| CCT8        | 0.87712357 | 0.2624049  | 0.354 | 0.75  | 1 | 11 |
| DPYSL2      | 0.88365035 | 0.33722107 | 0.182 | 0.625 | 1 | 11 |
| CD3D5       | 0.88970217 | 0.53132736 | 0.588 | 1     | 1 | 11 |
| PRAMI       | 0.89582275 | -0.4088874 | 0.391 | 0.75  | 1 | 11 |

|             |            |            |       |       |            |    |
|-------------|------------|------------|-------|-------|------------|----|
| HLA-DMB     | 0.89863465 | 0.38868023 | 0.438 | 0.875 | 1          | 11 |
| IFI272      | 0.90598639 | -1.045154  | 0.007 | 0.125 | 1          | 11 |
| LILRB4      | 0.90681987 | -0.4830289 | 0.164 | 0.5   | 1          | 11 |
| NAA2        | 0.90740861 | 0.29946999 | 0.464 | 0.875 | 1          | 11 |
| NOSIP3      | 0.91606451 | 0.26050686 | 0.653 | 1     | 1          | 11 |
| TGFBI       | 0.91971799 | 0.29495754 | 0.493 | 0.875 | 1          | 11 |
| IGHV3-741   | 0.9309668  | -0.4079816 | 0.004 | 0.125 | 1          | 11 |
| TRBV7-3     | 0.9309668  | -0.4705446 | 0.004 | 0.125 | 1          | 11 |
| LINC024461  | 0.93222465 | 0.35749831 | 0.102 | 0.25  | 1          | 11 |
| CD831       | 0.93387514 | 0.31272288 | 0.19  | 0.625 | 1          | 11 |
| CITED2      | 0.93517271 | -0.2701529 | 0.394 | 0.625 | 1          | 11 |
| H2AFZ       | 0.94055054 | 0.27594588 | 0.613 | 1     | 1          | 11 |
| ALDH3B1     | 0.94084084 | -0.5163068 | 0.168 | 0.5   | 1          | 11 |
| AC007952.41 | 0.96554549 | 0.28560834 | 0.588 | 1     | 1          | 11 |
| PECAM11     | 0.96734538 | 0.61976735 | 0.434 | 0.875 | 1          | 11 |
| MIDN1       | 0.97769399 | -0.3655382 | 0.35  | 0.625 | 1          | 11 |
| PDIA6       | 0.97775651 | 0.28892555 | 0.354 | 0.75  | 1          | 11 |
| MRPL51      | 0.98164345 | -0.4145095 | 0.343 | 0.625 | 1          | 11 |
| MTCH2       | 0.98305298 | 0.30392017 | 0.197 | 0.625 | 1          | 11 |
| NDUFB61     | 0.98563686 | 0.48275392 | 0.336 | 0.75  | 1          | 11 |
| ITGAM       | 0.9979153  | -0.5631564 | 0.318 | 0.625 | 1          | 11 |
| IL326       | 2.20E-22   | 0.33401294 | 0.142 | 1     | 4.41E-19   | 12 |
| CXCL82      | 2.01E-15   | -0.3011659 | 0.009 | 0.25  | 4.03E-12   | 12 |
| CIQA1       | 4.28E-12   | -0.5299938 | 0.033 | 0.269 | 8.56E-09   | 12 |
| APOBEC3A    | 3.09E-11   | -0.2530685 | 0.038 | 0.288 | 6.17E-08   | 12 |
| PPBP3       | 7.83E-10   | -0.4638976 | 0.005 | 0.308 | 1.57E-06   | 12 |
| C1QB1       | 1.99E-07   | -0.533561  | 0.005 | 0.231 | 0.00039713 | 12 |
| RGS22       | 0.00046369 | -0.3164954 | 0.583 | 0.904 | 0.92738727 | 12 |
| NR4A22      | 0.00079166 | -0.2896976 | 0.474 | 0.885 | 1          | 12 |
| EREG1       | 0.00179275 | -0.315558  | 0.071 | 0.635 | 1          | 12 |
| TNFAIP34    | 0.00893299 | -0.3892237 | 0.18  | 0.673 | 1          | 12 |
| IFITM34     | 0.01104014 | -0.4501282 | 0.848 | 0.981 | 1          | 12 |
| FCERIA      | 0.02382713 | 0.39094812 | 0.815 | 1     | 1          | 12 |
| IGLV2-142   | 0.02591948 | 0.29738766 | 0.019 | 0.346 | 1          | 12 |
| NEAT13      | 0.04555141 | -0.2665981 | 0.848 | 0.962 | 1          | 12 |
| MAP3K82     | 0.04592905 | -0.2660255 | 0.521 | 0.788 | 1          | 12 |
| TAGLN23     | 0.06126765 | 0.25262821 | 0.962 | 1     | 1          | 12 |
| RGS13       | 0.11106546 | -0.2598476 | 0.133 | 0.481 | 1          | 12 |
| IFI44L8     | 0.11440171 | -0.3227716 | 0.028 | 0.346 | 1          | 12 |
| TLN12       | 0.21347528 | -0.2500056 | 0.834 | 0.962 | 1          | 12 |
| IFI62       | 0.34971538 | -0.3124317 | 0.299 | 0.558 | 1          | 12 |
| CD832       | 0.35446804 | -0.2779691 | 0.455 | 0.769 | 1          | 12 |
| MAFF        | 0.42970889 | -0.2510506 | 0.028 | 0.481 | 1          | 12 |
| CFD1        | 0.5393561  | -0.262052  | 0.427 | 0.673 | 1          | 12 |
| TNF5        | 0.59413115 | -0.3200648 | 0.076 | 0.558 | 1          | 12 |
| IFI273      | 0.62632906 | -0.9117233 | 0.005 | 0.212 | 1          | 12 |
| ENHO        | 0.65206271 | 0.31955369 | 0.483 | 0.846 | 1          | 12 |
| MTRNR2L122  | 0.74391092 | 0.28743197 | 1     | 1     | 1          | 12 |
| MT2A7       | 0.77866119 | -0.6318644 | 0.464 | 0.615 | 1          | 12 |
| TIPARP3     | 0.94519987 | -0.2976637 | 0.133 | 0.538 | 1          | 12 |
| AREG3       | 0.94834175 | -0.3382744 | 0.076 | 0.519 | 1          | 12 |
| MINDY4      | 6.30E-14   | -0.2672557 | 0     | 0.982 | 1.26E-10   | 13 |
| PLXNB2      | 1.60E-13   | -0.3130329 | 0     | 0.956 | 3.19E-10   | 13 |
| TCF41       | 1.68E-13   | -0.3119241 | 0     | 0.965 | 3.36E-10   | 13 |
| NKG74       | 2.13E-13   | 1.68999672 | 0.125 | 0.026 | 4.25E-10   | 13 |
| FGR2        | 1.44E-12   | -0.3944978 | 0.042 | 1     | 2.88E-09   | 13 |
| CD8B3       | 1.69E-12   | 0.3628714  | 0.042 | 1     | 3.39E-09   | 13 |
| TRBV4-24    | 2.65E-12   | 0.59337463 | 0.042 | 0.991 | 5.30E-09   | 13 |
| CKS2        | 4.27E-12   | 0.32277215 | 0.042 | 0.991 | 8.53E-09   | 13 |
| DYTN        | 9.13E-12   | -0.2522504 | 0.042 | 0.965 | 1.83E-08   | 13 |
| AR          | 9.13E-12   | -0.3528971 | 0.042 | 0.965 | 1.83E-08   | 13 |
| LINC024321  | 9.49E-12   | -0.289957  | 0.042 | 0.965 | 1.90E-08   | 13 |
| CD833       | 1.06E-11   | 0.30918797 | 0.042 | 0.982 | 2.11E-08   | 13 |
| SULT1A11    | 1.42E-11   | -0.4004125 | 0     | 0.939 | 2.84E-08   | 13 |
| P2RY1       | 1.91E-11   | -0.6353044 | 0.042 | 0.965 | 3.82E-08   | 13 |
| IDH23       | 5.92E-11   | 0.3398858  | 0.167 | 0.088 | 1.18E-07   | 13 |
| ATP1B1      | 6.98E-11   | -0.7953349 | 0.042 | 0.947 | 1.40E-07   | 13 |
| TENT5C      | 7.68E-11   | 0.54221483 | 0.125 | 0.079 | 1.54E-07   | 13 |
| SLC25A391   | 1.11E-10   | 0.41402742 | 0.125 | 0.088 | 2.21E-07   | 13 |
| ETS2        | 1.16E-10   | -0.385079  | 0.042 | 0.956 | 2.33E-07   | 13 |
| KLRB14      | 1.42E-10   | 0.6256226  | 0.083 | 1     | 2.84E-07   | 13 |
| KLRD14      | 1.42E-10   | 0.61340716 | 0.083 | 1     | 2.84E-07   | 13 |
| FCGR3A3     | 1.42E-10   | 0.43709678 | 0.083 | 1     | 2.84E-07   | 13 |
| CD300A      | 1.42E-10   | 0.43606466 | 0.083 | 1     | 2.84E-07   | 13 |
| KLRF11      | 2.10E-10   | 0.27541261 | 0.083 | 0.991 | 4.20E-07   | 13 |
| HERPUD13    | 2.25E-10   | 0.47602251 | 0.167 | 0.105 | 4.50E-07   | 13 |
| NUCB22      | 2.51E-10   | 0.25933592 | 0.167 | 0.096 | 5.02E-07   | 13 |
| FAM30A1     | 2.74E-10   | -0.4003928 | 0.042 | 0.939 | 5.48E-07   | 13 |
| MYOM22      | 3.10E-10   | 0.33343309 | 0.083 | 0.982 | 6.19E-07   | 13 |
| PRF12       | 3.17E-10   | 0.64216426 | 0.083 | 0.991 | 6.35E-07   | 13 |
| HACD3       | 3.17E-10   | 0.43418861 | 0.083 | 0.991 | 6.35E-07   | 13 |
| HOPX3       | 3.17E-10   | 0.26033412 | 0.083 | 0.991 | 6.35E-07   | 13 |
| GNLY6       | 3.71E-10   | 2.25827784 | 0.125 | 0.105 | 7.42E-07   | 13 |
| RPS27L1     | 3.97E-10   | 0.38454426 | 0.292 | 0.105 | 7.95E-07   | 13 |
| MEIS1       | 4.02E-10   | -0.5660577 | 0.083 | 0.965 | 8.04E-07   | 13 |
| LAPTM4B     | 4.14E-10   | -0.4193925 | 0.083 | 0.974 | 8.27E-07   | 13 |
| LTA4H1      | 4.24E-10   | -0.3279964 | 0.083 | 0.982 | 8.48E-07   | 13 |
| PAD14       | 4.32E-10   | 0.45263851 | 0.25  | 0.096 | 8.65E-07   | 13 |
| HLA-DPB14   | 4.48E-10   | 0.55363567 | 0.167 | 0.105 | 8.97E-07   | 13 |
| XL23        | 4.55E-10   | 0.31009953 | 0.083 | 0.974 | 9.09E-07   | 13 |
| CLIC32      | 4.67E-10   | 0.71701257 | 0.083 | 0.982 | 9.33E-07   | 13 |
| SKA2        | 5.13E-10   | -0.2661321 | 0     | 0.904 | 1.03E-06   | 13 |
| CYBSD22     | 6.29E-10   | 0.34749907 | 0.083 | 0.982 | 1.26E-06   | 13 |
| CD160       | 6.64E-10   | 0.32601033 | 0.083 | 0.965 | 1.33E-06   | 13 |
| LYAR        | 6.75E-10   | 0.45138584 | 0.083 | 0.982 | 1.35E-06   | 13 |
| LGMN        | 8.65E-10   | -0.6923815 | 0.083 | 0.974 | 1.73E-06   | 13 |
| CACYBP1     | 8.87E-10   | -0.2749999 | 0.042 | 0.105 | 1.77E-06   | 13 |
| ADAMTS1     | 9.67E-10   | 0.28140246 | 0.083 | 0.956 | 1.93E-06   | 13 |

|             |          |            |       |       |            |    |
|-------------|----------|------------|-------|-------|------------|----|
| DCAF12      | 1.04E-09 | 0.26887382 | 0.125 | 0.114 | 2.09E-06   | 13 |
| PEA15       | 1.20E-09 | -0.6170647 | 0     | 0.105 | 2.41E-06   | 13 |
| VIM3        | 1.48E-09 | 0.36885252 | 0.333 | 0.123 | 2.97E-06   | 13 |
| GZMA4       | 1.79E-09 | 0.43521259 | 0.042 | 0.114 | 3.58E-06   | 13 |
| EPST113     | 2.47E-09 | -0.4070519 | 0.083 | 0.114 | 4.94E-06   | 13 |
| APOBEC3A1   | 4.57E-09 | 0.28282701 | 0.083 | 0.947 | 9.14E-06   | 13 |
| MCM6        | 6.27E-09 | -0.3127245 | 0     | 0.123 | 1.25E-05   | 13 |
| PSMB21      | 6.27E-09 | -0.3400341 | 0     | 0.123 | 1.25E-05   | 13 |
| SLC11A1     | 6.40E-09 | -0.4917044 | 0.042 | 0.904 | 1.28E-05   | 13 |
| SELL3       | 6.68E-09 | 0.29368188 | 0.125 | 1     | 1.34E-05   | 13 |
| CCR72       | 6.91E-09 | 0.28213391 | 0.125 | 1     | 1.38E-05   | 13 |
| MSRB3       | 7.83E-09 | -0.3580169 | 0.125 | 0.114 | 1.57E-05   | 13 |
| SAMD32      | 7.90E-09 | 0.30717789 | 0.125 | 1     | 1.58E-05   | 13 |
| PTGDR2      | 1.32E-08 | 0.39677285 | 0.125 | 0.982 | 2.63E-05   | 13 |
| PTGER2      | 1.37E-08 | 0.27641222 | 0.083 | 0.947 | 2.75E-05   | 13 |
| IFI44L9     | 1.39E-08 | -0.299742  | 0     | 0.132 | 2.78E-05   | 13 |
| LEFT2       | 1.43E-08 | 0.27838485 | 0.125 | 0.991 | 2.87E-05   | 13 |
| PBX1        | 1.50E-08 | 0.58326332 | 0.333 | 0.158 | 3.01E-05   | 13 |
| DCTPP1      | 1.88E-08 | 0.25949898 | 0.125 | 0.982 | 3.75E-05   | 13 |
| H2AFV       | 2.30E-08 | 0.48738829 | 0.208 | 0.167 | 4.59E-05   | 13 |
| TNFRSF1B    | 2.66E-08 | 0.32639778 | 0.125 | 0.982 | 5.32E-05   | 13 |
| CCT6A       | 3.67E-08 | -0.3814238 | 0.125 | 0.974 | 7.33E-05   | 13 |
| C1orf74     | 4.09E-08 | 0.25931091 | 0.083 | 0.93  | 8.19E-05   | 13 |
| ANKRD281    | 4.47E-08 | 0.27290416 | 0.167 | 0.158 | 8.94E-05   | 13 |
| PDZK11P1    | 4.99E-08 | 0.63778548 | 0.458 | 0.175 | 9.98E-05   | 13 |
| PTAFR       | 5.84E-08 | -0.4278505 | 0.125 | 0.956 | 0.00011676 | 13 |
| SYNGR2      | 5.90E-08 | 0.32682325 | 0.125 | 0.974 | 0.00011802 | 13 |
| CHMP1B1     | 5.90E-08 | 0.32033206 | 0.125 | 0.974 | 0.00011802 | 13 |
| CCT51       | 6.09E-08 | 0.2614959  | 0.125 | 0.974 | 0.00012179 | 13 |
| SPDYC       | 6.28E-08 | -0.7349699 | 0.125 | 0.956 | 0.00012568 | 13 |
| LYST2       | 6.53E-08 | -0.3136121 | 0.167 | 0.158 | 0.00013064 | 13 |
| CTNNA1      | 9.05E-08 | -0.7978602 | 0.042 | 0.149 | 0.00018099 | 13 |
| CRTAP2      | 1.04E-07 | -0.5513697 | 0.167 | 1     | 0.00020844 | 13 |
| PGAM1       | 1.13E-07 | 0.85238471 | 0.292 | 0.193 | 0.00022555 | 13 |
| MYC2        | 1.14E-07 | 0.40118891 | 0.125 | 0.965 | 0.00022707 | 13 |
| FDP5        | 1.25E-07 | -0.3217641 | 0.125 | 0.956 | 0.00024905 | 13 |
| LGALS13     | 1.50E-07 | -0.4959208 | 0.125 | 0.167 | 0.00029934 | 13 |
| BANK11      | 1.81E-07 | 0.29303855 | 0.167 | 1     | 0.00036184 | 13 |
| PDIA4       | 1.84E-07 | 0.41044219 | 0.083 | 0.175 | 0.00036773 | 13 |
| S100A12     | 1.98E-07 | -0.3863115 | 0.083 | 0.886 | 0.00039555 | 13 |
| ABLIM3      | 2.03E-07 | 0.58785493 | 0.458 | 0.202 | 0.00040618 | 13 |
| PKIG        | 2.19E-07 | -0.2733136 | 0.167 | 0.974 | 0.00043743 | 13 |
| MYEOV       | 2.25E-07 | 0.28421699 | 0.125 | 0.904 | 0.00044911 | 13 |
| CKLF        | 2.27E-07 | 0.27382933 | 0.083 | 0.912 | 0.00045447 | 13 |
| TCF73       | 2.76E-07 | 0.39673488 | 0.167 | 1     | 0.00055187 | 13 |
| CASP11      | 2.93E-07 | 0.37893349 | 0.167 | 1     | 0.00058588 | 13 |
| PROS1       | 2.93E-07 | 0.63836943 | 0.458 | 0.211 | 0.00058602 | 13 |
| GATA2       | 3.61E-07 | -0.4144498 | 0.167 | 0.965 | 0.00072151 | 13 |
| DAAM11      | 3.74E-07 | -0.3315272 | 0.208 | 0.184 | 0.00074767 | 13 |
| SOCS2       | 3.85E-07 | -0.28295   | 0     | 0.149 | 0.00076965 | 13 |
| IGFBP21     | 4.02E-07 | -0.6524127 | 0     | 0.167 | 0.00080489 | 13 |
| LYZ3        | 4.54E-07 | 0.66098749 | 0.125 | 0.193 | 0.00090819 | 13 |
| ANXA21      | 4.71E-07 | 0.64030463 | 0.167 | 0.991 | 0.00094124 | 13 |
| FCMR3       | 4.85E-07 | 0.37887737 | 0.167 | 0.991 | 0.0009693  | 13 |
| CCT3        | 4.99E-07 | 0.36895228 | 0.167 | 0.991 | 0.00099816 | 13 |
| FBL1        | 4.99E-07 | 0.31224479 | 0.167 | 0.991 | 0.00099816 | 13 |
| ATPSMC3     | 5.14E-07 | 0.37212833 | 0.167 | 0.202 | 0.00102784 | 13 |
| AL157895.1  | 5.50E-07 | -0.2884215 | 0.167 | 0.965 | 0.00109914 | 13 |
| SMIM1       | 5.55E-07 | -0.5397085 | 0     | 0.158 | 0.00111    | 13 |
| CORO1A2     | 6.62E-07 | 0.41350573 | 0.333 | 0.228 | 0.00132302 | 13 |
| AC074327.1  | 7.16E-07 | -0.499799  | 0.083 | 0.167 | 0.00143204 | 13 |
| AC007952.42 | 8.66E-07 | 0.30854834 | 0.167 | 0.982 | 0.00173286 | 13 |
| MTIX1       | 9.00E-07 | -0.6862746 | 0.042 | 0.184 | 0.00179909 | 13 |
| PA2G42      | 1.01E-06 | 0.51782263 | 0.208 | 0.228 | 0.00201075 | 13 |
| PIM21       | 1.44E-06 | 0.25042087 | 0.125 | 0.211 | 0.0028759  | 13 |
| CD2         | 1.58E-06 | 0.3679308  | 0.125 | 0.211 | 0.00315362 | 13 |
| PRDX12      | 1.62E-06 | 0.26659592 | 0.167 | 0.974 | 0.00323717 | 13 |
| FRMD4B      | 1.67E-06 | -1.3228152 | 0.208 | 1     | 0.0033466  | 13 |
| ZFP361      | 1.71E-06 | 0.27629974 | 0.167 | 0.965 | 0.00342389 | 13 |
| AIF12       | 2.02E-06 | 0.34608187 | 0.167 | 0.965 | 0.00404822 | 13 |
| ATP2B1-AS14 | 2.25E-06 | 0.3180485  | 0.125 | 0.921 | 0.00449845 | 13 |
| MYDGF1      | 2.82E-06 | 0.38957689 | 0.167 | 0.965 | 0.00564056 | 13 |
| HIST1H2AE   | 2.85E-06 | -0.3618995 | 0.083 | 0.202 | 0.00569321 | 13 |
| CXCL16      | 2.91E-06 | -0.4037027 | 0.208 | 1     | 0.00582633 | 13 |
| CDK62       | 4.37E-06 | -0.2739693 | 0     | 0.202 | 0.00874015 | 13 |
| PEAR1       | 4.43E-06 | -0.4127099 | 0.208 | 0.956 | 0.00885891 | 13 |
| GATA1       | 5.17E-06 | -0.6155642 | 0.208 | 0.939 | 0.01034229 | 13 |
| DECR1       | 5.29E-06 | 0.47772648 | 0.208 | 0.254 | 0.01057182 | 13 |
| HSPA81      | 5.88E-06 | 0.61339393 | 0.208 | 1     | 0.01176274 | 13 |
| BMP6        | 5.91E-06 | -0.316303  | 0.208 | 0.965 | 0.01182075 | 13 |
| PSME22      | 6.20E-06 | 0.33934543 | 0.208 | 1     | 0.01240534 | 13 |
| TRBC22      | 6.72E-06 | 0.66522815 | 0.208 | 1     | 0.01343259 | 13 |
| FHL2        | 6.78E-06 | -0.2754188 | 0.083 | 0.202 | 0.01356249 | 13 |
| MDK         | 6.98E-06 | -0.4084954 | 0.042 | 0.211 | 0.01395351 | 13 |
| C1orf211    | 7.12E-06 | 0.30078683 | 0.125 | 0.895 | 0.01423405 | 13 |
| AL138963.38 | 8.29E-06 | 0.43796267 | 0.208 | 0.991 | 0.01658498 | 13 |
| SAMD14      | 8.67E-06 | -0.7479519 | 0.125 | 0.202 | 0.01733024 | 13 |
| IL7R6       | 8.74E-06 | 0.42981266 | 0.208 | 0.991 | 0.0174772  | 13 |
| FGFBP24     | 1.01E-05 | 0.39229141 | 0.125 | 0.886 | 0.02015095 | 13 |
| NDUFAB12    | 1.05E-05 | 0.35905663 | 0.208 | 0.991 | 0.02097515 | 13 |
| SHMT2       | 1.08E-05 | 0.28745581 | 0.208 | 0.991 | 0.0215264  | 13 |
| PRDX22      | 1.13E-05 | 0.27256605 | 0.208 | 0.991 | 0.02267067 | 13 |
| TSPAN9      | 1.17E-05 | 0.30048198 | 0.292 | 0.272 | 0.02343862 | 13 |
| NR4A23      | 1.71E-05 | 0.27972205 | 0.208 | 0.982 | 0.03415941 | 13 |
| TRBC13      | 1.75E-05 | 0.51887422 | 0.208 | 0.982 | 0.03503695 | 13 |
| VWF         | 2.12E-05 | 0.317818   | 0.208 | 0.956 | 0.0423329  | 13 |
| GPI1        | 2.80E-05 | -0.252712  | 0.125 | 0.246 | 0.0559317  | 13 |
| PGD1        | 3.17E-05 | 0.37757388 | 0.542 | 0.307 | 0.06347353 | 13 |

|            |            |            |       |       |            |    |
|------------|------------|------------|-------|-------|------------|----|
| HIST1H1E1  | 3.35E-05   | 0.25152644 | 0.208 | 0.965 | 0.06703825 | 13 |
| YWHAQ3     | 3.93E-05   | 0.55221871 | 0.375 | 0.307 | 0.07856449 | 13 |
| CTSWS5     | 4.31E-05   | 0.44905858 | 0.292 | 0.281 | 0.08613531 | 13 |
| TNFSF4     | 4.88E-05   | -0.4379975 | 0.25  | 0.965 | 0.09769333 | 13 |
| PLEK2      | 5.04E-05   | 0.75486983 | 0.583 | 0.412 | 0.10086103 | 13 |
| CTDSPL     | 5.40E-05   | -0.2871958 | 0.25  | 0.965 | 0.10805027 | 13 |
| IFI27L1    | 5.61E-05   | -0.2896653 | 0.042 | 0.246 | 0.11227996 | 13 |
| SLBP       | 6.46E-05   | -0.331875  | 0.25  | 0.965 | 0.12912038 | 13 |
| CTTN       | 7.17E-05   | 0.47050827 | 0.5   | 0.342 | 0.14334574 | 13 |
| CD822      | 8.20E-05   | -0.5335341 | 0.292 | 0.991 | 0.16393932 | 13 |
| PARD3      | 8.40E-05   | -0.5020086 | 0.208 | 0.904 | 0.16795257 | 13 |
| MEF2C1     | 8.67E-05   | 0.41223193 | 0.25  | 0.298 | 0.17349479 | 13 |
| LCK2       | 9.19E-05   | 0.3666788  | 0.25  | 1     | 0.18372373 | 13 |
| TBXA2R     | 9.51E-05   | -0.741032  | 0.292 | 0.974 | 0.19024816 | 13 |
| AP001189.3 | 9.89E-05   | 0.41811059 | 0.25  | 0.289 | 0.19774086 | 13 |
| GNG8       | 0.00010012 | -0.7144949 | 0     | 0.123 | 0.20023491 | 13 |
| NOSIP4     | 0.00012689 | 0.31375376 | 0.25  | 0.991 | 0.2537879  | 13 |
| TRBV7-4    | 0.00013242 | 0.47801104 | 0.25  | 0.991 | 0.264843   | 13 |
| PPIA1      | 0.00013794 | 0.60097605 | 0.625 | 0.404 | 0.27587361 | 13 |
| TUBB2A1    | 0.00014608 | -0.2795878 | 0.042 | 0.263 | 0.29216955 | 13 |
| GP6        | 0.00016187 | 0.50321416 | 0.333 | 0.316 | 0.32374568 | 13 |
| MT-ND4L1   | 0.0001979  | 0.66231581 | 0.708 | 0.447 | 0.39580618 | 13 |
| RAB27B     | 0.00021013 | 0.46288628 | 0.417 | 0.342 | 0.42026283 | 13 |
| E2F1       | 0.00022078 | -0.6594434 | 0.083 | 0.228 | 0.44156885 | 13 |
| ASAP1      | 0.00024319 | -0.4025865 | 0.25  | 0.947 | 0.48637614 | 13 |
| LCN2       | 0.00028086 | -0.2801002 | 0.208 | 0.281 | 0.56172945 | 13 |
| NEAT14     | 0.00028346 | -0.4116143 | 0.25  | 0.947 | 0.56692058 | 13 |
| HIST1H2AMI | 0.00030534 | -0.6401899 | 0     | 0.202 | 0.61067006 | 13 |
| KLHD8B     | 0.00033047 | -1.2410537 | 0     | 0.237 | 0.66094929 | 13 |
| FSTL1      | 0.00033771 | -0.310101  | 0.083 | 0.246 | 0.67542075 | 13 |
| CD3D6      | 0.00036639 | 0.55649477 | 0.208 | 0.921 | 0.73277939 | 13 |
| FHL1       | 0.0003793  | 0.31829472 | 0.5   | 0.351 | 0.75859944 | 13 |
| AC123912.4 | 0.00038827 | -0.8659214 | 0.292 | 0.965 | 0.77654099 | 13 |
| VDAC1      | 0.00058437 | 0.46302479 | 0.25  | 0.965 | 1          | 13 |
| UBE2J11    | 0.00060912 | 0.34482731 | 0.25  | 0.316 | 1          | 13 |
| DAB2       | 0.00079853 | -1.2422314 | 0.417 | 0.982 | 1          | 13 |
| ALOX5A1    | 0.00082828 | 0.50155079 | 0.25  | 0.956 | 1          | 13 |
| MAP1A1     | 0.00092137 | -0.7282278 | 0.375 | 0.991 | 1          | 13 |
| MMD        | 0.00094647 | -1.4635976 | 0.708 | 0.982 | 1          | 13 |
| HSPA55     | 0.00095383 | 0.4764226  | 0.25  | 0.947 | 1          | 13 |
| HIF0       | 0.00102831 | -0.3261844 | 0.167 | 0.316 | 1          | 13 |
| TYROBP1    | 0.00135578 | 0.40823609 | 0.167 | 0.342 | 1          | 13 |
| HSP90B14   | 0.00136468 | 0.37333425 | 0.292 | 0.991 | 1          | 13 |
| ZFP36L24   | 0.00141892 | 0.76222352 | 0.292 | 0.991 | 1          | 13 |
| CD75       | 0.00141892 | 0.68478975 | 0.292 | 0.991 | 1          | 13 |
| FKBP22     | 0.00143364 | 0.27468022 | 0.125 | 0.807 | 1          | 13 |
| TNS1       | 0.00188621 | 0.36684533 | 0.292 | 0.982 | 1          | 13 |
| LTB4       | 0.00200083 | 0.4677405  | 0.25  | 0.921 | 1          | 13 |
| CTSS1      | 0.00210327 | 0.29941355 | 0.125 | 0.798 | 1          | 13 |
| FAM110A    | 0.00220924 | -0.6706041 | 0.375 | 0.991 | 1          | 13 |
| CD272      | 0.00226763 | 0.58459476 | 0.125 | 0.798 | 1          | 13 |
| HNRNPA2B13 | 0.00248092 | 0.37019433 | 0.542 | 0.447 | 1          | 13 |
| STXB2P1    | 0.00256784 | -0.7325188 | 0.417 | 0.982 | 1          | 13 |
| AP001189.1 | 0.00262828 | 0.40565623 | 0.833 | 0.921 | 1          | 13 |
| PYGL1      | 0.00269913 | 0.29685952 | 0.208 | 0.342 | 1          | 13 |
| ELOVL7     | 0.00336081 | -0.2808598 | 0.333 | 0.956 | 1          | 13 |
| SH3BGR2    | 0.00357396 | 0.36030234 | 0.583 | 0.421 | 1          | 13 |
| PNP1       | 0.00368398 | -0.3921018 | 0.292 | 0.333 | 1          | 13 |
| PDGFA      | 0.00368398 | -0.7230441 | 0.375 | 0.974 | 1          | 13 |
| VDAC32     | 0.00371124 | 0.29908167 | 0.625 | 0.43  | 1          | 13 |
| CTSA1      | 0.00378308 | -0.610895  | 0.917 | 0.982 | 1          | 13 |
| MT-ATP82   | 0.00391847 | 0.50827894 | 0.708 | 0.605 | 1          | 13 |
| PTMS1      | 0.00397808 | -0.2748531 | 0.042 | 0.325 | 1          | 13 |
| TUBB4B1    | 0.00450792 | 0.81061153 | 0.542 | 0.482 | 1          | 13 |
| MINDY1     | 0.00480704 | -0.4167626 | 0.292 | 0.36  | 1          | 13 |
| FOS5       | 0.00488444 | -0.304639  | 0.25  | 0.877 | 1          | 13 |
| HMGA11     | 0.00509334 | -1.1629252 | 0.042 | 0.325 | 1          | 13 |
| LGALS121   | 0.00512859 | 0.41103683 | 0.333 | 0.965 | 1          | 13 |
| PRKCD      | 0.00690908 | 0.3858139  | 0.333 | 0.982 | 1          | 13 |
| ITM2A      | 0.00692578 | 0.40761275 | 0.208 | 0.395 | 1          | 13 |
| NPM12      | 0.00739067 | 0.59463699 | 0.333 | 0.991 | 1          | 13 |
| LYN1       | 0.0075239  | -0.3908298 | 0.375 | 1     | 1          | 13 |
| DMTN1      | 0.00793493 | 0.56507284 | 0.542 | 0.561 | 1          | 13 |
| EHD3       | 0.00800176 | -0.2991628 | 0.292 | 0.368 | 1          | 13 |
| BEND2      | 0.00813605 | 0.2923067  | 0.333 | 0.965 | 1          | 13 |
| TMEM109    | 0.00827236 | 0.30088945 | 0.208 | 0.842 | 1          | 13 |
| SNCA       | 0.00892041 | 0.3345585  | 0.667 | 0.509 | 1          | 13 |
| ZNF185     | 0.00905228 | -0.7822645 | 0.5   | 0.974 | 1          | 13 |
| FERMT31    | 0.00937559 | 0.56974308 | 0.792 | 0.825 | 1          | 13 |
| NFE2       | 0.0107905  | 0.31633074 | 0.417 | 0.456 | 1          | 13 |
| IL327      | 0.01114346 | 1.34053564 | 0.333 | 0.991 | 1          | 13 |
| AP2S11     | 0.01232663 | 0.4075329  | 0.708 | 0.526 | 1          | 13 |
| CTT81      | 0.01384366 | 0.25401758 | 0.167 | 0.789 | 1          | 13 |
| RGCC2      | 0.01481057 | 0.85118316 | 0.333 | 0.982 | 1          | 13 |
| LMNA4      | 0.01485556 | 0.28186167 | 0.5   | 0.518 | 1          | 13 |
| SELP       | 0.01526154 | 0.48599415 | 0.333 | 0.447 | 1          | 13 |
| TNNC2      | 0.01673962 | -0.6018809 | 0.417 | 0.974 | 1          | 13 |
| PPBP4      | 0.01710093 | 0.38132388 | 1     | 0.991 | 1          | 13 |
| AL954642.1 | 0.01935055 | 0.79075688 | 0.25  | 0.439 | 1          | 13 |
| MYLK       | 0.0199463  | 0.28598103 | 0.458 | 0.465 | 1          | 13 |
| MPP11      | 0.0211117  | 0.5125199  | 0.75  | 0.763 | 1          | 13 |
| ALOX12     | 0.02317386 | -0.7902319 | 0.542 | 0.965 | 1          | 13 |
| RHOC2      | 0.02566968 | -0.5644218 | 0.125 | 0.386 | 1          | 13 |
| TIMP12     | 0.02707705 | -0.4438523 | 0.875 | 0.947 | 1          | 13 |
| C2orf88    | 0.03028389 | -0.4552088 | 0.542 | 0.982 | 1          | 13 |
| TMEM106C   | 0.03200412 | 0.33422142 | 0.375 | 1     | 1          | 13 |
| 2-Jun      | 0.03432314 | 0.75270154 | 0.375 | 1     | 1          | 13 |
| COROIC     | 0.0375742  | -0.342401  | 0.458 | 0.982 | 1          | 13 |



|              |            |            |       |       |          |    |
|--------------|------------|------------|-------|-------|----------|----|
| SMOX         | 0.03888335 | -0.9039523 | 0.5   | 0.851 | 1        | 13 |
| NEXN         | 0.03980288 | -0.4313923 | 0.333 | 0.439 | 1        | 13 |
| GLUL1        | 0.04093976 | -0.4610663 | 0.25  | 0.789 | 1        | 13 |
| GSTP11       | 0.04103426 | 0.53540035 | 0.375 | 0.982 | 1        | 13 |
| ILK2         | 0.0411591  | 0.35009155 | 0.792 | 0.64  | 1        | 13 |
| ACTN13       | 0.04116141 | -0.9718449 | 0.833 | 1     | 1        | 13 |
| TAL1         | 0.04128531 | 0.41433949 | 0.375 | 0.965 | 1        | 13 |
| HIST1H1C2    | 0.04163937 | -0.328047  | 0.458 | 0.439 | 1        | 13 |
| LAT4         | 0.04167296 | -0.4118005 | 0.542 | 0.991 | 1        | 13 |
| FTL          | 0.04286477 | -0.3311216 | 1     | 1     | 1        | 13 |
| TNFSF13B     | 0.04360434 | -0.3440488 | 0.083 | 0.395 | 1        | 13 |
| SLC25A371    | 0.04781062 | -0.2570905 | 0.042 | 0.386 | 1        | 13 |
| ENDOD1       | 0.04891323 | -0.8184879 | 0.542 | 0.982 | 1        | 13 |
| GAPDH1       | 0.04961884 | 0.2781045  | 1     | 0.816 | 1        | 13 |
| P2RX11       | 0.05619126 | -0.308573  | 0.292 | 0.43  | 1        | 13 |
| CAVIN2       | 0.06101883 | 0.31873361 | 1     | 0.93  | 1        | 13 |
| CENPU        | 0.06738904 | -0.2572769 | 0     | 0.167 | 1        | 13 |
| SNAP231      | 0.06746888 | -0.7064332 | 0.708 | 0.825 | 1        | 13 |
| ACTB4        | 0.07092587 | 0.27046933 | 1     | 0.991 | 1        | 13 |
| SAT14        | 0.07359871 | 0.29729638 | 0.958 | 0.921 | 1        | 13 |
| TFPI         | 0.07745363 | -0.4515215 | 0.167 | 0.412 | 1        | 13 |
| TRBV7-25     | 0.07765931 | -0.2863568 | 0     | 0.298 | 1        | 13 |
| FRMD3        | 0.09105484 | -0.9025783 | 0.25  | 0.456 | 1        | 13 |
| GP9          | 0.09693362 | -0.309226  | 0.917 | 0.965 | 1        | 13 |
| CD743        | 0.10253953 | 0.68459093 | 0.417 | 0.991 | 1        | 13 |
| GRAP22       | 0.10877194 | 0.2992572  | 0.875 | 0.728 | 1        | 13 |
| RPLP01       | 0.11108766 | 0.98434527 | 0.417 | 1     | 1        | 13 |
| PPPIR14A     | 0.11171915 | -0.2875658 | 0.458 | 0.991 | 1        | 13 |
| TMEM140      | 0.11358728 | 0.30123135 | 0.375 | 0.544 | 1        | 13 |
| ITGB51       | 0.12410827 | -0.3576281 | 0.458 | 0.956 | 1        | 13 |
| LVL11        | 0.12814634 | -0.5915247 | 0.208 | 0.719 | 1        | 13 |
| MPIG6B       | 0.14033815 | -0.2611373 | 0.958 | 0.956 | 1        | 13 |
| AC012507.4   | 0.14527378 | -0.3943346 | 0.042 | 0.377 | 1        | 13 |
| TRAPPC3L     | 0.15399673 | 0.85695022 | 0.417 | 0.64  | 1        | 13 |
| CST74        | 0.16897272 | -1.1608674 | 0.167 | 0.439 | 1        | 13 |
| 12-Sep       | 0.18734361 | 0.37241614 | 0.292 | 0.807 | 1        | 13 |
| CYTOR1       | 0.19666037 | -0.9881276 | 0.167 | 0.447 | 1        | 13 |
| RAB37        | 0.20112745 | -0.4683893 | 0.5   | 0.86  | 1        | 13 |
| PGRMC1       | 0.20124581 | 0.3182667  | 0.708 | 0.658 | 1        | 13 |
| TSPAN13      | 0.20861968 | -0.4442071 | 0.167 | 0.675 | 1        | 13 |
| STAT16       | 0.2168801  | 0.30418134 | 0.167 | 0.5   | 1        | 13 |
| ARHGAP6      | 0.22808841 | -0.5791315 | 0.583 | 0.877 | 1        | 13 |
| GRHL1        | 0.23005435 | 0.82403229 | 0.417 | 0.974 | 1        | 13 |
| TMSB101      | 0.23683822 | 1.0424479  | 0.458 | 1     | 1        | 13 |
| TUBA4A1      | 0.24378247 | -0.3495103 | 0.917 | 1     | 1        | 13 |
| AP003068.2   | 0.26956253 | -0.5713865 | 0.542 | 0.807 | 1        | 13 |
| STMN11       | 0.27579833 | 0.2797041  | 0.083 | 0.614 | 1        | 13 |
| GSN2         | 0.28201221 | -0.4124792 | 0.667 | 0.991 | 1        | 13 |
| PRKAR2B      | 0.28202759 | -0.2769926 | 0.708 | 1     | 1        | 13 |
| H2AFZ1       | 0.28680646 | -0.3892208 | 0.375 | 0.579 | 1        | 13 |
| CA2          | 0.30608301 | -0.4997477 | 0.375 | 0.553 | 1        | 13 |
| GUCY1B1      | 0.32274852 | -0.5790126 | 0.625 | 0.982 | 1        | 13 |
| S100A61      | 0.33788271 | 0.65662104 | 0.375 | 0.86  | 1        | 13 |
| ODC11        | 0.36134233 | -0.3084266 | 0.875 | 0.991 | 1        | 13 |
| HMGN2        | 0.36400009 | 0.34545009 | 0.375 | 0.851 | 1        | 13 |
| MT-ATP6      | 0.37630779 | -0.7749696 | 1     | 1     | 1        | 13 |
| RGS18        | 0.38545577 | 0.25699207 | 0.792 | 0.877 | 1        | 13 |
| SUB12        | 0.39145062 | 0.37383989 | 0.458 | 0.965 | 1        | 13 |
| SPINT21      | 0.39467131 | -0.2645271 | 0.583 | 0.649 | 1        | 13 |
| TPST21       | 0.42658839 | -0.2695207 | 0.542 | 0.605 | 1        | 13 |
| PDLIM1       | 0.43656345 | -0.2995061 | 0.792 | 0.974 | 1        | 13 |
| SLC40A11     | 0.46693027 | -0.5609688 | 0.708 | 1     | 1        | 13 |
| SMIM31       | 0.47034496 | -0.5330347 | 0.625 | 0.781 | 1        | 13 |
| AL731557.1   | 0.47556022 | -0.7215508 | 0.708 | 0.991 | 1        | 13 |
| CUX11        | 0.49081531 | -0.4964296 | 0.208 | 0.649 | 1        | 13 |
| CKB1         | 0.50061888 | -0.4676696 | 0     | 0.447 | 1        | 13 |
| PKHD1L1      | 0.5007788  | -0.3569611 | 0.125 | 0.491 | 1        | 13 |
| MGLL         | 0.52009958 | -0.6697688 | 0.792 | 1     | 1        | 13 |
| GABARAP      | 0.5723174  | -0.3726368 | 0.583 | 0.64  | 1        | 13 |
| MT-CYB       | 0.57621754 | -0.4188976 | 1     | 1     | 1        | 13 |
| GUCY1A1      | 0.58678883 | -0.3221012 | 0.167 | 0.605 | 1        | 13 |
| CANX1        | 0.59078905 | -0.2537762 | 0.042 | 0.482 | 1        | 13 |
| LINC00989    | 0.5915974  | 0.29256282 | 0.625 | 0.939 | 1        | 13 |
| LIPA1        | 0.59936524 | 0.61975048 | 0.583 | 0.982 | 1        | 13 |
| LGALS3       | 0.6026099  | -0.6034623 | 0.083 | 0.5   | 1        | 13 |
| IFI63        | 0.65055798 | -1.2963205 | 0.125 | 0.482 | 1        | 13 |
| NDUFB62      | 0.65063642 | 0.28845333 | 0.167 | 0.632 | 1        | 13 |
| AC147651.1   | 0.65312541 | -0.3839144 | 0.708 | 0.991 | 1        | 13 |
| LTBP1        | 0.65704628 | 0.29183882 | 0.542 | 0.939 | 1        | 13 |
| ABCC3        | 0.68791239 | -0.5044763 | 0.708 | 0.974 | 1        | 13 |
| RHOBTB1      | 0.70173374 | -0.8997067 | 0.125 | 0.509 | 1        | 13 |
| NTSC3A       | 0.70449415 | -0.4059971 | 0.542 | 0.781 | 1        | 13 |
| STOM         | 0.70864957 | -0.6131351 | 0.5   | 0.658 | 1        | 13 |
| ESAM         | 0.71702911 | -0.3546846 | 0.5   | 0.605 | 1        | 13 |
| ENO12        | 0.72126868 | -0.3083794 | 0.583 | 0.798 | 1        | 13 |
| EGFL7        | 0.72506467 | -0.8255766 | 0.167 | 0.588 | 1        | 13 |
| MAP3K7CL     | 0.73820504 | -0.7372506 | 0.833 | 0.982 | 1        | 13 |
| MIR4435-2HG1 | 0.7508334  | -0.2917188 | 0.417 | 0.649 | 1        | 13 |
| PTGS1        | 0.7809703  | -0.3806178 | 0.958 | 0.991 | 1        | 13 |
| IFI274       | 0.78906605 | -1.8399345 | 0     | 0.518 | 1        | 13 |
| SEPT111      | 0.82418044 | -0.847494  | 0.208 | 0.561 | 1        | 13 |
| CLECB1B      | 0.89270318 | -0.3247146 | 0.458 | 0.658 | 1        | 13 |
| STX11        | 0.89494559 | 0.53970545 | 0.5   | 0.868 | 1        | 13 |
| DYNLL11      | 0.8949797  | -0.6083507 | 0.958 | 0.991 | 1        | 13 |
| SOD2         | 0.89939924 | -0.5172298 | 0.542 | 0.614 | 1        | 13 |
| CST31        | 0.98879528 | -0.2502099 | 0.792 | 0.798 | 1        | 13 |
| CENPK        | 3.30E-11   | -0.335335  | 0     | 1     | 6.59E-08 | 14 |
| RAN          | 3.30E-11   | -0.3883082 | 0     | 1     | 6.59E-08 | 14 |

|             |          |            |       |       |            |    |
|-------------|----------|------------|-------|-------|------------|----|
| HNRNPF      | 3.30E-11 | -0.4275947 | 0     | 1     | 6.59E-08   | 14 |
| CD76        | 3.30E-11 | -0.5463185 | 0     | 1     | 6.59E-08   | 14 |
| SLC9A3R13   | 4.87E-11 | -0.3366919 | 0     | 0.991 | 9.74E-08   | 14 |
| CCT6A1      | 7.31E-11 | -0.2665288 | 0     | 0.991 | 1.46E-07   | 14 |
| NOSIP5      | 7.31E-11 | -0.3220533 | 0     | 0.991 | 1.46E-07   | 14 |
| GBP53       | 1.60E-10 | -0.2628878 | 0     | 0.982 | 3.20E-07   | 14 |
| PSMD81      | 1.60E-10 | -0.5948202 | 0     | 0.982 | 3.20E-07   | 14 |
| TUBB4B2     | 1.60E-10 | -0.8480301 | 0     | 0.982 | 3.20E-07   | 14 |
| GRAIP23     | 1.04E-09 | -0.5075476 | 0     | 0.946 | 2.07E-06   | 14 |
| PGAM11      | 3.19E-09 | -0.4291567 | 0     | 0.946 | 6.37E-06   | 14 |
| Clorf1621   | 3.21E-09 | -0.5380801 | 0.059 | 1     | 6.42E-06   | 14 |
| LTB5        | 4.69E-09 | -0.4483678 | 0.059 | 1     | 9.38E-06   | 14 |
| HLA-DQA21   | 4.89E-09 | 0.62601511 | 0.059 | 1     | 9.78E-06   | 14 |
| FCMR4       | 4.89E-09 | 0.53446228 | 0.059 | 1     | 9.78E-06   | 14 |
| NFE21       | 4.89E-09 | 0.4758734  | 0.059 | 1     | 9.78E-06   | 14 |
| MRPS33      | 4.89E-09 | 0.36510561 | 0.059 | 1     | 9.78E-06   | 14 |
| PRMT12      | 4.89E-09 | 0.25871344 | 0.059 | 1     | 9.78E-06   | 14 |
| PTGER41     | 6.51E-09 | -0.5564735 | 0     | 0.938 | 1.30E-05   | 14 |
| CNN21       | 7.12E-09 | -0.430324  | 0.059 | 0.991 | 1.42E-05   | 14 |
| JPT11       | 9.50E-09 | 0.34116421 | 0.059 | 0.991 | 1.90E-05   | 14 |
| PEA151      | 1.29E-08 | 0.42451686 | 0.059 | 0.973 | 2.58E-05   | 14 |
| IMPDH2      | 1.29E-08 | 0.33517124 | 0.059 | 0.973 | 2.58E-05   | 14 |
| HIST1H1C3   | 1.49E-08 | -0.3466715 | 0.059 | 0.982 | 2.98E-05   | 14 |
| CD3D7       | 1.77E-08 | 0.4518669  | 0.059 | 0.964 | 3.54E-05   | 14 |
| ZNF703      | 1.77E-08 | 0.43496476 | 0.059 | 0.964 | 3.54E-05   | 14 |
| NREP        | 1.80E-08 | 0.70473636 | 0.059 | 0.973 | 3.60E-05   | 14 |
| MRPS26      | 1.82E-08 | 0.61023816 | 0.059 | 0.982 | 3.65E-05   | 14 |
| AC064805.1  | 2.42E-08 | 0.64989244 | 0.059 | 0.955 | 4.84E-05   | 14 |
| MT-CO1      | 3.43E-08 | 0.75916568 | 1     | 1     | 6.86E-05   | 14 |
| PDCD51      | 3.46E-08 | 0.47152399 | 0.059 | 0.973 | 6.92E-05   | 14 |
| RACGAP11    | 3.46E-08 | 0.44101499 | 0.059 | 0.973 | 6.92E-05   | 14 |
| PSMB22      | 3.57E-08 | -0.4576775 | 0     | 0.902 | 7.14E-05   | 14 |
| CD1C        | 4.48E-08 | 0.52354735 | 0.059 | 0.938 | 8.96E-05   | 14 |
| LAT5        | 5.10E-08 | -0.3879594 | 0     | 0.911 | 0.00010207 | 14 |
| SLBP1       | 5.10E-08 | -0.5996985 | 0     | 0.911 | 0.00010207 | 14 |
| WDFY4       | 6.24E-08 | 0.29319541 | 0.059 | 0.964 | 0.0001248  | 14 |
| ADSL        | 9.87E-08 | -0.338815  | 0     | 0.902 | 0.00019734 | 14 |
| GTSE1       | 1.10E-07 | 0.26883799 | 0.059 | 0.911 | 0.00021923 | 14 |
| DHRS9       | 1.10E-07 | 0.26851582 | 0.059 | 0.911 | 0.00021923 | 14 |
| BCL11A      | 1.10E-07 | 0.26326346 | 0.059 | 0.911 | 0.00021923 | 14 |
| IGHV4.4     | 1.15E-07 | 0.44133919 | 0.059 | 0.929 | 0.00022983 | 14 |
| BANF11      | 1.20E-07 | 0.4220463  | 0.059 | 0.955 | 0.00024026 | 14 |
| ILK3        | 1.69E-07 | -0.3263133 | 0.059 | 0.946 | 0.00033797 | 14 |
| NFKBID1     | 1.70E-07 | -0.3843377 | 0.118 | 1     | 0.00033958 | 14 |
| PPA1        | 1.88E-07 | -0.4058181 | 0     | 0.893 | 0.00037635 | 14 |
| PHTF1       | 1.88E-07 | -0.424103  | 0     | 0.893 | 0.00037635 | 14 |
| STEAP4      | 2.01E-07 | 0.37976156 | 0.059 | 0.902 | 0.00040256 | 14 |
| MAL1        | 2.17E-07 | 0.44434191 | 0.059 | 0.938 | 0.00043462 | 14 |
| CDKN1C1     | 2.50E-07 | 0.30324284 | 0.059 | 0.884 | 0.00050062 | 14 |
| FCER21      | 2.60E-07 | 0.52637984 | 0.059 | 0.884 | 0.00051968 | 14 |
| CDK63       | 2.94E-07 | 0.40098128 | 0.059 | 0.938 | 0.00058877 | 14 |
| PSMA41      | 3.32E-07 | 0.3050683  | 0.118 | 1     | 0.00066416 | 14 |
| CFD2        | 3.43E-07 | -0.3631674 | 0.059 | 0.938 | 0.00068596 | 14 |
| ELL23       | 3.54E-07 | -0.3271502 | 0     | 0.116 | 0.00070804 | 14 |
| ASGR21      | 3.54E-07 | -0.3293712 | 0     | 0.116 | 0.00070804 | 14 |
| CCT82       | 3.57E-07 | 0.43913151 | 0.118 | 1     | 0.00071489 | 14 |
| SNX10       | 3.57E-07 | 0.25102535 | 0.118 | 1     | 0.00071489 | 14 |
| MGST2       | 3.65E-07 | 0.26733781 | 0.059 | 0.893 | 0.00073027 | 14 |
| FBL2        | 3.71E-07 | 0.44814415 | 0.118 | 1     | 0.00074163 | 14 |
| CYBSD23     | 3.97E-07 | 0.34161414 | 0.059 | 0.938 | 0.00079448 | 14 |
| TUBA4A2     | 3.99E-07 | 0.41776175 | 0.118 | 1     | 0.00079804 | 14 |
| RETN2       | 4.51E-07 | 0.48514967 | 0.118 | 0.991 | 0.00090286 | 14 |
| BATF3       | 4.54E-07 | 0.27183315 | 0.059 | 0.866 | 0.00090778 | 14 |
| MT-CO2      | 4.55E-07 | 0.71725307 | 1     | 1     | 0.0009091  | 14 |
| C15orf89    | 4.62E-07 | 0.57124488 | 0.118 | 0.134 | 0.00092355 | 14 |
| MT-CO3      | 5.45E-07 | 0.57788258 | 1     | 1     | 0.00109    | 14 |
| BST1        | 6.17E-07 | 0.29238234 | 0.118 | 0.991 | 0.00123409 | 14 |
| RHOC3       | 6.57E-07 | 0.42133228 | 0.118 | 0.982 | 0.00131407 | 14 |
| TOR3A1      | 6.57E-07 | -0.344671  | 0     | 0.125 | 0.00131407 | 14 |
| ANXA62      | 6.57E-07 | -0.5794258 | 0     | 0.875 | 0.00131407 | 14 |
| IL328       | 6.87E-07 | 0.54874022 | 0.118 | 0.991 | 0.00137473 | 14 |
| DNMT12      | 6.98E-07 | -0.4055042 | 0.059 | 0.911 | 0.00139569 | 14 |
| FBP1        | 7.09E-07 | 0.30403746 | 0.059 | 0.929 | 0.00141886 | 14 |
| CIITA       | 7.49E-07 | 0.26840684 | 0.118 | 0.982 | 0.00149721 | 14 |
| XBP1        | 7.65E-07 | -0.5650712 | 0.118 | 0.973 | 0.00153075 | 14 |
| SEC11C      | 8.82E-07 | 0.5682569  | 0.059 | 0.884 | 0.00176441 | 14 |
| MIF2        | 9.82E-07 | 0.25652074 | 0.118 | 0.982 | 0.00196394 | 14 |
| AC245014.32 | 9.82E-07 | -0.4572308 | 0.118 | 0.973 | 0.00196394 | 14 |
| NOPS61      | 1.02E-06 | 0.34383014 | 0.118 | 0.982 | 0.00203474 | 14 |
| HIST1H1E2   | 1.13E-06 | -0.3850229 | 0.118 | 0.973 | 0.00226216 | 14 |
| GRASP3      | 1.20E-06 | -0.6130635 | 0     | 0.134 | 0.00240594 | 14 |
| PDE4B       | 1.20E-06 | -0.8111219 | 0     | 0.866 | 0.00240594 | 14 |
| TRBV181     | 1.33E-06 | 0.47884395 | 0.059 | 0.83  | 0.00265707 | 14 |
| TPPP3       | 1.38E-06 | 0.44526994 | 0.118 | 0.955 | 0.00276854 | 14 |
| ABCC31      | 1.48E-06 | 0.59543614 | 0.118 | 0.955 | 0.0029691  | 14 |
| ADM2        | 1.57E-06 | -0.6337233 | 0     | 0.116 | 0.00313668 | 14 |
| UTY2        | 1.61E-06 | -0.5818113 | 0     | 0.134 | 0.00322241 | 14 |
| MARCKS1     | 1.61E-06 | -0.8746615 | 0     | 0.134 | 0.00322241 | 14 |
| SIGLEC10    | 1.83E-06 | 0.26689331 | 0.118 | 0.964 | 0.00365721 | 14 |
| SEPT112     | 1.87E-06 | 0.67635918 | 0.118 | 0.955 | 0.00374552 | 14 |
| PSMA5       | 1.94E-06 | 0.65958097 | 0.118 | 0.955 | 0.00387728 | 14 |
| SEC61B1     | 1.98E-06 | -0.522939  | 0.118 | 0.955 | 0.00395223 | 14 |
| NOLC1       | 2.17E-06 | -0.2578014 | 0     | 0.857 | 0.00434572 | 14 |
| IGLV2-231   | 2.23E-06 | 0.4552161  | 0.059 | 0.812 | 0.00445391 | 14 |
| PRC1        | 2.82E-06 | -0.2682295 | 0     | 0.83  | 0.00563588 | 14 |
| UGCG        | 2.88E-06 | 0.418865   | 0.118 | 0.964 | 0.00575991 | 14 |
| FKBP23      | 2.88E-06 | 0.30240096 | 0.118 | 0.964 | 0.00575991 | 14 |
| EIF4A3      | 3.18E-06 | -0.2933769 | 0.059 | 0.902 | 0.00635257 | 14 |

|             |            |            |       |       |            |    |
|-------------|------------|------------|-------|-------|------------|----|
| LILRB41     | 4.73E-06   | 0.35426831 | 0.118 | 0.946 | 0.00946469 | 14 |
| THBD        | 5.06E-06   | -0.7312046 | 0     | 0.143 | 0.01012526 | 14 |
| AC103591.37 | 5.12E-06   | -0.5253614 | 0     | 0.152 | 0.01023721 | 14 |
| TP11        | 5.43E-06   | -0.4630443 | 0.059 | 0.893 | 0.01085392 | 14 |
| ANP32E1     | 5.45E-06   | 0.62305853 | 0.118 | 0.955 | 0.01089338 | 14 |
| LSM4        | 6.14E-06   | 0.33729827 | 0.059 | 0.884 | 0.01227947 | 14 |
| PRDX13      | 6.81E-06   | -0.3640699 | 0     | 0.839 | 0.01361386 | 14 |
| GPR1831     | 6.81E-06   | -0.3838088 | 0     | 0.839 | 0.01361386 | 14 |
| CSTA1       | 6.81E-06   | -0.4399769 | 0     | 0.161 | 0.01361386 | 14 |
| S100A121    | 6.81E-06   | -0.7178758 | 0     | 0.161 | 0.01361386 | 14 |
| NINJ11      | 6.88E-06   | -0.562107  | 0.118 | 0.911 | 0.01376887 | 14 |
| CD79B1      | 8.08E-06   | 0.32259222 | 0.118 | 0.946 | 0.01615014 | 14 |
| PILRA       | 8.34E-06   | -0.4804859 | 0.176 | 0.982 | 0.01668383 | 14 |
| EMILIN21    | 9.55E-06   | -0.6709033 | 0.059 | 0.839 | 0.01910473 | 14 |
| CYC1        | 1.18E-05   | -0.2855997 | 0     | 0.17  | 0.02361257 | 14 |
| MIR181A1HG  | 1.18E-05   | -0.5786101 | 0     | 0.17  | 0.02361257 | 14 |
| MGLL1       | 1.43E-05   | -0.4919865 | 0     | 0.125 | 0.0286047  | 14 |
| ID11        | 1.43E-05   | -0.5799257 | 0     | 0.125 | 0.0286047  | 14 |
| CHST15      | 1.49E-05   | 0.42105443 | 0.176 | 1     | 0.02980155 | 14 |
| LILRA51     | 1.52E-05   | -0.2658653 | 0.118 | 0.92  | 0.03045542 | 14 |
| CREG1       | 1.53E-05   | -0.3788261 | 0     | 0.161 | 0.03050662 | 14 |
| CRTAP3      | 1.53E-05   | 0.37017795 | 0.176 | 0.991 | 0.03067034 | 14 |
| ASGR11      | 1.59E-05   | 0.50346401 | 0.176 | 1     | 0.03174539 | 14 |
| HLA-DQB12   | 1.74E-05   | 0.890639   | 0.176 | 1     | 0.03488928 | 14 |
| CCT31       | 1.74E-05   | 0.77750083 | 0.176 | 1     | 0.03488928 | 14 |
| PPT1        | 1.79E-05   | 0.42590792 | 0.176 | 0.991 | 0.03589962 | 14 |
| MSLN1       | 1.80E-05   | 0.89174347 | 0.176 | 1     | 0.03600162 | 14 |
| SLC7A71     | 1.81E-05   | -0.4504228 | 0     | 0.116 | 0.03612395 | 14 |
| TXNDC111    | 2.02E-05   | -0.362921  | 0     | 0.179 | 0.04040672 | 14 |
| MX14        | 2.02E-05   | -0.6359621 | 0     | 0.821 | 0.04040672 | 14 |
| ATP5F1A1    | 2.02E-05   | -0.6709061 | 0     | 0.179 | 0.04040672 | 14 |
| GPBAR1      | 2.23E-05   | 0.82659224 | 0.176 | 0.991 | 0.04466437 | 14 |
| EBNA1BP21   | 2.29E-05   | 0.45067968 | 0.059 | 0.866 | 0.04576156 | 14 |
| CD931       | 2.31E-05   | 0.49509797 | 0.176 | 0.991 | 0.04619928 | 14 |
| FRMD4B1     | 2.44E-05   | 0.28843709 | 0.118 | 0.902 | 0.04878225 | 14 |
| CLU2        | 2.59E-05   | -0.705096  | 0     | 0.17  | 0.05189198 | 14 |
| HLA-DQA12   | 2.76E-05   | 0.61323501 | 0.176 | 0.982 | 0.0552707  | 14 |
| LTBR        | 3.03E-05   | 0.2959893  | 0.176 | 0.973 | 0.0605955  | 14 |
| CD79A2      | 3.21E-05   | 0.49831171 | 0.059 | 0.723 | 0.06417215 | 14 |
| MTIX2       | 3.31E-05   | -0.3748453 | 0     | 0.161 | 0.06615931 | 14 |
| MYOF        | 3.32E-05   | 0.5030167  | 0.176 | 0.973 | 0.06640552 | 14 |
| CAPG1       | 3.54E-05   | 0.38470603 | 0.176 | 0.973 | 0.07078267 | 14 |
| SNRPD32     | 3.77E-05   | 0.46002814 | 0.176 | 0.982 | 0.07540293 | 14 |
| HBEFG       | 4.35E-05   | -0.6154091 | 0     | 0.179 | 0.08708883 | 14 |
| CLEC4A      | 4.74E-05   | -0.4469681 | 0     | 0.661 | 0.09484545 | 14 |
| HERPUD14    | 5.56E-05   | -0.697696  | 0.176 | 0.946 | 0.11128916 | 14 |
| SRP9        | 5.68E-05   | -0.4839272 | 0     | 0.804 | 0.11364839 | 14 |
| ADA         | 6.61E-05   | -0.4602216 | 0.059 | 0.848 | 0.13214046 | 14 |
| RHOB3       | 6.80E-05   | -0.2608765 | 0.059 | 0.848 | 0.13607771 | 14 |
| CHMP1B2     | 7.05E-05   | -0.5358492 | 0     | 0.17  | 0.14096906 | 14 |
| ABRACL3     | 7.47E-05   | 0.36518279 | 0.176 | 0.964 | 0.14934467 | 14 |
| CUX12       | 7.93E-05   | -0.2708225 | 0.235 | 1     | 0.15863797 | 14 |
| ODF3B1      | 8.89E-05   | -0.3011042 | 0.176 | 0.946 | 0.17777378 | 14 |
| PIK3AP11    | 9.34E-05   | -0.392354  | 0     | 0.205 | 0.18680423 | 14 |
| CD1D        | 9.86E-05   | -0.3049058 | 0.059 | 0.205 | 0.19719726 | 14 |
| GADD45B3    | 9.95E-05   | -0.5388655 | 0.118 | 0.884 | 0.19901898 | 14 |
| CLEC4E      | 0.0001098  | -0.3184957 | 0     | 0.152 | 0.21959421 | 14 |
| APOBEC3A2   | 0.00014126 | -0.8462704 | 0     | 0.161 | 0.28251878 | 14 |
| MTRNR2L81   | 0.00014133 | 0.16877317 | 0.471 | 0.312 | 0.28266784 | 14 |
| MT-CYB1     | 0.0001417  | 0.43025234 | 1     | 0.991 | 0.28339784 | 14 |
| TTC381      | 0.00014539 | -0.3103328 | 0     | 0.554 | 0.29077797 | 14 |
| SNRPG1      | 0.00015149 | -0.3084445 | 0     | 0.786 | 0.30297471 | 14 |
| SPCS3       | 0.00015149 | -0.5519125 | 0     | 0.214 | 0.30297471 | 14 |
| IRF7        | 0.00015149 | -0.7275432 | 0     | 0.214 | 0.30297471 | 14 |
| G0S22       | 0.00015149 | -1.0089415 | 0     | 0.214 | 0.30297471 | 14 |
| PAK1        | 0.00015265 | -0.2502378 | 0.059 | 0.196 | 0.3053019  | 14 |
| PLBD11      | 0.00016418 | -0.6412253 | 0.059 | 0.188 | 0.32836107 | 14 |
| RRBP1       | 0.00017552 | 0.33100296 | 0.176 | 0.25  | 0.35104404 | 14 |
| CDA         | 0.00018872 | 0.28841657 | 0.059 | 0.821 | 0.37744566 | 14 |
| CCR1        | 0.00019033 | 0.37593803 | 0.118 | 0.884 | 0.38066433 | 14 |
| LIMS12      | 0.00019075 | -0.5174427 | 0.176 | 0.92  | 0.3814939  | 14 |
| IFI275      | 0.00019439 | -1.1445462 | 0     | 0.116 | 0.38877802 | 14 |
| METTL7A     | 0.00019875 | 0.53936039 | 0.118 | 0.866 | 0.39750059 | 14 |
| 3-Jun       | 0.00020228 | -0.7126484 | 0.294 | 1     | 0.40455861 | 14 |
| IER32       | 0.00021791 | -0.5856678 | 0.059 | 0.223 | 0.43581977 | 14 |
| CD300E      | 0.00021891 | -0.4698667 | 0.176 | 0.911 | 0.43782227 | 14 |
| KYNU        | 0.00022884 | -0.2864307 | 0.059 | 0.223 | 0.45768086 | 14 |
| HSP90B15    | 0.00024244 | -1.3267773 | 0     | 0.777 | 0.48488233 | 14 |
| HSPA82      | 0.00026543 | 0.35439583 | 0.235 | 1     | 0.53085754 | 14 |
| LGALS31     | 0.00027911 | -0.7135367 | 0.118 | 0.857 | 0.55821173 | 14 |
| EFHD23      | 0.00028607 | -0.7179066 | 0.059 | 0.232 | 0.57213703 | 14 |
| MT-ND4L2    | 0.00028991 | 0.70569951 | 1     | 1     | 0.57982581 | 14 |
| AC015912.31 | 0.00029458 | -0.4088405 | 0.118 | 0.241 | 0.58915627 | 14 |
| HLA-DMA2    | 0.00031204 | 0.54226303 | 0.235 | 1     | 0.62407428 | 14 |
| SGK13       | 0.00031856 | -0.2845998 | 0.059 | 0.241 | 0.63711582 | 14 |
| SVK2        | 0.0003292  | -0.2978737 | 0.235 | 0.964 | 0.65840977 | 14 |
| SPN1        | 0.00034725 | 0.4299972  | 0.235 | 1     | 0.6945069  | 14 |
| CYP27A1     | 0.00038054 | -0.3274875 | 0     | 0.223 | 0.76107774 | 14 |
| DDX39A      | 0.00038288 | -0.9315731 | 0     | 0.232 | 0.76575809 | 14 |
| HIFX4       | 0.00038288 | -1.1388573 | 0     | 0.232 | 0.76575809 | 14 |
| MT-ATP61    | 0.00038882 | 0.49159511 | 1     | 0.973 | 0.77763644 | 14 |
| NAPSA       | 0.00039651 | 0.9172836  | 0.235 | 1     | 0.79301039 | 14 |
| TNFSF102    | 0.00042911 | 1.09284554 | 0.235 | 1     | 0.85822562 | 14 |
| MARCKSL11   | 0.00044959 | 0.55938923 | 0.059 | 0.25  | 0.8991879  | 14 |
| PSMB92      | 0.00045222 | 0.57649281 | 0.235 | 1     | 0.90444833 | 14 |
| ID22        | 0.00050019 | -0.4579394 | 0.118 | 0.25  | 1          | 14 |
| HLA-DPB15   | 0.00050197 | 0.80956322 | 0.235 | 0.991 | 1          | 14 |
| ZFP36L25    | 0.00050268 | -0.33424   | 0.294 | 1     | 1          | 14 |

|             |            |            |       |       |   |    |
|-------------|------------|------------|-------|-------|---|----|
| FCGR3A4     | 0.00051336 | 0.65329964 | 0.235 | 0.982 | 1 | 14 |
| CTSB        | 0.00055588 | -0.2501384 | 0.176 | 0.259 | 1 | 14 |
| IFI44L10    | 0.00057803 | -0.9215039 | 0     | 0.205 | 1 | 14 |
| TRIB1       | 0.00058295 | -0.4061337 | 0.059 | 0.25  | 1 | 14 |
| TXN         | 0.00058907 | -0.4399524 | 0     | 0.223 | 1 | 14 |
| CXCL83      | 0.0005967  | -1.0697408 | 0     | 0.241 | 1 | 14 |
| IFITM23     | 0.00063097 | -0.3187138 | 0.118 | 0.259 | 1 | 14 |
| IDH24       | 0.00067978 | 0.53998494 | 0.059 | 0.259 | 1 | 14 |
| NPC21       | 0.00070897 | 0.26409161 | 0.235 | 0.955 | 1 | 14 |
| GNAI2       | 0.00071524 | -0.2923659 | 0.059 | 0.259 | 1 | 14 |
| FKBP111     | 0.00072914 | -0.3338349 | 0     | 0.732 | 1 | 14 |
| HIF01       | 0.00073471 | -0.352412  | 0     | 0.232 | 1 | 14 |
| NCF11       | 0.00073859 | -0.5714785 | 0.294 | 0.964 | 1 | 14 |
| NR4A24      | 0.00079441 | -0.4827621 | 0.176 | 0.884 | 1 | 14 |
| SULF2       | 0.00081591 | 0.64449371 | 0.235 | 0.973 | 1 | 14 |
| LILRB11     | 0.00083666 | 0.39821945 | 0.235 | 0.964 | 1 | 14 |
| PIPF        | 0.00085602 | -1.1316979 | 0     | 0.188 | 1 | 14 |
| ANPEP       | 0.00089081 | -0.7205058 | 0     | 0.214 | 1 | 14 |
| SYNGR21     | 0.0009005  | -0.5968488 | 0.176 | 0.884 | 1 | 14 |
| BZW2        | 0.00090674 | -0.3780563 | 0     | 0.732 | 1 | 14 |
| CD141       | 0.00092965 | -0.3428085 | 0.059 | 0.241 | 1 | 14 |
| Z93241.14   | 0.00099101 | 0.28232286 | 0.059 | 0.795 | 1 | 14 |
| MAP3K7CL1   | 0.00101586 | 0.38472508 | 0.059 | 0.795 | 1 | 14 |
| CD823       | 0.00112319 | -1.0063419 | 0     | 0.241 | 1 | 14 |
| KCNK6       | 0.0012642  | 0.25180516 | 0.118 | 0.83  | 1 | 14 |
| SOD21       | 0.00128874 | -0.8792917 | 0.059 | 0.25  | 1 | 14 |
| FES1        | 0.00135646 | -0.4765066 | 0.059 | 0.259 | 1 | 14 |
| UBE2J12     | 0.00136258 | -0.2629409 | 0.059 | 0.268 | 1 | 14 |
| TALDO1      | 0.00139298 | -0.9073028 | 0     | 0.259 | 1 | 14 |
| LMNA5       | 0.00139298 | -1.4619418 | 0     | 0.259 | 1 | 14 |
| CD1632      | 0.0016543  | -1.0291502 | 0     | 0.223 | 1 | 14 |
| PSME23      | 0.00165681 | 0.91675678 | 0.176 | 0.893 | 1 | 14 |
| BOP1        | 0.00170382 | -0.3413628 | 0     | 0.259 | 1 | 14 |
| SMIM25      | 0.00175822 | 0.7973762  | 0.235 | 0.946 | 1 | 14 |
| HLA-DPA13   | 0.00191235 | 0.43146348 | 0.235 | 0.946 | 1 | 14 |
| CEBPD       | 0.00203847 | -0.6328022 | 0.059 | 0.268 | 1 | 14 |
| BID1        | 0.00208676 | -0.7761154 | 0     | 0.268 | 1 | 14 |
| MAFF1       | 0.00208676 | -1.0013882 | 0     | 0.268 | 1 | 14 |
| PPBP5       | 0.00218518 | -0.8393736 | 0     | 0.116 | 1 | 14 |
| ISG153      | 0.00218649 | -0.4743308 | 0.059 | 0.768 | 1 | 14 |
| MT2A8       | 0.00221641 | -1.1693759 | 0.118 | 0.277 | 1 | 14 |
| AC020916.11 | 0.00244662 | -0.5088563 | 0     | 0.143 | 1 | 14 |
| ABCA1       | 0.00252339 | -0.6346704 | 0     | 0.259 | 1 | 14 |
| CPPED11     | 0.00270508 | 0.48494484 | 0.176 | 0.875 | 1 | 14 |
| CCT21       | 0.0027676  | 0.47154152 | 0.176 | 0.875 | 1 | 14 |
| ADA21       | 0.0029668  | 0.4576643  | 0.235 | 0.938 | 1 | 14 |
| FGL2        | 0.00296994 | 0.56942344 | 0.294 | 1     | 1 | 14 |
| MEF2C2      | 0.0032435  | 0.69231716 | 0.176 | 0.875 | 1 | 14 |
| NAGK        | 0.0032508  | 0.49909064 | 0.294 | 1     | 1 | 14 |
| BHLHE402    | 0.00338249 | -0.4426109 | 0.059 | 0.295 | 1 | 14 |
| SMIM14      | 0.00368871 | 0.47526289 | 0.059 | 0.259 | 1 | 14 |
| STX111      | 0.00370317 | -0.3380349 | 0.059 | 0.259 | 1 | 14 |
| CASP12      | 0.00415237 | 0.48002075 | 0.294 | 0.991 | 1 | 14 |
| CPVL1       | 0.00423001 | 0.3284015  | 0.176 | 0.857 | 1 | 14 |
| MS4A7       | 0.00433456 | 0.57048972 | 0.235 | 0.92  | 1 | 14 |
| DUSP22      | 0.00450298 | -1.1780639 | 0     | 0.714 | 1 | 14 |
| CYBB        | 0.00494855 | -0.5131684 | 0.353 | 0.982 | 1 | 14 |
| PHACTR12    | 0.00584382 | -0.6576999 | 0.059 | 0.304 | 1 | 14 |
| MTHFD21     | 0.00603334 | 0.37154678 | 0.118 | 0.795 | 1 | 14 |
| EPSTI14     | 0.00648706 | -0.4217284 | 0     | 0.295 | 1 | 14 |
| HMGAI2      | 0.00648706 | -0.4887851 | 0     | 0.295 | 1 | 14 |
| IRAK3       | 0.00649725 | -0.2932202 | 0.059 | 0.312 | 1 | 14 |
| TNF6        | 0.00677663 | -0.3143551 | 0     | 0.134 | 1 | 14 |
| CDH23       | 0.00695119 | 0.76395697 | 0.294 | 0.991 | 1 | 14 |
| PIHF19      | 0.00786973 | -0.2634924 | 0     | 0.179 | 1 | 14 |
| HRH2        | 0.00820662 | 0.28975539 | 0.294 | 0.955 | 1 | 14 |
| RNF1301     | 0.00833794 | -0.4469959 | 0.059 | 0.696 | 1 | 14 |
| AC023157.3  | 0.00836094 | -0.2902924 | 0     | 0.42  | 1 | 14 |
| P2RY131     | 0.00960993 | -0.4163221 | 0     | 0.438 | 1 | 14 |
| COTL12      | 0.01112555 | 0.53055639 | 0.353 | 0.438 | 1 | 14 |
| IL1B1       | 0.01182752 | -1.6595556 | 0     | 0.214 | 1 | 14 |
| NFKBIA3     | 0.01298457 | -0.9106765 | 0.118 | 0.75  | 1 | 14 |
| CTSA2       | 0.01301789 | -0.7665108 | 0.059 | 0.286 | 1 | 14 |
| FOSB4       | 0.01381201 | -0.3207195 | 0.353 | 0.973 | 1 | 14 |
| TIMP13      | 0.01403685 | -0.4308839 | 0.118 | 0.348 | 1 | 14 |
| VNN3        | 0.01419876 | -0.3274569 | 0     | 0.375 | 1 | 14 |
| S100A62     | 0.01435776 | -0.5517569 | 0.353 | 0.911 | 1 | 14 |
| MT-ATP83    | 0.01645309 | 0.61523027 | 0.824 | 0.839 | 1 | 14 |
| AHRI        | 0.01700331 | -0.3216502 | 0.118 | 0.357 | 1 | 14 |
| HSPA56      | 0.01795332 | -1.4577225 | 0     | 0.321 | 1 | 14 |
| MAFB        | 0.01835309 | -0.5193791 | 0.176 | 0.357 | 1 | 14 |
| SOX43       | 0.01836794 | 0.58402698 | 0.235 | 0.875 | 1 | 14 |
| HMGBI1      | 0.01873933 | -0.3547072 | 0.353 | 0.911 | 1 | 14 |
| IFI64       | 0.01896745 | -0.6312558 | 0.059 | 0.705 | 1 | 14 |
| EREG2       | 0.02094408 | -1.3880628 | 0     | 0.312 | 1 | 14 |
| GRN         | 0.0230847  | -0.4312127 | 0.176 | 0.75  | 1 | 14 |
| TKT1        | 0.02374644 | -0.4012909 | 0.118 | 0.357 | 1 | 14 |
| ICAM11      | 0.02457133 | -1.3286754 | 0     | 0.33  | 1 | 14 |
| CSF1R       | 0.02469109 | 0.4879442  | 0.353 | 1     | 1 | 14 |
| DMXL21      | 0.02469109 | 0.4395068  | 0.353 | 0.446 | 1 | 14 |
| IFITM35     | 0.02552693 | -1.3148726 | 0.118 | 0.348 | 1 | 14 |
| TNFAIP2     | 0.02902831 | 0.57340844 | 0.529 | 0.616 | 1 | 14 |
| THBS1       | 0.03266826 | -0.7058949 | 0.059 | 0.357 | 1 | 14 |
| SH3BGR1.32  | 0.03278043 | -0.6502862 | 0.353 | 0.902 | 1 | 14 |
| NCL2        | 0.03320688 | -0.871463  | 0     | 0.339 | 1 | 14 |
| AC007952.43 | 0.03881949 | -0.2990774 | 0.118 | 0.732 | 1 | 14 |
| ANXA5       | 0.03951106 | -0.3911107 | 0.176 | 0.384 | 1 | 14 |
| TMSB4X      | 0.03962707 | -0.8836747 | 0.647 | 1     | 1 | 14 |

|              |            |            |       |       |   |    |
|--------------|------------|------------|-------|-------|---|----|
| PRKCD1       | 0.04086572 | 0.3023841  | 0.176 | 0.786 | 1 | 14 |
| TUBA1B2      | 0.04162472 | 1.01569972 | 0.353 | 0.991 | 1 | 14 |
| MT-ND62      | 0.0431011  | 0.77880548 | 0.765 | 0.991 | 1 | 14 |
| PMAIP14      | 0.04431809 | -0.3824969 | 0     | 0.652 | 1 | 14 |
| S100A102     | 0.04431809 | -1.1297784 | 0     | 0.348 | 1 | 14 |
| NEAT15       | 0.04759983 | 0.25409399 | 1     | 0.991 | 1 | 14 |
| GSN3         | 0.04900602 | 0.37035259 | 0.118 | 0.732 | 1 | 14 |
| CTSL         | 0.0491031  | -0.6100779 | 0     | 0.42  | 1 | 14 |
| RXRA1        | 0.05069333 | 0.34173668 | 0.235 | 0.83  | 1 | 14 |
| ACSL11       | 0.05091012 | -1.2516294 | 0     | 0.348 | 1 | 14 |
| HPRT11       | 0.05106366 | 0.37332593 | 0.059 | 0.661 | 1 | 14 |
| NAAA3        | 0.05152271 | 0.54312203 | 0.235 | 0.446 | 1 | 14 |
| RASSF41      | 0.05326352 | 0.75064076 | 0.353 | 0.973 | 1 | 14 |
| MAP3K83      | 0.05397298 | -0.8625369 | 0.059 | 0.366 | 1 | 14 |
| IGSF61       | 0.05410549 | 0.82736607 | 0.294 | 0.902 | 1 | 14 |
| TOB13        | 0.05841554 | -0.2586442 | 0     | 0.643 | 1 | 14 |
| YWHAH        | 0.05841554 | -0.4879786 | 0     | 0.357 | 1 | 14 |
| LAP3         | 0.05929495 | -0.2507592 | 0.059 | 0.67  | 1 | 14 |
| AHNAK4       | 0.05962024 | -0.5744645 | 0.588 | 1     | 1 | 14 |
| MTRNR2L123   | 0.06351161 | 0.28750076 | 1     | 1     | 1 | 14 |
| PLXNB21      | 0.07401608 | 0.53811234 | 0.353 | 0.938 | 1 | 14 |
| CALHM61      | 0.07490689 | 0.51941615 | 0.059 | 0.67  | 1 | 14 |
| F5           | 0.07518445 | -0.4545271 | 0     | 0.464 | 1 | 14 |
| CD68         | 0.08023359 | 0.31382881 | 0.118 | 0.705 | 1 | 14 |
| JAML2        | 0.08597501 | 0.29079603 | 0.294 | 0.857 | 1 | 14 |
| CD834        | 0.09106468 | -0.4170254 | 0.118 | 0.696 | 1 | 14 |
| IFNGR21      | 0.09228933 | -1.0191608 | 0.059 | 0.375 | 1 | 14 |
| BCAT1        | 0.09468271 | 0.26975196 | 0.059 | 0.643 | 1 | 14 |
| PTGER21      | 0.09781095 | -0.8060507 | 0     | 0.625 | 1 | 14 |
| HLA-DR3A3    | 0.10243554 | 0.89424822 | 0.412 | 1     | 1 | 14 |
| CD721        | 0.10270108 | -0.2571703 | 0     | 0.25  | 1 | 14 |
| OASL4        | 0.10371985 | -0.4669916 | 0     | 0.259 | 1 | 14 |
| ZNF385A      | 0.10858206 | -0.5549733 | 0     | 0.321 | 1 | 14 |
| PHLDA1       | 0.1096791  | -0.5133816 | 0     | 0.589 | 1 | 14 |
| SLC8A1       | 0.11300062 | 0.27262625 | 0.235 | 0.473 | 1 | 14 |
| FCER1G2      | 0.11310088 | 0.89039324 | 0.412 | 0.991 | 1 | 14 |
| ANXA13       | 0.11459255 | -0.2750946 | 0.235 | 0.75  | 1 | 14 |
| POU2F21      | 0.11469348 | 0.627106   | 0.412 | 1     | 1 | 14 |
| DDIT43       | 0.11766691 | -0.8638579 | 0.059 | 0.652 | 1 | 14 |
| CYP1B11      | 0.12816046 | -0.5274022 | 0.059 | 0.598 | 1 | 14 |
| PGRMC11      | 0.13170125 | -0.4094559 | 0     | 0.188 | 1 | 14 |
| ACTB5        | 0.1334873  | -0.531221  | 0.882 | 1     | 1 | 14 |
| PSAP         | 0.13528046 | 0.39103266 | 0.647 | 0.688 | 1 | 14 |
| ANKRD282     | 0.14047109 | -0.5314129 | 0.059 | 0.643 | 1 | 14 |
| TIPARP4      | 0.15408413 | -0.6587767 | 0.059 | 0.411 | 1 | 14 |
| FOS6         | 0.15447378 | -0.4605246 | 0.824 | 0.946 | 1 | 14 |
| HLA-DRB52    | 0.17115227 | 1.22030959 | 0.412 | 1     | 1 | 14 |
| ETS21        | 0.17310358 | -0.2900283 | 0.118 | 0.67  | 1 | 14 |
| GLUL2        | 0.17316674 | -0.4882285 | 0.176 | 0.446 | 1 | 14 |
| KLF102       | 0.17395864 | -1.0907889 | 0     | 0.393 | 1 | 14 |
| PGD2         | 0.18435739 | -0.6647041 | 0.118 | 0.429 | 1 | 14 |
| NLRP31       | 0.19626657 | -0.397121  | 0.235 | 0.732 | 1 | 14 |
| TAGLN24      | 0.21362644 | -0.320183  | 0.176 | 0.696 | 1 | 14 |
| TCF7L2       | 0.22688508 | 0.50727468 | 0.353 | 0.875 | 1 | 14 |
| PLEC2        | 0.23228565 | -0.6530227 | 0.353 | 0.768 | 1 | 14 |
| ATF33        | 0.25884659 | -0.9498051 | 0.059 | 0.384 | 1 | 14 |
| LYZ4         | 0.2697399  | -0.477862  | 0.647 | 1     | 1 | 14 |
| GAPDH2       | 0.28179126 | -0.8630861 | 0.235 | 0.661 | 1 | 14 |
| HDAC1        | 0.28694507 | -0.2944756 | 0     | 0.393 | 1 | 14 |
| SRPRB        | 0.31396703 | 0.66637705 | 0.059 | 0.393 | 1 | 14 |
| HDAC9        | 0.32365    | -0.3112803 | 0     | 0.25  | 1 | 14 |
| MYADM3       | 0.33791171 | -0.7990667 | 0.176 | 0.643 | 1 | 14 |
| SIGLEC11     | 0.34151359 | -1.0991934 | 0     | 0.152 | 1 | 14 |
| RBM47        | 0.34158887 | -0.4669752 | 0.176 | 0.661 | 1 | 14 |
| S100A44      | 0.34181507 | 0.50421806 | 0.471 | 0.929 | 1 | 14 |
| ACTG13       | 0.34533298 | 0.45770524 | 0.412 | 0.884 | 1 | 14 |
| NR4A11       | 0.3819055  | 0.25811261 | 0.176 | 0.518 | 1 | 14 |
| P4HB         | 0.39331868 | -0.632599  | 0.118 | 0.473 | 1 | 14 |
| AP2S12       | 0.40604453 | -0.6747744 | 0     | 0.5   | 1 | 14 |
| FPR2         | 0.40931911 | -0.3593501 | 0     | 0.152 | 1 | 14 |
| LILRA1       | 0.4369178  | -0.4706515 | 0.059 | 0.58  | 1 | 14 |
| CST32        | 0.4457504  | 0.27766785 | 0.529 | 0.982 | 1 | 14 |
| FPR11        | 0.45121752 | 0.25328561 | 0.118 | 0.607 | 1 | 14 |
| RPS27L2      | 0.45380285 | 0.3186488  | 0.118 | 0.5   | 1 | 14 |
| BEX3         | 0.45738369 | -0.3825023 | 0     | 0.259 | 1 | 14 |
| TUBB2        | 0.47070144 | 0.41763849 | 0.059 | 0.473 | 1 | 14 |
| TNFAIP35     | 0.49247625 | -1.3000159 | 0.118 | 0.58  | 1 | 14 |
| LRRC25       | 0.52834347 | 0.38520817 | 0.176 | 0.661 | 1 | 14 |
| LINC00937    | 0.56523092 | -0.5392804 | 0.059 | 0.473 | 1 | 14 |
| SCIMP        | 0.58670491 | 0.45625003 | 0.118 | 0.607 | 1 | 14 |
| EGR14        | 0.59392072 | -0.530146  | 0.059 | 0.571 | 1 | 14 |
| ADGRE21      | 0.60366527 | -0.451385  | 0.118 | 0.598 | 1 | 14 |
| CLEC12A1     | 0.60863129 | 0.29255176 | 0.235 | 0.58  | 1 | 14 |
| SNX31        | 0.61312975 | -0.3019441 | 0.059 | 0.554 | 1 | 14 |
| APLP2        | 0.61351543 | -0.3266478 | 0.235 | 0.554 | 1 | 14 |
| MIR4435-2HG2 | 0.6378255  | -0.5242305 | 0     | 0.527 | 1 | 14 |
| NKG75        | 0.63809859 | 0.92905574 | 0.118 | 0.607 | 1 | 14 |
| ZNF503       | 0.66249143 | -0.5135308 | 0     | 0.143 | 1 | 14 |
| PDIA61       | 0.68080554 | -0.3284491 | 0     | 0.464 | 1 | 14 |
| LILRB2       | 0.69399025 | 0.45781941 | 0.529 | 1     | 1 | 14 |
| TMSB102      | 0.71469453 | -0.4316542 | 0.706 | 0.991 | 1 | 14 |
| CTSD1        | 0.71969499 | -0.2676269 | 0.118 | 0.527 | 1 | 14 |
| CALM22       | 0.72482    | -0.5923549 | 0     | 0.527 | 1 | 14 |
| ATP2B1-AS15  | 0.73018518 | -0.7162213 | 0.176 | 0.536 | 1 | 14 |
| JUND4        | 0.73534932 | -1.0779062 | 0.059 | 0.545 | 1 | 14 |
| CSF3R1       | 0.73548974 | -0.4837588 | 0.294 | 0.652 | 1 | 14 |
| LTA4H2       | 0.75129274 | 0.39080494 | 0.294 | 0.643 | 1 | 14 |
| ALOX5AP2     | 0.81535679 | -0.3319171 | 0     | 0.518 | 1 | 14 |

|             |            |            |       |       |            |    |
|-------------|------------|------------|-------|-------|------------|----|
| HLA-DRB16   | 0.84813962 | 0.49828974 | 0.588 | 1     | 1          | 14 |
| TNFAIP6     | 0.87956107 | -0.6107692 | 0     | 0.152 | 1          | 14 |
| BRI3        | 0.91947269 | -0.2518998 | 0.059 | 0.527 | 1          | 14 |
| LYST3       | 0.92509341 | 0.88294783 | 0.412 | 0.821 | 1          | 14 |
| GNG11       | 0.93924956 | -0.3741494 | 0     | 0.125 | 1          | 14 |
| PLEK3       | 0.94166349 | -1.2434963 | 0.059 | 0.527 | 1          | 14 |
| CTSS2       | 0.94724877 | 0.34466466 | 0.412 | 0.741 | 1          | 14 |
| NAIP1       | 0.95277554 | -0.358598  | 0.176 | 0.58  | 1          | 14 |
| S100A92     | 0.96389028 | -0.3437405 | 0.353 | 0.634 | 1          | 14 |
| DDAH2       | 1          | -0.3699476 | 0.059 | 0.482 | 1          | 14 |
| TTN         | 5.66E-13   | -0.6765924 | 0.018 | 1     | 1.13E-09   | 15 |
| TRIB11      | 3.22E-11   | -0.2667801 | 0.036 | 1     | 6.44E-08   | 15 |
| CTSW6       | 4.77E-10   | 0.44128432 | 0.109 | 0     | 9.54E-07   | 15 |
| CSF1R1      | 7.18E-10   | -0.2757108 | 0.055 | 1     | 1.44E-06   | 15 |
| FCN1        | 1.06E-09   | 0.41823002 | 0.055 | 1     | 2.12E-06   | 15 |
| DUSP4       | 4.36E-09   | -0.3859431 | 0     | 0.125 | 8.72E-06   | 15 |
| RHOC4       | 6.72E-09   | 0.29058323 | 0.164 | 0     | 1.34E-05   | 15 |
| CCL55       | 1.62E-08   | 0.47875394 | 0.073 | 1     | 3.24E-05   | 15 |
| P2RY11      | 2.40E-08   | -0.4419165 | 0.018 | 0.125 | 4.80E-05   | 15 |
| IGKV3-151   | 9.15E-08   | 0.66173951 | 0.018 | 0.875 | 0.00018307 | 15 |
| IGLV1-441   | 9.15E-08   | 0.26139683 | 0.018 | 0.875 | 0.00018307 | 15 |
| ASAP11      | 9.39E-08   | -0.4352105 | 0.036 | 0.125 | 0.00018779 | 15 |
| IL7R7       | 1.61E-07   | 0.34069287 | 0.091 | 1     | 0.00032222 | 15 |
| LGALS32     | 1.61E-07   | 0.25887952 | 0.091 | 1     | 0.00032222 | 15 |
| LINC01480   | 2.86E-07   | -0.3990359 | 0.055 | 0.125 | 0.00057173 | 15 |
| SAE1        | 4.78E-07   | -0.4040887 | 0.109 | 1     | 0.00095503 | 15 |
| KLRB15      | 1.14E-06   | 0.26795459 | 0.109 | 1     | 0.00228992 | 15 |
| GPLY7       | 1.52E-06   | 1.16720549 | 0.109 | 0.125 | 0.00304594 | 15 |
| HRH21       | 3.07E-06   | -0.3453034 | 0.109 | 0.125 | 0.00613155 | 15 |
| ATP2B1-AS16 | 3.22E-06   | 0.28694126 | 0.145 | 0.125 | 0.00644121 | 15 |
| CHST151     | 6.21E-06   | 0.35882411 | 0.127 | 1     | 0.01241907 | 15 |
| ANXA14      | 7.05E-06   | 0.36837019 | 0.182 | 0.125 | 0.01409592 | 15 |
| CD693       | 8.98E-06   | -0.2797827 | 0.145 | 0.125 | 0.01796806 | 15 |
| NKG76       | 9.17E-06   | 0.9928963  | 0.2   | 0.125 | 0.01833115 | 15 |
| GNG111      | 1.02E-05   | -0.3242056 | 0.145 | 1     | 0.02036217 | 15 |
| SLC29A1     | 1.09E-05   | 0.29021023 | 0.164 | 0.125 | 0.02187259 | 15 |
| GUCY1A11    | 1.39E-05   | -0.7311731 | 0.164 | 0.125 | 0.0278608  | 15 |
| KYNU1       | 1.46E-05   | 0.35408931 | 0.2   | 0.125 | 0.02924593 | 15 |
| CTS2D       | 2.19E-05   | 0.25115455 | 0.236 | 0.125 | 0.04379119 | 15 |
| LYZ5        | 2.70E-05   | 1.30264833 | 0.145 | 1     | 0.05401118 | 15 |
| AC004817.3  | 9.33E-05   | -0.4357179 | 0     | 0.25  | 0.18667723 | 15 |
| ID12        | 9.33E-05   | -0.4625023 | 0     | 0.25  | 0.18667723 | 15 |
| MZT11       | 0.00012058 | -0.316967  | 0.182 | 1     | 0.24116496 | 15 |
| AC020916.12 | 0.00017795 | -0.3524206 | 0.018 | 0.25  | 0.35590512 | 15 |
| CPVL2       | 0.00030395 | 0.31318898 | 0.182 | 1     | 0.60789472 | 15 |
| IGFBP3      | 0.00030395 | 0.3066255  | 0.182 | 1     | 0.60789472 | 15 |
| DDX39A1     | 0.00053521 | -0.3623995 | 0.291 | 1     | 1          | 15 |
| ATF34       | 0.00063434 | -0.4958801 | 0.055 | 0.25  | 1          | 15 |
| MIR22HG2    | 0.00078245 | -0.4198065 | 0.073 | 0.25  | 1          | 15 |
| IL329       | 0.00082917 | 0.75737793 | 0.2   | 1     | 1          | 15 |
| ANXA51      | 0.00082917 | 0.26358955 | 0.2   | 1     | 1          | 15 |
| FH          | 0.00082917 | 0.25478265 | 0.2   | 1     | 1          | 15 |
| THBD1       | 0.00097141 | -0.4105582 | 0.073 | 0.25  | 1          | 15 |
| SWAP701     | 0.00097141 | -0.4654946 | 0.073 | 0.25  | 1          | 15 |
| TOX2        | 0.00102439 | -0.4230676 | 0.091 | 0.25  | 1          | 15 |
| AIF13       | 0.00102842 | 0.47452216 | 0.309 | 0.25  | 1          | 15 |
| PLXNB22     | 0.00123127 | 0.42490741 | 0.364 | 0.25  | 1          | 15 |
| ANXA63      | 0.00199066 | 0.33437013 | 0.382 | 0.25  | 1          | 15 |
| COTL13      | 0.00201426 | 0.31688442 | 0.236 | 0.25  | 1          | 15 |
| HIST1H2AC1  | 0.00202318 | 0.25689694 | 0.218 | 1     | 1          | 15 |
| LMNB1       | 0.00215364 | -0.4147738 | 0.182 | 0.25  | 1          | 15 |
| SOD22       | 0.0031197  | -0.4600844 | 0.145 | 0.25  | 1          | 15 |
| SERPINF2    | 0.00321137 | -0.278211  | 0.255 | 1     | 1          | 15 |
| CKS1B       | 0.00448237 | 0.28711056 | 0.236 | 1     | 1          | 15 |
| CD320       | 0.00448237 | 0.25620522 | 0.236 | 1     | 1          | 15 |
| MGST21      | 0.00489456 | 0.27569992 | 0.473 | 0.25  | 1          | 15 |
| MYADM4      | 0.00771221 | -0.4092788 | 0.382 | 1     | 1          | 15 |
| AL138963.39 | 0.00901262 | 1.28511508 | 0.545 | 0.375 | 1          | 15 |
| F13A1       | 0.00912852 | 0.34167948 | 0.255 | 1     | 1          | 15 |
| CARD161     | 0.00912852 | 0.33250558 | 0.255 | 1     | 1          | 15 |
| RNF144B     | 0.00912852 | 0.2861171  | 0.255 | 1     | 1          | 15 |
| S100A93     | 0.01000429 | 0.83208886 | 0.073 | 0.75  | 1          | 15 |
| LDLRAD4     | 0.01025208 | -0.3393814 | 0.109 | 0.75  | 1          | 15 |
| RPLP02      | 0.0107893  | -0.3935547 | 0.964 | 1     | 1          | 15 |
| CPNE32      | 0.01159187 | -0.6844456 | 0.455 | 1     | 1          | 15 |
| S100A111    | 0.01663131 | 0.60522436 | 0.764 | 1     | 1          | 15 |
| IFITM36     | 0.01726325 | 0.56285316 | 0.273 | 1     | 1          | 15 |
| SLIRP       | 0.01726325 | 0.48732793 | 0.273 | 1     | 1          | 15 |
| LST1        | 0.01726325 | 0.41764142 | 0.273 | 1     | 1          | 15 |
| ESYT11      | 0.01726325 | 0.33806063 | 0.273 | 1     | 1          | 15 |
| FGD2        | 0.01726325 | 0.32196594 | 0.273 | 1     | 1          | 15 |
| PHACTR13    | 0.02356386 | -0.4948204 | 0.4   | 1     | 1          | 15 |
| ETFA1       | 0.02551723 | 0.27405662 | 0.291 | 0.375 | 1          | 15 |
| GPR1832     | 0.02725176 | -0.7008478 | 0.309 | 0.875 | 1          | 15 |
| TOR3A2      | 0.03028229 | 0.33607099 | 0.436 | 0.375 | 1          | 15 |
| NREP1       | 0.03057372 | 0.42057133 | 0.291 | 1     | 1          | 15 |
| ATPIB3      | 0.03057372 | 0.32417994 | 0.291 | 1     | 1          | 15 |
| SFT11       | 0.03057372 | 0.26693168 | 0.291 | 1     | 1          | 15 |
| GNG7        | 0.03236817 | -0.4076    | 0.509 | 1     | 1          | 15 |
| MS4A6A2     | 0.03409313 | 0.53532854 | 0.836 | 1     | 1          | 15 |
| CANX2       | 0.03764044 | 0.26476972 | 0.818 | 0.625 | 1          | 15 |
| AL355075.4  | 0.03965411 | -0.4616574 | 0.382 | 1     | 1          | 15 |
| FTL1        | 0.03997471 | -0.3028381 | 0.964 | 1     | 1          | 15 |
| UBE2J13     | 0.04322292 | -0.5277587 | 0.764 | 1     | 1          | 15 |
| NEAT16      | 0.04328173 | 0.39000598 | 0.309 | 0.375 | 1          | 15 |
| TSPO1       | 0.04350915 | -0.2543147 | 0.4   | 1     | 1          | 15 |
| HMG1B2      | 0.04636226 | -0.4759885 | 0.964 | 1     | 1          | 15 |
| HLA-DPB16   | 0.04636488 | -0.3138854 | 1     | 1     | 1          | 15 |

|             |            |            |       |       |   |    |
|-------------|------------|------------|-------|-------|---|----|
| IFITM24     | 0.04924486 | 0.25590367 | 0.473 | 0.375 | 1 | 15 |
| CAT         | 0.05062505 | -0.3332569 | 0.818 | 1     | 1 | 15 |
| NOPS62      | 0.05107023 | 0.57117208 | 0.309 | 1     | 1 | 15 |
| MGLL2       | 0.05107023 | 0.3826231  | 0.309 | 1     | 1 | 15 |
| GRASP4      | 0.05180841 | -0.3836845 | 0     | 0.625 | 1 | 15 |
| IFI276      | 0.05180841 | -0.7668543 | 0     | 0.375 | 1 | 15 |
| SEMA7A      | 0.05764678 | -0.3232917 | 0.036 | 0.375 | 1 | 15 |
| S100A85     | 0.05974401 | 1.08734103 | 0.091 | 0.375 | 1 | 15 |
| IGKC1       | 0.061722   | -0.9383938 | 0.945 | 1     | 1 | 15 |
| TIPARP5     | 0.06449133 | -0.4286096 | 0.018 | 0.375 | 1 | 15 |
| TXNDC171    | 0.0688298  | 0.28622847 | 0.345 | 1     | 1 | 15 |
| AHCY        | 0.07029513 | -0.2889712 | 0.382 | 1     | 1 | 15 |
| PSMB81      | 0.07466375 | 0.38261612 | 0.691 | 0.5   | 1 | 15 |
| RNASE61     | 0.0775311  | 0.48074385 | 0.927 | 1     | 1 | 15 |
| EPRS3       | 0.08094697 | 0.51346189 | 0.327 | 1     | 1 | 15 |
| KCTD12      | 0.08094697 | 0.3016606  | 0.327 | 1     | 1 | 15 |
| EAF2        | 0.08094697 | 0.28272156 | 0.327 | 1     | 1 | 15 |
| SEPT113     | 0.08094697 | 0.25867708 | 0.327 | 1     | 1 | 15 |
| CXCR3       | 0.08347614 | -0.5913263 | 0.564 | 1     | 1 | 15 |
| CALHM62     | 0.08612535 | -0.2886238 | 0.109 | 0.375 | 1 | 15 |
| CHMP1B3     | 0.08844741 | -0.5220205 | 0.164 | 0.375 | 1 | 15 |
| PPPIR14A1   | 0.09188287 | -0.3784443 | 0.236 | 0.375 | 1 | 15 |
| SLC25A5     | 0.11357398 | -0.4411299 | 0.818 | 1     | 1 | 15 |
| CCDC88A     | 0.11404796 | -0.3951518 | 0.873 | 1     | 1 | 15 |
| ZFP362      | 0.11783429 | -0.2980108 | 0.782 | 1     | 1 | 15 |
| S100A63     | 0.11901389 | -0.4996231 | 0.909 | 1     | 1 | 15 |
| CSF2RA      | 0.12237324 | 0.6043152  | 0.345 | 1     | 1 | 15 |
| CD77        | 0.12237324 | 0.51420908 | 0.345 | 1     | 1 | 15 |
| JPT12       | 0.12237324 | 0.27904609 | 0.345 | 1     | 1 | 15 |
| SEC61B2     | 0.12406641 | -0.3033404 | 0.964 | 1     | 1 | 15 |
| PSME24      | 0.12494225 | 0.45782063 | 0.582 | 0.625 | 1 | 15 |
| SAT15       | 0.13821539 | -0.3680971 | 0.764 | 1     | 1 | 15 |
| MARCKSL12   | 0.13963004 | -0.3354351 | 0.291 | 0.375 | 1 | 15 |
| H2AFZ2      | 0.1517044  | -0.4407725 | 0.564 | 1     | 1 | 15 |
| HSBP1       | 0.15335885 | 0.37225969 | 0.382 | 1     | 1 | 15 |
| GSN4        | 0.15935145 | 0.64099761 | 0.691 | 1     | 1 | 15 |
| DNASE1L3    | 0.16835765 | 0.37886302 | 0.782 | 1     | 1 | 15 |
| AC245014.33 | 0.17676468 | -0.8931975 | 0.491 | 0.375 | 1 | 15 |
| FABP5       | 0.17715164 | 0.28349276 | 0.4   | 1     | 1 | 15 |
| FKBP3       | 0.17723796 | 0.33844355 | 0.364 | 1     | 1 | 15 |
| NUDT51      | 0.17723796 | 0.27386486 | 0.364 | 1     | 1 | 15 |
| RGS14       | 0.17784173 | -0.8893038 | 0.109 | 0.625 | 1 | 15 |
| CC171       | 0.19605616 | -0.2624388 | 0.473 | 1     | 1 | 15 |
| SMPD3       | 0.19894094 | -0.2854797 | 0.673 | 1     | 1 | 15 |
| ADA22       | 0.20105298 | -0.3105738 | 0.455 | 1     | 1 | 15 |
| PVCARD2     | 0.21049109 | 0.36169295 | 0.8   | 1     | 1 | 15 |
| GZMB3       | 0.21169954 | -0.8805796 | 0.982 | 1     | 1 | 15 |
| SMIM141     | 0.21190319 | 0.56421088 | 0.636 | 1     | 1 | 15 |
| SEC11C1     | 0.22076823 | -0.5803822 | 0.655 | 1     | 1 | 15 |
| HIST1H4C2   | 0.22337726 | -0.4414784 | 0.709 | 1     | 1 | 15 |
| SNX32       | 0.22713783 | -0.2999538 | 0.927 | 1     | 1 | 15 |
| MTRNR2L124  | 0.22719361 | 0.55231403 | 1     | 1     | 1 | 15 |
| FRMD4B2     | 0.22849555 | 0.49484105 | 0.164 | 0     | 1 | 15 |
| SAMHD11     | 0.24316268 | 0.25933905 | 0.873 | 1     | 1 | 15 |
| JCHAIN      | 0.25192327 | -0.3487268 | 1     | 1     | 1 | 15 |
| TNFSF13B1   | 0.2603486  | -0.3855934 | 0.455 | 1     | 1 | 15 |
| DAAM12      | 0.26568872 | -0.4435792 | 0.491 | 1     | 1 | 15 |
| PPT11       | 0.26880593 | 0.30619605 | 0.2   | 0.5   | 1 | 15 |
| ZFP361.26   | 0.27681582 | -0.4434022 | 0.782 | 1     | 1 | 15 |
| FAM129C     | 0.28761265 | 0.34480035 | 0.909 | 1     | 1 | 15 |
| SNRPD33     | 0.28936153 | -0.316114  | 0.636 | 1     | 1 | 15 |
| TCL1A1      | 0.29287692 | 0.78475551 | 0.418 | 1     | 1 | 15 |
| SSRP1       | 0.3031567  | 0.29130739 | 0.418 | 1     | 1 | 15 |
| JUND5       | 0.30920553 | -0.2593255 | 0.527 | 0.75  | 1 | 15 |
| CYB561A31   | 0.3166193  | -0.4932082 | 0.909 | 1     | 1 | 15 |
| DYNLL12     | 0.32112377 | 0.33659846 | 0.673 | 1     | 1 | 15 |
| CD371       | 0.32675869 | 0.31419674 | 0.927 | 1     | 1 | 15 |
| ANXA22      | 0.3318685  | 0.33023389 | 0.4   | 1     | 1 | 15 |
| TALDO11     | 0.33711463 | -0.2758217 | 0.6   | 1     | 1 | 15 |
| RASD1       | 0.34196347 | -0.3518051 | 0.109 | 0.625 | 1 | 15 |
| EIF4A31     | 0.34277595 | -0.4091315 | 0.545 | 0.75  | 1 | 15 |
| CDK2AP2     | 0.34632097 | -0.4710895 | 0.8   | 1     | 1 | 15 |
| CTSC3       | 0.34739482 | 0.28059125 | 0.891 | 1     | 1 | 15 |
| PTMS2       | 0.35878153 | 0.65300975 | 0.6   | 1     | 1 | 15 |
| NCL3        | 0.367932   | 0.25204742 | 0.8   | 0.75  | 1 | 15 |
| IRF41       | 0.38603515 | -0.2841535 | 0.327 | 0.75  | 1 | 15 |
| H2AFY3      | 0.38901562 | 0.30015298 | 0.745 | 1     | 1 | 15 |
| HSP90AB12   | 0.40265529 | -0.2544164 | 0.855 | 0.875 | 1 | 15 |
| APP         | 0.4031243  | 0.39378228 | 1     | 1     | 1 | 15 |
| HSPA83      | 0.41227855 | 0.41838682 | 0.745 | 1     | 1 | 15 |
| TRAF4       | 0.42130189 | -0.4950788 | 0.673 | 1     | 1 | 15 |
| VDAC33      | 0.42502583 | 0.44948511 | 0.455 | 1     | 1 | 15 |
| NAGK1       | 0.42502583 | 0.38808006 | 0.455 | 1     | 1 | 15 |
| SHTN11      | 0.43180565 | 0.63533529 | 0.418 | 1     | 1 | 15 |
| TMEM8B      | 0.43432685 | 0.47825111 | 0.691 | 1     | 1 | 15 |
| GNAI21      | 0.45520847 | 0.32558161 | 0.618 | 1     | 1 | 15 |
| TMEM1091    | 0.46169946 | 0.40766476 | 0.764 | 1     | 1 | 15 |
| PTGDS1      | 0.46493367 | -0.9693578 | 0.382 | 0.5   | 1 | 15 |
| TXN1        | 0.47632848 | 0.39402237 | 0.945 | 1     | 1 | 15 |
| SNRPG2      | 0.48214793 | -0.4225485 | 0.636 | 1     | 1 | 15 |
| NBPF142     | 0.48458902 | -0.2756418 | 0.509 | 0.75  | 1 | 15 |
| FOSB5       | 0.48458902 | -0.3016239 | 0.509 | 0.75  | 1 | 15 |
| 4-Jun       | 0.50185294 | -0.4396809 | 0.855 | 0.875 | 1 | 15 |
| BCL11A1     | 0.50218175 | -0.3074415 | 0.909 | 1     | 1 | 15 |
| HNRNPF1     | 0.52375364 | -0.3206198 | 0.491 | 1     | 1 | 15 |
| ID23        | 0.53479182 | -0.2727554 | 0.164 | 0.625 | 1 | 15 |
| STT3A       | 0.53573609 | 0.35284513 | 0.473 | 1     | 1 | 15 |
| ABRACL4     | 0.53921416 | 0.27593771 | 0.709 | 1     | 1 | 15 |

|             |            |            |       |       |            |    |
|-------------|------------|------------|-------|-------|------------|----|
| FCGRT       | 0.54147451 | 0.32969544 | 0.8   | 1     | 1          | 15 |
| CACYBP2     | 0.54529432 | 0.25376913 | 0.436 | 1     | 1          | 15 |
| NCF12       | 0.55621769 | -0.2715907 | 0.909 | 1     | 1          | 15 |
| S100A103    | 0.55919768 | 0.83718531 | 0.564 | 1     | 1          | 15 |
| TPM41       | 0.57230003 | -0.4925483 | 0.418 | 0.5   | 1          | 15 |
| CTSZ        | 0.59429074 | 0.34404564 | 0.673 | 1     | 1          | 15 |
| MYDGF2      | 0.59429074 | 0.28897961 | 0.673 | 1     | 1          | 15 |
| HSP90B16    | 0.5986115  | -0.2990952 | 0.982 | 0.875 | 1          | 15 |
| FCER1A1     | 0.60145102 | 0.29552356 | 0.545 | 1     | 1          | 15 |
| ICAM12      | 0.60911409 | -0.2749683 | 0.127 | 0.5   | 1          | 15 |
| NDUFB32     | 0.61328637 | -0.4702874 | 0.509 | 1     | 1          | 15 |
| HIST1HIE3   | 0.62279831 | 0.38564958 | 0.655 | 1     | 1          | 15 |
| HLA-DQB13   | 0.6257036  | -0.4518774 | 0.745 | 1     | 1          | 15 |
| LGALS14     | 0.63688051 | 0.3566352  | 0.636 | 1     | 1          | 15 |
| PIK3AP12    | 0.64037728 | -0.4140094 | 0.473 | 0.625 | 1          | 15 |
| C1orf1622   | 0.64216805 | 0.34571529 | 0.491 | 1     | 1          | 15 |
| MT-ATP84    | 0.65398206 | -0.2639366 | 0.691 | 1     | 1          | 15 |
| SPCS31      | 0.66909609 | -0.4011329 | 0.691 | 1     | 1          | 15 |
| PPMIJ       | 0.66997248 | 0.4066516  | 0.455 | 1     | 1          | 15 |
| PDE4B1      | 0.688583   | -0.5270272 | 0.127 | 0.5   | 1          | 15 |
| PLEK4       | 0.70250391 | -0.4269198 | 0.927 | 1     | 1          | 15 |
| AC007952.44 | 0.71697838 | -0.2564798 | 0.782 | 1     | 1          | 15 |
| CYBB1       | 0.71737356 | -0.2919307 | 0.818 | 1     | 1          | 15 |
| SLC1A51     | 0.7277733  | 0.30196108 | 0.6   | 1     | 1          | 15 |
| CD362       | 0.7277733  | -0.2875303 | 0.6   | 1     | 1          | 15 |
| NFKBIA4     | 0.74367337 | -0.5605029 | 0.6   | 0.625 | 1          | 15 |
| TOB14       | 0.74425796 | -0.3298223 | 0.109 | 0.5   | 1          | 15 |
| PLSCR11     | 0.75176593 | -0.4125744 | 0.073 | 0.5   | 1          | 15 |
| AREG4       | 0.75176593 | -0.4782034 | 0.073 | 0.5   | 1          | 15 |
| DAB21       | 0.7589415  | 0.54576957 | 0.582 | 1     | 1          | 15 |
| TLN13       | 0.76199106 | 0.3020921  | 0.673 | 1     | 1          | 15 |
| SLC25A25    | 0.77473507 | -0.291411  | 0.073 | 0.5   | 1          | 15 |
| NPC22       | 0.7804893  | -0.2644412 | 0.982 | 1     | 1          | 15 |
| ALDH21      | 0.80267833 | 0.28233198 | 0.473 | 1     | 1          | 15 |
| RANBP11     | 0.80553164 | 0.3186913  | 0.527 | 1     | 1          | 15 |
| RGS23       | 0.8315203  | -0.9439799 | 0.109 | 0.5   | 1          | 15 |
| HLA-DQA13   | 0.8411561  | 0.28748394 | 0.6   | 1     | 1          | 15 |
| S100A45     | 0.84238129 | 0.66841866 | 0.655 | 0.875 | 1          | 15 |
| SNRNP25     | 0.87344678 | 0.33456637 | 0.564 | 1     | 1          | 15 |
| TUBB3       | 0.87663731 | -0.2841047 | 0.8   | 1     | 1          | 15 |
| GRN1        | 0.87694618 | -0.6322075 | 0.927 | 1     | 1          | 15 |
| NRPI        | 0.88380344 | 0.49205726 | 0.382 | 0.75  | 1          | 15 |
| MIR181A1HG1 | 0.888341   | -0.4346702 | 0.055 | 0.5   | 1          | 15 |
| ISGI54      | 0.888341   | -0.4986275 | 0.055 | 0.5   | 1          | 15 |
| PSMB23      | 0.8893289  | 0.36038274 | 0.527 | 1     | 1          | 15 |
| CCT32       | 0.8915254  | 0.31944812 | 0.636 | 1     | 1          | 15 |
| IFI44L11    | 0.91304155 | -0.450956  | 0.055 | 0.5   | 1          | 15 |
| PECAM12     | 0.93970241 | 0.56826929 | 0.491 | 1     | 1          | 15 |
| CNN22       | 0.93970241 | 0.37954511 | 0.491 | 1     | 1          | 15 |
| LDHA4       | 0.9405199  | 0.45845175 | 0.545 | 1     | 1          | 15 |
| CLEC4C      | 0.94228817 | -0.5717546 | 0.818 | 1     | 1          | 15 |
| SPIB        | 0.95765704 | 0.36385893 | 0.564 | 1     | 1          | 15 |
| PACSIN1     | 0.97489393 | 0.315176   | 0.636 | 1     | 1          | 15 |
| MEF2C3      | 0.9917484  | -0.2753351 | 0.818 | 1     | 1          | 15 |
| IGHV1-21    | 1.22E-11   | -0.2582363 | 0     | 1     | 2.44E-08   | 16 |
| TRBV7-26    | 4.09E-11   | -0.3589265 | 0     | 0.968 | 8.19E-08   | 16 |
| TRBV7-62    | 4.98E-10   | 0.59063516 | 0.038 | 1     | 9.95E-07   | 16 |
| TRBV11-2    | 4.98E-10   | 0.56400703 | 0.038 | 1     | 9.95E-07   | 16 |
| TRAV27      | 4.98E-10   | 0.26443648 | 0.038 | 1     | 9.95E-07   | 16 |
| IGHV3-212   | 1.24E-09   | -0.2502302 | 0     | 0.871 | 2.47E-06   | 16 |
| TRBV4-13    | 4.31E-09   | 0.59772086 | 0.038 | 0.935 | 8.61E-06   | 16 |
| LYZ6        | 1.17E-08   | -0.5659045 | 0.077 | 1     | 2.34E-05   | 16 |
| TRAV12-3    | 1.29E-08   | 0.37214235 | 0.077 | 1     | 2.58E-05   | 16 |
| TRBV283     | 1.42E-08   | 0.32441777 | 0.077 | 1     | 2.84E-05   | 16 |
| IGHV3-331   | 3.25E-08   | 3.05042327 | 0.038 | 0.871 | 6.50E-05   | 16 |
| KLRC12      | 1.86E-07   | -0.4412669 | 0.115 | 1     | 0.00037224 | 16 |
| VCAN        | 2.15E-07   | 0.28571886 | 0.038 | 0.806 | 0.00043097 | 16 |
| TRBV182     | 4.99E-07   | -0.2562635 | 0     | 0.129 | 0.00099816 | 16 |
| TRBV4-25    | 4.99E-07   | -0.5614911 | 0     | 0.129 | 0.00099816 | 16 |
| TRBV5-12    | 6.10E-07   | -0.4648696 | 0.077 | 0.129 | 0.00122011 | 16 |
| TRAV1-21    | 1.31E-06   | -0.2677641 | 0     | 0.129 | 0.00261981 | 16 |
| JCHAIN1     | 1.61E-06   | 2.35380915 | 0.115 | 0.935 | 0.00322501 | 16 |
| ESPL1       | 2.22E-06   | -0.3243525 | 0.115 | 0.903 | 0.00444702 | 16 |
| IGKV1D-391  | 2.94E-06   | 2.40322038 | 0.038 | 0.71  | 0.00588041 | 16 |
| IGKV1-39    | 2.94E-06   | 0.44733973 | 0.038 | 0.71  | 0.00588041 | 16 |
| IGKC2       | 7.35E-06   | 1.48156086 | 0.154 | 0.968 | 0.01469167 | 16 |
| IGHA21      | 7.99E-06   | 0.3760798  | 0.115 | 0.871 | 0.01598229 | 16 |
| IGHV3-66    | 9.89E-06   | 0.73736031 | 0.038 | 0.806 | 0.01978113 | 16 |
| TKTL1       | 1.75E-05   | 0.27993595 | 0.077 | 0.871 | 0.03502009 | 16 |
| RAMPI1      | 1.94E-05   | 0.27536657 | 0.154 | 0.935 | 0.03876885 | 16 |
| MS4A11      | 4.66E-05   | 0.52890886 | 0.077 | 0.871 | 0.09321738 | 16 |
| EOMES1      | 4.74E-05   | 0.37569097 | 0.192 | 1     | 0.09475744 | 16 |
| IGHM        | 5.07E-05   | 1.41404952 | 0.115 | 0.903 | 0.10135707 | 16 |
| CTSZ1       | 7.13E-05   | 0.25420874 | 0.231 | 0.258 | 0.14265781 | 16 |
| TRAV13-13   | 7.59E-05   | -0.423667  | 0     | 0.194 | 0.15177869 | 16 |
| RNASE62     | 0.00019686 | 0.25058269 | 0.192 | 0.968 | 0.39371588 | 16 |
| AQP33       | 0.00027429 | -0.6701986 | 0.308 | 1     | 0.54858784 | 16 |
| MZB1        | 0.00040052 | 0.61967605 | 0.154 | 0.258 | 0.80103497 | 16 |
| S100A94     | 0.00088992 | 0.54661498 | 0.115 | 0.839 | 1          | 16 |
| CD79A3      | 0.00108491 | 0.94835654 | 0.231 | 0.968 | 1          | 16 |
| FADS2       | 0.00118402 | 0.31159047 | 0.231 | 0.935 | 1          | 16 |
| MYL9        | 0.00212099 | -0.2739077 | 0.077 | 0.29  | 1          | 16 |
| XCL24       | 0.00232814 | 0.47657363 | 0.269 | 1     | 1          | 16 |
| KIF20A      | 0.00307437 | -0.276537  | 0.038 | 0.161 | 1          | 16 |
| GZMA5       | 0.00343767 | 0.90405494 | 0.769 | 0.742 | 1          | 16 |
| PLEC3       | 0.00345207 | -0.3802603 | 0.385 | 1     | 1          | 16 |
| IGHA11      | 0.00365688 | 0.49532042 | 0.115 | 0.742 | 1          | 16 |
| HLA-DQA14   | 0.00384236 | 0.39101604 | 0.231 | 0.355 | 1          | 16 |



|              |            |            |       |       |   |    |
|--------------|------------|------------|-------|-------|---|----|
| SYK3         | 0.00384236 | 0.33646878 | 0.231 | 0.935 | 1 | 16 |
| MELK         | 0.00408659 | -0.3100603 | 0.192 | 0.839 | 1 | 16 |
| TRBV7-94     | 0.00454686 | -0.2777446 | 0     | 0.29  | 1 | 16 |
| CCNB1        | 0.00594216 | 0.35823123 | 0.269 | 0.387 | 1 | 16 |
| KIR2DL12     | 0.00608646 | 0.34292469 | 0.192 | 0.839 | 1 | 16 |
| AHNAK5       | 0.00913179 | -0.643648  | 0.692 | 1     | 1 | 16 |
| CS175        | 0.0092224  | 0.90453148 | 0.885 | 0.806 | 1 | 16 |
| EZF7         | 0.00966751 | -0.2940649 | 0.038 | 0.258 | 1 | 16 |
| TRGV93       | 0.01135943 | 0.36903016 | 0.308 | 1     | 1 | 16 |
| AKR1C3       | 0.01278374 | 0.35810994 | 0.308 | 0.968 | 1 | 16 |
| PTGER42      | 0.01308832 | -0.3370877 | 0.231 | 0.355 | 1 | 16 |
| TK1          | 0.01583757 | 0.51947671 | 0.769 | 0.677 | 1 | 16 |
| CD8A2        | 0.01804559 | 0.36560818 | 0.462 | 0.419 | 1 | 16 |
| CCL45        | 0.0205442  | 0.56839669 | 0.462 | 0.484 | 1 | 16 |
| HMGB21       | 0.0224226  | 0.45875274 | 0.923 | 1     | 1 | 16 |
| HLA-DQA22    | 0.02350149 | 0.34079818 | 0.346 | 1     | 1 | 16 |
| LMNA6        | 0.02534776 | -0.2940049 | 0.154 | 0.774 | 1 | 16 |
| ITM2C        | 0.02537287 | 0.38613885 | 0.231 | 0.839 | 1 | 16 |
| GZMH3        | 0.02645879 | 0.585729   | 0.462 | 0.548 | 1 | 16 |
| PRF13        | 0.02646172 | 0.82554712 | 0.846 | 0.935 | 1 | 16 |
| NDUF63       | 0.0286546  | 0.31551654 | 0.769 | 0.806 | 1 | 16 |
| HLA-DQB14    | 0.02975799 | 0.2545868  | 0.308 | 0.419 | 1 | 16 |
| CDC25B1      | 0.03477534 | -0.3452943 | 0.654 | 1     | 1 | 16 |
| BLVRB1       | 0.03501549 | 0.36728213 | 0.308 | 0.935 | 1 | 16 |
| TTK          | 0.03513599 | -0.3424101 | 0.077 | 0.355 | 1 | 16 |
| LIMS13       | 0.03731973 | -0.2785509 | 0.577 | 1     | 1 | 16 |
| LINC024462   | 0.0375159  | 0.40166269 | 0.115 | 0.742 | 1 | 16 |
| GABARAP1     | 0.03799144 | 0.25144637 | 0.885 | 1     | 1 | 16 |
| CLIC33       | 0.03842165 | 0.90953427 | 0.346 | 1     | 1 | 16 |
| CTSD3        | 0.03886085 | -0.3769321 | 0.385 | 0.935 | 1 | 16 |
| TYMS         | 0.04107202 | 0.50022914 | 0.923 | 0.839 | 1 | 16 |
| SNRPD34      | 0.04606106 | 0.29993297 | 0.885 | 0.903 | 1 | 16 |
| PLEK5        | 0.04772539 | 0.39287275 | 0.769 | 0.774 | 1 | 16 |
| LDHA5        | 0.05352655 | 0.28749494 | 0.923 | 0.935 | 1 | 16 |
| CD21         | 0.05467405 | -0.3626543 | 0.577 | 0.968 | 1 | 16 |
| CD3G3        | 0.05487733 | -0.3551861 | 0.385 | 0.839 | 1 | 16 |
| CX3CR12      | 0.05910067 | 0.56379902 | 0.385 | 1     | 1 | 16 |
| SH2D1B       | 0.05933942 | 0.38434385 | 0.346 | 0.935 | 1 | 16 |
| FKBP24       | 0.06399854 | 0.27487706 | 0.731 | 0.774 | 1 | 16 |
| TMEM1092     | 0.06408918 | 0.27517824 | 0.769 | 0.677 | 1 | 16 |
| TUBA1B3      | 0.06658176 | 0.47420146 | 1     | 0.968 | 1 | 16 |
| MCM5         | 0.06883559 | 0.31491252 | 0.769 | 0.806 | 1 | 16 |
| NKG77        | 0.06894808 | 1.15926558 | 0.846 | 0.806 | 1 | 16 |
| DUSP23       | 0.07021487 | -0.3033748 | 0.346 | 0.452 | 1 | 16 |
| RHOC5        | 0.08088559 | 0.40712983 | 0.346 | 0.935 | 1 | 16 |
| PDLIM11      | 0.08296182 | 0.44964975 | 0.308 | 0.516 | 1 | 16 |
| CD300A1      | 0.08374956 | 0.54730954 | 0.346 | 0.968 | 1 | 16 |
| DUTI         | 0.08500889 | 0.35449937 | 0.962 | 0.806 | 1 | 16 |
| GSTP12       | 0.08794981 | 0.29511178 | 0.962 | 0.968 | 1 | 16 |
| HIST1H1C4    | 0.09053224 | 0.45884595 | 0.692 | 0.742 | 1 | 16 |
| HIST1H1D3    | 0.09362988 | -0.321743  | 0.692 | 0.935 | 1 | 16 |
| SLBP2        | 0.10043288 | 0.34218137 | 0.808 | 0.806 | 1 | 16 |
| LAT21        | 0.1034774  | 0.29200867 | 0.385 | 1     | 1 | 16 |
| STMN12       | 0.10735797 | 0.37118577 | 1     | 0.871 | 1 | 16 |
| TRDC2        | 0.11052865 | 0.6962988  | 0.385 | 1     | 1 | 16 |
| HLA-DPA14    | 0.1128518  | 0.48500989 | 0.538 | 0.645 | 1 | 16 |
| ADGRG13      | 0.11712543 | 0.47227767 | 0.346 | 0.935 | 1 | 16 |
| CTSW7        | 0.11775928 | 0.89663363 | 0.692 | 0.774 | 1 | 16 |
| TPST22       | 0.12186964 | 0.33622589 | 0.769 | 1     | 1 | 16 |
| CD633        | 0.12587564 | 0.43797394 | 0.808 | 0.935 | 1 | 16 |
| MCM71        | 0.13399913 | 0.36146627 | 0.808 | 0.903 | 1 | 16 |
| CD78         | 0.1425223  | 0.54859258 | 0.808 | 1     | 1 | 16 |
| PGAM12       | 0.14704192 | 0.25779973 | 0.885 | 0.903 | 1 | 16 |
| PRDX23       | 0.15597863 | 0.26538947 | 0.769 | 0.806 | 1 | 16 |
| IFITM25      | 0.15618667 | 0.76968124 | 0.885 | 0.935 | 1 | 16 |
| ORC6         | 0.15908191 | -0.2529082 | 0.308 | 0.484 | 1 | 16 |
| MRPS261      | 0.16465067 | 0.33545374 | 0.615 | 0.839 | 1 | 16 |
| H2AFX        | 0.16920379 | 0.38167457 | 0.577 | 0.742 | 1 | 16 |
| EFHD24       | 0.17048891 | 0.36248424 | 0.769 | 0.839 | 1 | 16 |
| GNGT2        | 0.18192368 | 0.25499175 | 0.231 | 0.774 | 1 | 16 |
| CCL56        | 0.18538034 | 0.92367321 | 0.654 | 0.677 | 1 | 16 |
| PCNA         | 0.19102562 | 0.32184682 | 0.692 | 0.71  | 1 | 16 |
| HMG21        | 0.19163076 | 0.27425738 | 1     | 0.935 | 1 | 16 |
| AOAH         | 0.20577222 | 0.37732907 | 0.269 | 0.806 | 1 | 16 |
| KIF4A        | 0.20859359 | 0.25784916 | 0.308 | 0.516 | 1 | 16 |
| AC103591.38  | 0.21227812 | -0.3836379 | 0.038 | 0.419 | 1 | 16 |
| HDAC11       | 0.21432376 | 0.27099977 | 0.885 | 0.935 | 1 | 16 |
| H2AFZ3       | 0.21435347 | 0.28806668 | 0.962 | 1     | 1 | 16 |
| IFNG1        | 0.21891397 | -0.3175307 | 0.154 | 0.452 | 1 | 16 |
| KIF23        | 0.22091379 | -0.2608423 | 0.154 | 0.419 | 1 | 16 |
| NEAT17       | 0.22599547 | -0.2549924 | 0.731 | 0.935 | 1 | 16 |
| KNL1         | 0.23909762 | -0.4398166 | 0.346 | 0.774 | 1 | 16 |
| ANXA15       | 0.24514044 | 0.29062518 | 0.769 | 0.903 | 1 | 16 |
| ASPM         | 0.25329525 | -0.5286993 | 0.192 | 0.452 | 1 | 16 |
| SELENOS1     | 0.25585065 | 0.30208541 | 0.5   | 0.677 | 1 | 16 |
| PNP2         | 0.25824136 | 0.37140725 | 0.731 | 1     | 1 | 16 |
| C1orf1623    | 0.26111759 | 0.49422001 | 0.423 | 1     | 1 | 16 |
| STOM1        | 0.27019674 | 0.33589662 | 0.538 | 0.742 | 1 | 16 |
| MIR4435-2HG3 | 0.27071335 | -0.4535119 | 0.577 | 0.839 | 1 | 16 |
| S100A86      | 0.28272773 | -0.5449696 | 0.077 | 0.452 | 1 | 16 |
| FTL2         | 0.29398367 | 0.29009594 | 1     | 0.968 | 1 | 16 |
| MT-CO11      | 0.30141634 | -0.4213751 | 1     | 1     | 1 | 16 |
| CENPE        | 0.30426888 | -0.3706843 | 0.192 | 0.484 | 1 | 16 |
| SRGN1        | 0.31665404 | 0.28019617 | 1     | 0.935 | 1 | 16 |
| TNFAIP36     | 0.3180908  | -0.7893157 | 0.154 | 0.613 | 1 | 16 |
| CXXC51       | 0.32002786 | 0.50683109 | 0.423 | 1     | 1 | 16 |
| MATK1        | 0.32002786 | 0.40039113 | 0.423 | 0.645 | 1 | 16 |
| HIST1H2BC1   | 0.32404222 | -0.2624977 | 0.115 | 0.452 | 1 | 16 |

|             |            |            |       |       |            |    |
|-------------|------------|------------|-------|-------|------------|----|
| MANF1       | 0.33144653 | 0.31969774 | 0.654 | 0.903 | 1          | 16 |
| TMEM106C1   | 0.34028546 | 0.3865719  | 0.808 | 0.903 | 1          | 16 |
| CTLA4       | 0.34458934 | -0.3622693 | 0.192 | 0.645 | 1          | 16 |
| NCAPG       | 0.34458934 | -0.4656666 | 0.192 | 0.484 | 1          | 16 |
| MTRNR2L82   | 0.34631085 | -0.2563267 | 0.231 | 0.645 | 1          | 16 |
| AC007952.45 | 0.34768021 | 0.25620428 | 0.654 | 0.935 | 1          | 16 |
| SDF2L1      | 0.34796238 | 0.33248483 | 0.692 | 0.806 | 1          | 16 |
| KLRF12      | 0.35251392 | 0.50554771 | 0.423 | 0.968 | 1          | 16 |
| KLRD15      | 0.37261142 | 0.72883873 | 0.615 | 0.968 | 1          | 16 |
| LGALS15     | 0.38255526 | 0.38523089 | 0.923 | 0.968 | 1          | 16 |
| HJURP       | 0.38883757 | -0.6371986 | 0.154 | 0.387 | 1          | 16 |
| MYOM23      | 0.39676587 | 1.1835631  | 0.462 | 1     | 1          | 16 |
| TOR3A3      | 0.39676587 | 0.29338986 | 0.462 | 0.71  | 1          | 16 |
| IFTM37      | 0.40026174 | 0.48859586 | 0.923 | 1     | 1          | 16 |
| MT-ATP62    | 0.40026938 | -0.6665218 | 0.962 | 1     | 1          | 16 |
| LAIR2       | 0.4050086  | 0.32611799 | 0.423 | 0.677 | 1          | 16 |
| MMD1        | 0.41678167 | -0.2825669 | 0.038 | 0.452 | 1          | 16 |
| PP1B4       | 0.42773408 | 0.28105308 | 0.962 | 1     | 1          | 16 |
| FGFBP25     | 0.43292152 | 0.85996533 | 0.423 | 0.935 | 1          | 16 |
| HOPX4       | 0.43589763 | 0.92662547 | 0.615 | 0.968 | 1          | 16 |
| ALOX5AP3    | 0.43589763 | 0.35708705 | 0.615 | 0.871 | 1          | 16 |
| CENPF       | 0.45358992 | -0.6908072 | 0.5   | 0.742 | 1          | 16 |
| ID24        | 0.45505759 | 0.44877065 | 0.615 | 0.839 | 1          | 16 |
| SELL4       | 0.45538787 | -0.3123954 | 0.654 | 0.839 | 1          | 16 |
| IL3210      | 0.4561197  | 0.31488762 | 0.808 | 0.968 | 1          | 16 |
| SUB13       | 0.45626572 | 0.25899567 | 0.962 | 0.968 | 1          | 16 |
| 5-Jun       | 0.45626572 | -0.4835318 | 0.962 | 1     | 1          | 16 |
| TUBB4B3     | 0.47380994 | 0.28963573 | 0.538 | 0.71  | 1          | 16 |
| UBE2S1      | 0.48637232 | -0.5584397 | 0.231 | 0.645 | 1          | 16 |
| CD744       | 0.49592018 | 0.57780758 | 1     | 1     | 1          | 16 |
| TCF19       | 0.52436974 | 0.37850794 | 0.5   | 1     | 1          | 16 |
| MCM32       | 0.52669244 | 0.29843573 | 0.808 | 1     | 1          | 16 |
| MT-CO31     | 0.52682645 | -0.4717737 | 1     | 1     | 1          | 16 |
| PRC11       | 0.53602433 | -0.5922274 | 0.154 | 0.613 | 1          | 16 |
| MT-ATP85    | 0.53731641 | -0.6503004 | 0.885 | 0.935 | 1          | 16 |
| BHLHE403    | 0.54853554 | -0.3688411 | 0.192 | 0.516 | 1          | 16 |
| MT-CYB2     | 0.55868709 | -0.7005904 | 1     | 1     | 1          | 16 |
| JUND6       | 0.56219905 | -0.4201647 | 0.269 | 0.645 | 1          | 16 |
| HLA-DPB17   | 0.56847568 | 0.30351576 | 0.615 | 0.871 | 1          | 16 |
| HIST1H4C3   | 0.60256581 | 0.55042792 | 0.923 | 0.935 | 1          | 16 |
| IL2RB2      | 0.62440607 | 0.69363238 | 0.654 | 0.871 | 1          | 16 |
| TIPARP6     | 0.63105561 | -0.2506713 | 0.308 | 0.548 | 1          | 16 |
| FCER1G3     | 0.63526125 | 0.83103678 | 0.577 | 0.968 | 1          | 16 |
| NCR31       | 0.64427126 | 0.42409086 | 0.385 | 0.806 | 1          | 16 |
| TYROBP2     | 0.64641372 | 0.66327682 | 0.538 | 1     | 1          | 16 |
| GZMB4       | 0.64641372 | 0.53578574 | 0.538 | 0.871 | 1          | 16 |
| FCGR3A5     | 0.66830055 | 1.19556891 | 0.462 | 0.968 | 1          | 16 |
| UNG         | 0.67882608 | 0.50495685 | 0.346 | 0.71  | 1          | 16 |
| IGFBP7      | 0.6795103  | 0.78779911 | 0.462 | 0.935 | 1          | 16 |
| HLA-DRB17   | 0.68108341 | 0.55198381 | 0.5   | 0.774 | 1          | 16 |
| HIST1H2AG1  | 0.71336666 | -0.3014593 | 0.269 | 0.581 | 1          | 16 |
| HIST1H2AL   | 0.72157648 | -0.2513529 | 0.115 | 0.516 | 1          | 16 |
| GPR1833     | 0.73858542 | -0.3221235 | 0.308 | 0.613 | 1          | 16 |
| TBX211      | 0.75330628 | 0.69260044 | 0.5   | 0.903 | 1          | 16 |
| MT-CO21     | 0.76692325 | -0.3994942 | 1     | 1     | 1          | 16 |
| MTRNR2L125  | 0.77918592 | -0.2599034 | 1     | 1     | 1          | 16 |
| KLRB16      | 0.79077386 | 0.30989561 | 0.577 | 1     | 1          | 16 |
| CKAP2L      | 0.82439053 | -0.4987564 | 0.192 | 0.548 | 1          | 16 |
| HLA-DRA4    | 0.82797251 | 0.7486143  | 0.538 | 0.774 | 1          | 16 |
| ZFP36L27    | 0.82875647 | -0.390079  | 0.923 | 1     | 1          | 16 |
| TOP2A       | 0.85274007 | -0.4733349 | 0.462 | 0.645 | 1          | 16 |
| CDC34       | 0.85295746 | 0.28364701 | 0.5   | 0.839 | 1          | 16 |
| HELLS       | 0.85342953 | -0.2502255 | 0.615 | 0.774 | 1          | 16 |
| TRBC14      | 0.85353565 | 0.51177418 | 0.654 | 0.968 | 1          | 16 |
| TTC382      | 0.86561637 | 0.46757601 | 0.5   | 1     | 1          | 16 |
| MT-ND4L3    | 0.86640388 | -0.4725737 | 1     | 1     | 1          | 16 |
| SPN2        | 0.87900475 | -0.2565371 | 0.846 | 1     | 1          | 16 |
| HLA-DRB53   | 0.89046923 | 0.56611711 | 0.385 | 0.742 | 1          | 16 |
| ACOT17      | 0.90307009 | 0.26302869 | 0.346 | 0.71  | 1          | 16 |
| UHRF1       | 0.94160146 | 0.40070015 | 0.385 | 0.742 | 1          | 16 |
| GZMM2       | 0.95516133 | 0.35992719 | 0.615 | 1     | 1          | 16 |
| MT-ND63     | 0.95527835 | -0.4843956 | 0.885 | 0.968 | 1          | 16 |
| ZFP363      | 0.96802082 | -0.6775878 | 0.731 | 0.774 | 1          | 16 |
| CDC45       | 0.99354953 | 0.27310944 | 0.423 | 0.774 | 1          | 16 |
| ABI3        | 0.99359586 | 0.28745422 | 0.654 | 0.968 | 1          | 16 |
| VIM4        | 0.99360791 | 0.25232707 | 0.885 | 1     | 1          | 16 |
| SPON23      | 1          | 0.76249608 | 0.5   | 0.903 | 1          | 16 |
| MYL91       | 1.69E-06   | -0.2541448 | 0     | 1     | 0.00337066 | 19 |
| SEL1L3      | 1.69E-06   | -0.2671732 | 0     | 1     | 0.00337066 | 19 |
| S100A2      | 1.69E-06   | -0.5129619 | 0     | 1     | 0.00337066 | 19 |
| LGALS33     | 1.69E-06   | -0.5730615 | 0     | 1     | 0.00337066 | 19 |
| CTSH        | 1.69E-06   | -0.6537941 | 0     | 1     | 0.00337066 | 19 |
| CPVL3       | 2.81E-05   | -0.2823107 | 0.071 | 1     | 0.05614297 | 19 |
| ANXA23      | 2.81E-05   | -0.4597797 | 0.071 | 1     | 0.05614297 | 19 |
| SRPRB1      | 3.47E-05   | -0.3981942 | 0.071 | 1     | 0.0694159  | 19 |
| LGALS16     | 3.47E-05   | -0.8140738 | 0.071 | 1     | 0.0694159  | 19 |
| IFI277      | 4.12E-05   | -0.9871262 | 0     | 0.929 | 0.08248399 | 19 |
| EPHB61      | 4.28E-05   | 0.66730367 | 0.143 | 0.071 | 0.08556047 | 19 |
| OASL5       | 4.28E-05   | -0.4195988 | 0.071 | 1     | 0.08563461 | 19 |
| ANXA2R1     | 5.07E-05   | 0.34342978 | 0.214 | 0.071 | 0.10138363 | 19 |
| RAB311      | 5.25E-05   | 0.58101456 | 0.143 | 0.071 | 0.10506302 | 19 |
| IGFBP41     | 5.27E-05   | 0.37536593 | 0.071 | 1     | 0.10540647 | 19 |
| MT2A9       | 0.00025104 | -0.6055762 | 0.143 | 1     | 0.50207669 | 19 |
| COTL14      | 0.00025104 | -0.6752917 | 0.143 | 1     | 0.50207669 | 19 |
| GFI1B       | 0.00032172 | 0.48445585 | 0.286 | 0.143 | 0.64344057 | 19 |
| MITCH21     | 0.00036319 | -0.3267779 | 0.143 | 1     | 0.72637975 | 19 |
| MPL         | 0.00038504 | 0.34740174 | 0.286 | 0.143 | 0.77008024 | 19 |
| DAB22       | 0.00043543 | -0.2698773 | 0.143 | 1     | 0.87086458 | 19 |

|             |            |            |       |       |            |    |
|-------------|------------|------------|-------|-------|------------|----|
| BLVRB2      | 0.00043543 | -0.4723511 | 0.143 | 1     | 0.87086458 | 19 |
| TRO         | 0.00044701 | -0.2578689 | 0.071 | 0.929 | 0.89401463 | 19 |
| SIDT2       | 0.00053572 | 0.26411776 | 0.071 | 0.143 | 1          | 19 |
| IL3211      | 0.00064062 | 0.55580188 | 0.071 | 0.929 | 1          | 19 |
| OTOF        | 0.00064272 | -0.2605739 | 0     | 0.143 | 1          | 19 |
| RNASE11     | 0.00064272 | -0.2695344 | 0     | 0.143 | 1          | 19 |
| CD142       | 0.00064272 | -0.3090336 | 0     | 0.143 | 1          | 19 |
| CD1633      | 0.00064272 | -0.3273655 | 0     | 0.143 | 1          | 19 |
| AL355075.41 | 0.00088043 | 0.32505641 | 0.143 | 1     | 1          | 19 |
| IGHG3       | 0.00088043 | 0.27536389 | 0.143 | 1     | 1          | 19 |
| TNFRSF181   | 0.00088043 | 0.2718404  | 0.143 | 1     | 1          | 19 |
| HIP1        | 0.00088043 | 0.25304106 | 0.143 | 1     | 1          | 19 |
| JPT13       | 0.00098749 | -0.2609335 | 0.214 | 1     | 1          | 19 |
| S100A112    | 0.00127753 | -0.8978132 | 0.286 | 1     | 1          | 19 |
| CD3021      | 0.00137234 | 0.45601737 | 0.357 | 0.214 | 1          | 19 |
| HOXA3       | 0.0014514  | 0.74964361 | 0.429 | 0.214 | 1          | 19 |
| CD300A2     | 0.00176638 | 0.60289291 | 0.286 | 0.214 | 1          | 19 |
| ADAM281     | 0.00242213 | 0.45487558 | 0.5   | 0.286 | 1          | 19 |
| CFAP203     | 0.00282772 | 0.39898872 | 0.286 | 0.214 | 1          | 19 |
| S100A104    | 0.00282772 | -0.8633031 | 0.286 | 1     | 1          | 19 |
| EMP1        | 0.00305359 | 0.31152246 | 0.214 | 0.214 | 1          | 19 |
| PDLIM12     | 0.00339421 | -0.4332403 | 0.071 | 0.857 | 1          | 19 |
| FES2        | 0.00355809 | -0.2855803 | 0.214 | 1     | 1          | 19 |
| BRI31       | 0.00355809 | -0.4327776 | 0.214 | 1     | 1          | 19 |
| IFNG-AS11   | 0.00474824 | 0.40290322 | 0.143 | 0.857 | 1          | 19 |
| PDE4B2      | 0.00536416 | 0.60710543 | 0.071 | 0.857 | 1          | 19 |
| FADS21      | 0.0059254  | -0.2564468 | 0.143 | 0.214 | 1          | 19 |
| RASSF6      | 0.00642194 | -0.2870149 | 0     | 0.214 | 1          | 19 |
| CD363       | 0.00642194 | -0.3865698 | 0     | 0.214 | 1          | 19 |
| VCAN1       | 0.00642194 | -0.4196079 | 0     | 0.214 | 1          | 19 |
| CTSD4       | 0.00642194 | -0.5169224 | 0     | 0.214 | 1          | 19 |
| S100A95     | 0.00642194 | -1.6529697 | 0     | 0.214 | 1          | 19 |
| CPA3        | 0.00642416 | -0.2886615 | 0.214 | 0.214 | 1          | 19 |
| IFITM38     | 0.00718945 | -0.5008415 | 0.929 | 0.929 | 1          | 19 |
| S100A87     | 0.00719965 | -1.6656572 | 0.071 | 0.214 | 1          | 19 |
| HIST1H3H    | 0.00852557 | 0.35034456 | 0.214 | 1     | 1          | 19 |
| MARCKS2     | 0.00852557 | 0.29493221 | 0.214 | 1     | 1          | 19 |
| CLEC4A1     | 0.00852557 | 0.28044982 | 0.214 | 1     | 1          | 19 |
| DCTPP11     | 0.0090622  | 0.27028544 | 0.286 | 0.286 | 1          | 19 |
| SLBP3       | 0.00951344 | -0.367545  | 0.357 | 1     | 1          | 19 |
| PPA11       | 0.0189     | -0.555888  | 0.429 | 1     | 1          | 19 |
| MMRN1       | 0.02472082 | 0.40799857 | 0.5   | 0.429 | 1          | 19 |
| PROM1       | 0.03065233 | 0.44648472 | 0.429 | 0.429 | 1          | 19 |
| ATIC1       | 0.0323966  | 0.36914993 | 0.286 | 0.357 | 1          | 19 |
| CST33       | 0.03351846 | -0.716408  | 0.357 | 0.857 | 1          | 19 |
| TUBA1C      | 0.03442381 | -0.3038781 | 0.429 | 1     | 1          | 19 |
| IFI65       | 0.03442381 | -0.3752937 | 0.429 | 0.929 | 1          | 19 |
| CYB561A32   | 0.03639729 | 0.34712532 | 0.286 | 1     | 1          | 19 |
| MT-CO22     | 0.03656219 | -0.2911971 | 1     | 1     | 1          | 19 |
| DST1        | 0.0376085  | -0.2810637 | 0.357 | 1     | 1          | 19 |
| NASP        | 0.0376085  | -0.2853743 | 0.357 | 1     | 1          | 19 |
| HIST1H1B    | 0.04081155 | 0.36771165 | 0.286 | 1     | 1          | 19 |
| SNX101      | 0.04081155 | 0.3576778  | 0.286 | 1     | 1          | 19 |
| JAML3       | 0.04081155 | 0.32583736 | 0.286 | 1     | 1          | 19 |
| ZFP361.28   | 0.04088723 | 0.6137178  | 1     | 1     | 1          | 19 |
| TMSB103     | 0.04088723 | -0.3010624 | 1     | 1     | 1          | 19 |
| MT1X3       | 0.04155713 | -0.3007743 | 0     | 0.286 | 1          | 19 |
| CDKN1A1     | 0.04155713 | -0.3087761 | 0     | 0.286 | 1          | 19 |
| CNRIP1      | 0.04155713 | -0.3153494 | 0     | 0.286 | 1          | 19 |
| TMEM1401    | 0.04195169 | -0.3767319 | 0.143 | 0.286 | 1          | 19 |
| ALDH22      | 0.04316584 | 0.28410182 | 0.429 | 0.429 | 1          | 19 |
| LAG32       | 0.04447923 | -0.2717085 | 0.071 | 0.286 | 1          | 19 |
| PLEC4       | 0.04447923 | -0.4404031 | 0.071 | 0.286 | 1          | 19 |
| TYMP2       | 0.04447923 | -0.6303582 | 0.071 | 0.286 | 1          | 19 |
| PMAIP15     | 0.04701775 | -0.6539459 | 0.143 | 0.786 | 1          | 19 |
| H2AFZ4      | 0.04701775 | -0.514819  | 0.357 | 0.857 | 1          | 19 |
| P4HB1       | 0.04907788 | -0.3245526 | 0.5   | 1     | 1          | 19 |
| NCL4        | 0.05081442 | 0.40957038 | 0.857 | 0.857 | 1          | 19 |
| GAPDH3      | 0.0508461  | -0.3111543 | 1     | 1     | 1          | 19 |
| CCR73       | 0.05100992 | 0.80442973 | 0.286 | 1     | 1          | 19 |
| PRAM11      | 0.05100992 | 0.48920484 | 0.286 | 1     | 1          | 19 |
| HIST1H2BH   | 0.05100992 | 0.43257587 | 0.286 | 1     | 1          | 19 |
| ADGRE22     | 0.05100992 | 0.31645603 | 0.286 | 1     | 1          | 19 |
| FHIT        | 0.05100992 | 0.30369872 | 0.286 | 1     | 1          | 19 |
| TSPO2       | 0.05650897 | -0.3917928 | 0.857 | 1     | 1          | 19 |
| MTRNR2L126  | 0.05654277 | 0.37580178 | 1     | 1     | 1          | 19 |
| CANX3       | 0.0620421  | 0.33800528 | 0.643 | 0.5   | 1          | 19 |
| MT-ATP86    | 0.06261713 | -0.390859  | 0.786 | 1     | 1          | 19 |
| SRP91       | 0.06276098 | 0.33498317 | 0.929 | 1     | 1          | 19 |
| STOML2      | 0.06739919 | -0.26147   | 0.5   | 1     | 1          | 19 |
| HMGB13      | 0.06949598 | 0.52875898 | 0.857 | 0.929 | 1          | 19 |
| PIM22       | 0.07463532 | 0.31173082 | 0.5   | 0.5   | 1          | 19 |
| CTT22       | 0.07608848 | 0.35984098 | 0.643 | 0.571 | 1          | 19 |
| S100A64     | 0.07608848 | -1.0646025 | 0.643 | 0.857 | 1          | 19 |
| CALR3       | 0.07673468 | -0.4342147 | 0.786 | 1     | 1          | 19 |
| FAM30A2     | 0.07689626 | 0.83025359 | 0.929 | 1     | 1          | 19 |
| AC074327.11 | 0.07946385 | 0.42223658 | 0.214 | 0     | 1          | 19 |
| HMGB22      | 0.0910105  | -0.2706749 | 0.5   | 1     | 1          | 19 |
| TLN14       | 0.09307608 | 0.46141535 | 0.714 | 0.571 | 1          | 19 |
| PLEK6       | 0.09506454 | -0.3802936 | 0.286 | 0.857 | 1          | 19 |
| SOC321      | 0.09719544 | -0.3272405 | 0.357 | 0.929 | 1          | 19 |
| NPR3        | 0.10191809 | 0.3644878  | 0.643 | 0.429 | 1          | 19 |
| AKR1C31     | 0.10191809 | 0.2647804  | 0.643 | 0.5   | 1          | 19 |
| EGFL71      | 0.10286022 | 0.41728781 | 1     | 1     | 1          | 19 |
| CTSC4       | 0.10877228 | 0.28405139 | 0.429 | 0.5   | 1          | 19 |
| PTMS3       | 0.11119567 | -0.3016133 | 0.571 | 1     | 1          | 19 |
| SOX44       | 0.11292204 | 0.53918408 | 0.929 | 0.786 | 1          | 19 |
| AP000547.3  | 0.11520486 | 0.29053662 | 0.286 | 0.429 | 1          | 19 |

|              |            |            |       |       |   |    |
|--------------|------------|------------|-------|-------|---|----|
| ISG155       | 0.11520486 | -0.3362658 | 0.286 | 0.857 | 1 | 19 |
| STX112       | 0.11554733 | -0.5888373 | 0.071 | 0.714 | 1 | 19 |
| CYTL1        | 0.11941095 | -0.2762674 | 0.429 | 1     | 1 | 19 |
| GPI2         | 0.12085865 | 0.35193454 | 0.5   | 0.571 | 1 | 19 |
| PA2G43       | 0.12271505 | 0.4253949  | 0.643 | 0.643 | 1 | 19 |
| APPI         | 0.12346498 | -0.2622443 | 0.214 | 0.357 | 1 | 19 |
| PSAP1        | 0.12374394 | -0.410517  | 1     | 1     | 1 | 19 |
| TFPI1        | 0.12890324 | -0.3604748 | 0.357 | 0.857 | 1 | 19 |
| CYTOR2       | 0.13166916 | -0.3899142 | 0.143 | 0.714 | 1 | 19 |
| LYN2         | 0.13428837 | 0.60936796 | 0.643 | 0.714 | 1 | 19 |
| SCHIP1       | 0.14109655 | 0.28360072 | 0.357 | 1     | 1 | 19 |
| PLCB2        | 0.14109655 | 0.27866146 | 0.357 | 1     | 1 | 19 |
| AC103591.39  | 0.14437434 | -0.9563578 | 0.143 | 0.357 | 1 | 19 |
| HIFX5        | 0.14724363 | 0.34422551 | 0.714 | 0.714 | 1 | 19 |
| MT-ATP63     | 0.14779838 | -0.2793071 | 1     | 1     | 1 | 19 |
| GNGH12       | 0.15415762 | 0.45158501 | 0.357 | 1     | 1 | 19 |
| MZB11        | 0.15415762 | 0.3625411  | 0.357 | 1     | 1 | 19 |
| HIST1H2AE1   | 0.15625048 | -0.3184473 | 0.429 | 1     | 1 | 19 |
| FAM19A2      | 0.15799866 | -0.4298235 | 0.143 | 0.714 | 1 | 19 |
| CNN23        | 0.16103591 | 0.31984593 | 0.857 | 1     | 1 | 19 |
| ENO13        | 0.16109322 | 0.35664483 | 1     | 1     | 1 | 19 |
| ABRACL5      | 0.16109322 | 0.27496479 | 0.929 | 1     | 1 | 19 |
| PPIA2        | 0.16109322 | -0.2973431 | 0.929 | 1     | 1 | 19 |
| NAAA4        | 0.16811769 | 0.40538126 | 0.357 | 1     | 1 | 19 |
| STT3A1       | 0.16811769 | 0.33431716 | 0.357 | 1     | 1 | 19 |
| NINJ12       | 0.16811769 | 0.29041492 | 0.357 | 1     | 1 | 19 |
| ASAH1        | 0.17195022 | -0.288391  | 0.5   | 1     | 1 | 19 |
| APL21        | 0.17319939 | -0.3393022 | 0.571 | 1     | 1 | 19 |
| SLC9A3R14    | 0.17503584 | 0.39311328 | 0.786 | 1     | 1 | 19 |
| Z93241.15    | 0.18300612 | 0.55969807 | 0.357 | 1     | 1 | 19 |
| SLA2         | 0.18300612 | 0.4438461  | 0.357 | 1     | 1 | 19 |
| FCMR5        | 0.18300612 | 0.40295574 | 0.357 | 1     | 1 | 19 |
| TNFSF103     | 0.18300612 | 0.28585029 | 0.357 | 1     | 1 | 19 |
| HSPA57       | 0.18823249 | -0.4598604 | 0.571 | 0.5   | 1 | 19 |
| TSC22D11     | 0.18975492 | 0.98907581 | 0.714 | 1     | 1 | 19 |
| HSP90B17     | 0.19036203 | 0.36166311 | 0.929 | 0.786 | 1 | 19 |
| NRG78        | 0.19885003 | 0.79228245 | 0.357 | 1     | 1 | 19 |
| HIST1H2AG2   | 0.19885003 | 0.58617558 | 0.357 | 1     | 1 | 19 |
| UBE2J14      | 0.20514332 | 0.28424847 | 0.643 | 0.571 | 1 | 19 |
| NUC23        | 0.20576604 | -0.2659069 | 0.714 | 0.857 | 1 | 19 |
| VIM5         | 0.20638757 | -0.8662001 | 0.929 | 0.929 | 1 | 19 |
| HIST1H2BC2   | 0.21800322 | -1.5495315 | 0.429 | 1     | 1 | 19 |
| CIQBP1       | 0.22311739 | 0.26495403 | 0.786 | 0.786 | 1 | 19 |
| SLC43A3      | 0.23050822 | 0.29292917 | 0.286 | 0.5   | 1 | 19 |
| ATF35        | 0.2354807  | -0.2817296 | 0.071 | 0.643 | 1 | 19 |
| LSM5         | 0.23906864 | -0.2868803 | 0.571 | 1     | 1 | 19 |
| MDH11        | 0.24004049 | 0.26859409 | 0.643 | 0.714 | 1 | 19 |
| CALM23       | 0.24107355 | 0.34658085 | 0.786 | 1     | 1 | 19 |
| ANXA64       | 0.24126684 | 0.27051967 | 0.857 | 1     | 1 | 19 |
| IGF2BP2      | 0.25475116 | 0.26255948 | 0.429 | 0.571 | 1 | 19 |
| GUCY1B11     | 0.25475116 | 0.25921778 | 0.429 | 0.571 | 1 | 19 |
| CCT83        | 0.25963184 | -0.3468734 | 0.714 | 1     | 1 | 19 |
| ERG          | 0.27222645 | 0.43905029 | 0.357 | 0.571 | 1 | 19 |
| GSTM3        | 0.27592771 | -0.4304494 | 0.071 | 0.643 | 1 | 19 |
| DUSP12       | 0.28017858 | 0.38283963 | 0.857 | 0.857 | 1 | 19 |
| PECAM13      | 0.29560041 | 0.42448895 | 0.429 | 1     | 1 | 19 |
| P2RX12       | 0.29560041 | 0.38151888 | 0.429 | 0.571 | 1 | 19 |
| HIF02        | 0.30055668 | 0.35651861 | 0.714 | 0.714 | 1 | 19 |
| CD745        | 0.30121901 | 0.30831986 | 1     | 1     | 1 | 19 |
| STMN13       | 0.34616379 | -0.305827  | 0.857 | 1     | 1 | 19 |
| TMSB4X1      | 0.34622979 | -0.3003638 | 1     | 1     | 1 | 19 |
| Clorf1624    | 0.35536407 | -0.368143  | 0.214 | 0.429 | 1 | 19 |
| HSH2D2       | 0.35536407 | -0.4645263 | 0.214 | 0.429 | 1 | 19 |
| YWHAQ4       | 0.37000149 | 0.32338652 | 0.786 | 0.857 | 1 | 19 |
| IFNGR22      | 0.3759475  | -0.3571671 | 0.143 | 0.429 | 1 | 19 |
| TAL11        | 0.39677275 | -0.2839008 | 0.071 | 0.429 | 1 | 19 |
| PNP3         | 0.39677275 | -0.4310929 | 0.071 | 0.429 | 1 | 19 |
| TRBV183      | 0.40536274 | 0.27495623 | 0.071 | 0.143 | 1 | 19 |
| DDIT44       | 0.4105774  | 0.63760709 | 0.286 | 0.571 | 1 | 19 |
| AC011139.1   | 0.4105774  | 0.55620284 | 0.286 | 0.571 | 1 | 19 |
| BTK1         | 0.41593763 | 0.47467829 | 0.429 | 1     | 1 | 19 |
| 13-Sep       | 0.41593763 | 0.37458482 | 0.429 | 1     | 1 | 19 |
| PADI41       | 0.41593763 | 0.27597754 | 0.429 | 1     | 1 | 19 |
| SPI1         | 0.41911173 | -0.311627  | 0.571 | 1     | 1 | 19 |
| RPS27L3      | 0.42007333 | 0.29349751 | 0.643 | 0.786 | 1 | 19 |
| HOPX5        | 0.42071181 | 0.41956662 | 0.714 | 0.786 | 1 | 19 |
| LIMS14       | 0.42071181 | 0.25615728 | 0.714 | 0.714 | 1 | 19 |
| LYZ7         | 0.4243042  | -1.2559179 | 0.071 | 0.429 | 1 | 19 |
| HLA-DQB15    | 0.44712304 | -0.3216203 | 0.643 | 1     | 1 | 19 |
| AL138963.310 | 0.47120549 | 0.75833818 | 0.429 | 0.643 | 1 | 19 |
| IGHM1        | 0.4757433  | 0.50453617 | 0.714 | 1     | 1 | 19 |
| CORO1A3      | 0.4761062  | 0.45543893 | 0.786 | 1     | 1 | 19 |
| FTL3         | 0.47634772 | -0.3158264 | 1     | 1     | 1 | 19 |
| 6-Jun        | 0.47634772 | -0.5006832 | 0.929 | 0.929 | 1 | 19 |
| VSIR         | 0.5032051  | 0.80473273 | 0.571 | 0.929 | 1 | 19 |
| HADH         | 0.5046732  | 0.25601153 | 0.714 | 1     | 1 | 19 |
| FGR3         | 0.5073687  | -0.3324569 | 0     | 0.571 | 1 | 19 |
| AREG5        | 0.5073687  | -0.5325259 | 0     | 0.429 | 1 | 19 |
| CXCL84       | 0.5073687  | -0.7444946 | 0     | 0.429 | 1 | 19 |
| RPS4Y12      | 0.5073687  | -0.8775628 | 0     | 0.429 | 1 | 19 |
| ID13         | 0.52556437 | -0.6534522 | 0.286 | 0.643 | 1 | 19 |
| JCHAIN2      | 0.53029954 | 0.86015713 | 0.429 | 1     | 1 | 19 |
| MEF2C4       | 0.53190396 | 0.35819158 | 0.5   | 1     | 1 | 19 |
| LTB6         | 0.53309663 | 0.86100691 | 0.571 | 1     | 1 | 19 |
| ILK4         | 0.53309663 | 0.65890846 | 0.571 | 1     | 1 | 19 |
| ADA1         | 0.53309663 | 0.42110498 | 0.571 | 1     | 1 | 19 |
| SOD23        | 0.55668671 | -0.4303969 | 0.286 | 0.643 | 1 | 19 |
| GATA21       | 0.56272524 | 0.49491079 | 0.5   | 1     | 1 | 19 |

|            |            |            |       |       |            |    |
|------------|------------|------------|-------|-------|------------|----|
| PLSCR12    | 0.58868104 | -0.427002  | 0.286 | 0.643 | 1          | 19 |
| PCDH9      | 0.59438355 | 0.4570253  | 0.5   | 1     | 1          | 19 |
| FBL3       | 0.59545531 | 0.3690553  | 0.571 | 0.857 | 1          | 19 |
| SPINK2     | 0.5972229  | 0.37180373 | 0.929 | 1     | 1          | 19 |
| RHOB4      | 0.64935486 | -0.2517107 | 0.143 | 0.5   | 1          | 19 |
| LMNA7      | 0.65508795 | -0.6249655 | 0.286 | 0.643 | 1          | 19 |
| LAT22      | 0.66001913 | 0.32198974 | 0.5   | 1     | 1          | 19 |
| HDAC12     | 0.66094514 | 0.57188722 | 0.571 | 1     | 1          | 19 |
| HLA-DPA15  | 0.66247185 | 0.28408342 | 1     | 1     | 1          | 19 |
| PYCARD3    | 0.69573012 | 0.44928915 | 0.714 | 1     | 1          | 19 |
| ITM2C1     | 0.69573012 | 0.29685293 | 0.714 | 1     | 1          | 19 |
| SLC40A12   | 0.72913983 | 0.32790457 | 0.571 | 1     | 1          | 19 |
| CSF3R2     | 0.75987847 | -0.4678714 | 0.286 | 0.5   | 1          | 19 |
| CD381      | 0.75987847 | -0.6231931 | 0.286 | 0.5   | 1          | 19 |
| XBP11      | 0.76253533 | -0.3223272 | 0.429 | 0.714 | 1          | 19 |
| CTSA3      | 0.76410039 | 0.39550234 | 0.571 | 1     | 1          | 19 |
| PRDX14     | 0.7650747  | 0.25279041 | 0.786 | 0.857 | 1          | 19 |
| S100A46    | 0.76519954 | -0.3803604 | 0.929 | 1     | 1          | 19 |
| SELENOP    | 0.798977   | 0.35498243 | 0.5   | 1     | 1          | 19 |
| RAB13      | 0.798977   | -0.3095865 | 0.5   | 0.714 | 1          | 19 |
| PARP11     | 0.79954862 | 0.30566916 | 0.571 | 1     | 1          | 19 |
| CD34       | 0.80049059 | 0.3665032  | 0.929 | 1     | 1          | 19 |
| HLA-DQA15  | 0.827505   | -0.382268  | 0.071 | 0.5   | 1          | 19 |
| EREG3      | 0.86697208 | -0.8383936 | 0.143 | 0.571 | 1          | 19 |
| CLEC11A    | 0.86824485 | -0.2505861 | 0.214 | 0.571 | 1          | 19 |
| MIDN2      | 0.86824485 | -0.3951077 | 0.214 | 0.571 | 1          | 19 |
| TRBC23     | 0.87188957 | 0.27101216 | 0.643 | 1     | 1          | 19 |
| PHGDH      | 0.90784301 | 0.34306438 | 0.5   | 1     | 1          | 19 |
| ETS22      | 0.90784301 | 0.26991851 | 0.5   | 0.786 | 1          | 19 |
| CLIC2      | 0.94277046 | -0.2678534 | 0.143 | 0.571 | 1          | 19 |
| HNRNPAB    | 0.94376992 | -0.3564373 | 0.286 | 0.571 | 1          | 19 |
| ZEB23      | 0.94441044 | -0.2683621 | 0.429 | 0.643 | 1          | 19 |
| SLC2A5     | 0.94462681 | 1.03090784 | 0.5   | 1     | 1          | 19 |
| MCM33      | 0.94462681 | 0.31143704 | 0.5   | 0.929 | 1          | 19 |
| ID25       | 0.98109324 | -0.2757127 | 0.214 | 0.571 | 1          | 19 |
| PRDX3      | 0.98158274 | 0.26329669 | 0.571 | 1     | 1          | 19 |
| HIST1HIC5  | 0.9816611  | -0.9667573 | 0.786 | 0.857 | 1          | 19 |
| MAFF2      | 1          | -0.2790278 | 0     | 0.5   | 1          | 19 |
| ID32       | 1          | -0.5426118 | 0     | 0.5   | 1          | 19 |
| IGKV3-112  | 3.76E-05   | 4.32275404 | 0.059 | 1     | 0.07516712 | 20 |
| AC233755.1 | 3.76E-05   | 1.4155288  | 0.059 | 1     | 0.07516712 | 20 |
| IGHV1-69D  | 3.76E-05   | 0.57537191 | 0.059 | 1     | 0.07516712 | 20 |
| IGKV3-202  | 0.00015926 | 3.61524327 | 0.118 | 1     | 0.3185233  | 20 |
| IGHV4-41   | 0.0002559  | 2.7122572  | 0.118 | 1     | 0.51179062 | 20 |
| IGLV2-143  | 0.00028376 | -2.1078954 | 0.059 | 0.111 | 0.56751873 | 20 |
| IGLV1-442  | 0.00050806 | 5.61699168 | 0.118 | 1     | 1          | 20 |
| IGLV3-192  | 0.00050806 | 4.96058776 | 0.118 | 1     | 1          | 20 |
| IGHV3-213  | 0.00050806 | 3.71308999 | 0.118 | 1     | 1          | 20 |
| IGHV4-591  | 0.00050806 | 3.70890892 | 0.118 | 1     | 1          | 20 |
| IGKV1-161  | 0.00050806 | 0.44391198 | 0.118 | 1     | 1          | 20 |
| IGHV1-181  | 0.00050806 | 0.38989955 | 0.118 | 1     | 1          | 20 |
| IGHV1-69   | 0.00153931 | 3.3536253  | 0.176 | 1     | 1          | 20 |
| IGLV1-402  | 0.0027787  | 5.15455718 | 0.176 | 1     | 1          | 20 |
| IGHV4-61   | 0.00405421 | 3.31391121 | 0.176 | 1     | 1          | 20 |
| IGKV1D-392 | 0.00405421 | 2.33330977 | 0.176 | 1     | 1          | 20 |
| IGKV1-391  | 0.00405421 | 0.80114779 | 0.176 | 1     | 1          | 20 |
| IGKV1-52   | 0.00487376 | 4.39567843 | 0.176 | 0.889 | 1          | 20 |
| RPS4Y13    | 0.00767922 | 0.25053519 | 0     | 0.222 | 1          | 20 |
| IGHV3-111  | 0.00767922 | -0.4447839 | 0     | 0.222 | 1          | 20 |
| IGHV3-48   | 0.00767922 | -2.6449676 | 0     | 0.222 | 1          | 20 |
| IGHV3-742  | 0.00767922 | -3.4308263 | 0     | 0.222 | 1          | 20 |
| IGHV7-4-11 | 0.01929653 | 4.47317059 | 0.118 | 0.667 | 1          | 20 |
| IGHV3-661  | 0.03092198 | -0.523448  | 0.059 | 0.222 | 1          | 20 |
| IGHV3-532  | 0.03092198 | -0.9134148 | 0.059 | 0.222 | 1          | 20 |
| LYZ8       | 0.03130239 | 0.49375736 | 0.059 | 0.778 | 1          | 20 |
| CD79B2     | 0.05194247 | -0.3632115 | 0.765 | 0.889 | 1          | 20 |
| GAS61      | 0.06903515 | -0.3075738 | 0.176 | 0.778 | 1          | 20 |
| IGHV1-22   | 0.07857605 | 4.97800194 | 0.294 | 1     | 1          | 20 |
| ATF5       | 0.08216949 | -0.2615475 | 0.118 | 0.333 | 1          | 20 |
| IGHV3-232  | 0.09328943 | 2.12632692 | 0.118 | 0.778 | 1          | 20 |
| TMN14      | 0.09600576 | -0.3561431 | 0.412 | 0.889 | 1          | 20 |
| IGKV2D-28  | 0.09670429 | -0.6105872 | 0.059 | 0.333 | 1          | 20 |
| SELL5      | 0.10054115 | -0.3774812 | 0.176 | 0.778 | 1          | 20 |
| IGHG2      | 0.10678902 | 1.19767769 | 0.235 | 0.889 | 1          | 20 |
| IGLV3-251  | 0.11255341 | -1.4820997 | 0     | 0.333 | 1          | 20 |
| IGHG31     | 0.1668502  | -0.9566721 | 0.235 | 0.778 | 1          | 20 |
| MT-ND64    | 0.17710282 | -0.3120484 | 0.765 | 1     | 1          | 20 |
| HIST1H2AH  | 0.19638335 | -0.4175439 | 0.059 | 0.667 | 1          | 20 |
| DUSP13     | 0.21354137 | 0.38534507 | 0.706 | 0.889 | 1          | 20 |
| IGLV1-41   | 0.21428113 | -0.7825727 | 0.059 | 0.222 | 1          | 20 |
| MT-CYB3    | 0.21511356 | -0.6314354 | 1     | 1     | 1          | 20 |
| IGHA22     | 0.22892552 | 1.50088481 | 0.529 | 1     | 1          | 20 |
| MT-ND4L4   | 0.23572905 | -0.5124612 | 1     | 1     | 1          | 20 |
| CD694      | 0.23921156 | 0.28030278 | 0.353 | 0.556 | 1          | 20 |
| IGKV3-152  | 0.2424504  | 2.11860535 | 0.059 | 0.667 | 1          | 20 |
| IGKC3      | 0.25078552 | -0.4885759 | 0.529 | 1     | 1          | 20 |
| CD3201     | 0.25311098 | -0.3719846 | 0.588 | 0.889 | 1          | 20 |
| HIST1H4C4  | 0.25762332 | -0.8115655 | 0.882 | 1     | 1          | 20 |
| IGHA12     | 0.25762332 | -0.9500917 | 0.882 | 1     | 1          | 20 |
| CD746      | 0.25770469 | 0.2909208  | 1     | 1     | 1          | 20 |
| ATPIB31    | 0.26713292 | -0.2836176 | 0.412 | 0.778 | 1          | 20 |
| IGHG4      | 0.27378103 | 0.47175503 | 0.235 | 0.778 | 1          | 20 |
| RRBP11     | 0.27941236 | -0.2534342 | 0.706 | 0.889 | 1          | 20 |
| FKBP112    | 0.28106227 | -0.2569144 | 0.941 | 1     | 1          | 20 |
| GPRC5D     | 0.29983054 | -0.2745787 | 0.235 | 0.444 | 1          | 20 |
| VIM6       | 0.30581671 | 0.47183856 | 1     | 1     | 1          | 20 |
| HERPUD15   | 0.33197547 | 0.41712472 | 1     | 1     | 1          | 20 |
| PSME25     | 0.33197547 | -0.2516642 | 1     | 1     | 1          | 20 |

|              |            |            |       |       |   |    |
|--------------|------------|------------|-------|-------|---|----|
| CCND2        | 0.34802838 | -0.3020483 | 0.176 | 0.667 | 1 | 20 |
| MT-CO23      | 0.38849556 | -0.5566072 | 1     | 1     | 1 | 20 |
| IGHV3-301    | 0.40138642 | -0.5824979 | 0.118 | 0.667 | 1 | 20 |
| PDIA62       | 0.41883038 | -0.3493246 | 0.941 | 1     | 1 | 20 |
| KLF103       | 0.44612938 | 0.28050599 | 0.588 | 0.667 | 1 | 20 |
| S100A88      | 0.46036711 | 0.90685482 | 0.059 | 0.444 | 1 | 20 |
| S100A96      | 0.46036711 | 0.6308156  | 0.059 | 0.444 | 1 | 20 |
| IGLC31       | 0.46072792 | -1.1811587 | 0.294 | 0.444 | 1 | 20 |
| CITED21      | 0.48201447 | 0.30764279 | 0.706 | 1     | 1 | 20 |
| GNG71        | 0.48351618 | 0.26674754 | 0.941 | 1     | 1 | 20 |
| MT-ATP64     | 0.48351618 | -0.5239949 | 1     | 1     | 1 | 20 |
| IGKV3D-11    | 0.49858218 | -1.2895034 | 0.059 | 0.444 | 1 | 20 |
| IGHV1-461    | 0.49858218 | -2.3541195 | 0.059 | 0.444 | 1 | 20 |
| CXCR31       | 0.50123461 | -0.3369167 | 0.353 | 0.778 | 1 | 20 |
| MT-CO32      | 0.51778621 | -0.435777  | 1     | 1     | 1 | 20 |
| LINC017811   | 0.54942434 | 0.44414378 | 0.588 | 1     | 1 | 20 |
| HIST1H1C6    | 0.55320375 | -0.2956394 | 0.882 | 1     | 1 | 20 |
| PPIA3        | 0.5532716  | -0.3382903 | 1     | 1     | 1 | 20 |
| POU2AF1      | 0.5899089  | -0.2931377 | 1     | 1     | 1 | 20 |
| AQP34        | 0.5899089  | -0.3633557 | 1     | 1     | 1 | 20 |
| IGLV3-11     | 0.60418031 | -0.8455543 | 0.235 | 0.667 | 1 | 20 |
| AC103591.310 | 0.61160594 | -0.2855993 | 0     | 0.444 | 1 | 20 |
| PCNA1        | 0.61160594 | -0.3335656 | 0     | 0.556 | 1 | 20 |
| AC233755.2   | 0.61160594 | -0.4702311 | 0     | 0.556 | 1 | 20 |
| IGLV6-571    | 0.61397236 | -0.25163   | 0.353 | 0.556 | 1 | 20 |
| S100A47      | 0.66329958 | 0.52614114 | 0.588 | 1     | 1 | 20 |
| IGLC21       | 0.6977265  | 0.57062745 | 0.412 | 0.667 | 1 | 20 |
| MYBL2        | 0.6977265  | -0.3099419 | 0.412 | 0.667 | 1 | 20 |
| FOS7         | 0.70185731 | 0.61256099 | 0.529 | 0.889 | 1 | 20 |
| HIST1H2BC3   | 0.70324637 | 0.29669171 | 0.588 | 1     | 1 | 20 |
| HIFX6        | 0.70324637 | -0.8497163 | 0.588 | 0.778 | 1 | 20 |
| SAT16        | 0.70548689 | 0.31483456 | 0.765 | 1     | 1 | 20 |
| S100A105     | 0.70591935 | 0.26168834 | 0.882 | 1     | 1 | 20 |
| LGALS17      | 0.70596729 | 0.55704805 | 0.941 | 1     | 1 | 20 |
| MT-CO12      | 0.74640684 | -0.5850058 | 1     | 1     | 1 | 20 |
| ITGB14       | 0.77663182 | 0.37563607 | 0.294 | 0.667 | 1 | 20 |
| IGHV2-51     | 0.80561966 | -0.4425771 | 0.059 | 0.556 | 1 | 20 |
| IGLV1-511    | 0.85357368 | 0.56680205 | 0.059 | 0.556 | 1 | 20 |
| HIST1H2BJ1   | 0.86033021 | -0.4285794 | 0.176 | 0.556 | 1 | 20 |
| HIST1H1D4    | 0.86968127 | -0.3921697 | 0.529 | 0.667 | 1 | 20 |
| MT-ATP87     | 0.87154965 | -0.5273716 | 1     | 1     | 1 | 20 |
| IGKV4-12     | 0.9066203  | -3.7777494 | 0.176 | 0.556 | 1 | 20 |
| AC007952.46  | 0.91401287 | -0.3874304 | 0.765 | 0.778 | 1 | 20 |
| H2AFZ5       | 0.91415941 | -0.2738257 | 0.941 | 1     | 1 | 20 |
| FAM30A3      | 0.95475055 | 0.4245711  | 0.294 | 0.667 | 1 | 20 |
| HIST1H1E4    | 0.95701004 | -0.2559612 | 0.882 | 1     | 1 | 20 |
| CANX4        | 0.95701004 | -0.4802072 | 0.882 | 1     | 1 | 20 |
| PRDM13       | 1          | -0.2978441 | 0.824 | 0.889 | 1 | 20 |
| SHCBP1       | 1          | -0.4248977 | 0.176 | 0.556 | 1 | 20 |
